# Supplementary material for: Cost-effectiveness of an 8-week supervised education and exercise therapy programme for knee and hip osteoarthritis: a pre–post analysis of 16 255 patients participating in Good Life with osteoArthritis in Denmark (GLA:D)
Source: PubMed Central journal article supplement — BMJ Open. 2021 Dec 12;11(12):e049541. doi: 10.1136/bmjopen-2021-049541 (PMC8672017; doi:10.1136/bmjopen-2021-049541), 2021-12-12
Supplement: bmjopen-2021-049541.draft_revisions.pdf [file bmjopen-2021-049541.draft_revisions.pdf]

# BMJ Open

BMJ Open is committed to open peer review. As part of this commitment we make the peer review history of every article we publish publicly available.

When an article is published we post the peer reviewers' comments and the authors' responses online. We also post the versions of the paper that were used during peer review. These are the versions that the peer review comments apply to.

The versions of the paper that follow are the versions that were submitted during the peer review process. They are not the versions of record or the final published versions. They should not be cited or distributed as the published version of this manuscript.

BMJ Open is an open access journal and the full, final, typeset and author-corrected version of record of the manuscript is available on our site with no access controls, subscription charges or pay-per-view fees (<http://bmjopen.bmj.com>).

If you have any questions on BMJ Open's open peer review process please email [info.bmjopen@bmj.com](mailto:info.bmjopen@bmj.com)

# BMJ Open

**COST-EFFECTIVENESS OF AN 8-WEEK SUPERVISED  
EDUCATION AND EXERCISE THERAPY PROGRAM FOR KNEE  
AND HIP OSTEOARTHRITIS: A PRE-POST ANALYSIS OF  
16,255 PATIENTS PARTICIPATING IN GOOD LIFE WITH  
OSTEOARTHRITIS IN DENMARK (GLA:D®)**

|                               |                                                                                                                                                                                                                                                                                                                                                                                                                                                                                                                                        |
|-------------------------------|----------------------------------------------------------------------------------------------------------------------------------------------------------------------------------------------------------------------------------------------------------------------------------------------------------------------------------------------------------------------------------------------------------------------------------------------------------------------------------------------------------------------------------------|
| Journal:                      | <i>BMJ Open</i>                                                                                                                                                                                                                                                                                                                                                                                                                                                                                                                        |
| Manuscript ID                 | bmjopen-2021-049541                                                                                                                                                                                                                                                                                                                                                                                                                                                                                                                    |
| Article Type:                 | Original research                                                                                                                                                                                                                                                                                                                                                                                                                                                                                                                      |
| Date Submitted by the Author: | 28-Jan-2021                                                                                                                                                                                                                                                                                                                                                                                                                                                                                                                            |
| Complete List of Authors:     | Grønne, Dorte; University of Southern Denmark, Department of Sports Science and Clinical Biomechanics<br>Roos, Ewa; University of Southern Denmark, Department of Sports Science and Clinical Biomechanics<br>Ibsen, Rikke; I2minds<br>Kjellberg, Jakob; VIVE - The Danish Center for Social Science Research<br>Skou, Søren; University of Southern Denmark, Department of Sports Science and Clinical Biomechanics; Occupational Therapy Næstved-Slagelse-Ringsted Hospitals, Department of Sports Science and Clinical Biomechanics |
| Keywords:                     | HEALTH ECONOMICS, Knee < ORTHOPAEDIC & TRAUMA SURGERY, Hip < ORTHOPAEDIC & TRAUMA SURGERY, SPORTS MEDICINE, Musculoskeletal disorders < ORTHOPAEDIC & TRAUMA SURGERY                                                                                                                                                                                                                                                                                                                                                                   |
|                               |                                                                                                                                                                                                                                                                                                                                                                                                                                                                                                                                        |

SCHOLARONE™  
Manuscripts

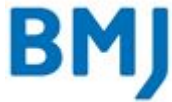

I, the Submitting Author has the right to grant and does grant on behalf of all authors of the Work (as defined in the below author licence), an exclusive licence and/or a non-exclusive licence for contributions from authors who are: i) UK Crown employees; ii) where BMJ has agreed a CC-BY licence shall apply, and/or iii) in accordance with the terms applicable for US Federal Government officers or employees acting as part of their official duties; on a worldwide, perpetual, irrevocable, royalty-free basis to BMJ Publishing Group Ltd ("BMJ") its licensees and where the relevant Journal is co-owned by BMJ to the co-owners of the Journal, to publish the Work in this journal and any other BMJ products and to exploit all rights, as set out in our [licence](#).

The Submitting Author accepts and understands that any supply made under these terms is made by BMJ to the Submitting Author unless you are acting as an employee on behalf of your employer or a postgraduate student of an affiliated institution which is paying any applicable article publishing charge ("APC") for Open Access articles. Where the Submitting Author wishes to make the Work available on an Open Access basis (and intends to pay the relevant APC), the terms of reuse of such Open Access shall be governed by a Creative Commons licence – details of these licences and which [Creative Commons](#) licence will apply to this Work are set out in our licence referred to above.

Other than as permitted in any relevant BMJ Author's Self Archiving Policies, I confirm this Work has not been accepted for publication elsewhere, is not being considered for publication elsewhere and does not duplicate material already published. I confirm all authors consent to publication of this Work and authorise the granting of this licence.

1  
2  
3  
4 1 **COST-EFFECTIVENESS OF AN 8-WEEK SUPERVISED EDUCATION AND**  
5  
6  
7 2 **EXERCISE THERAPY PROGRAM FOR KNEE AND HIP**  
8  
9  
10 3 **OSTEOARTHRITIS: A PRE-POST ANALYSIS OF 16,255 PATIENTS**  
11  
12 4 **PARTICIPATING IN GOOD LIFE WITH OSTEOARTHRITIS IN**  
13  
14  
15 5 **DENMARK (GLA:D®)**

16  
17  
18 6 Dorte T. Grønne<sup>1</sup> PT, MSc, Ewa M. Roos<sup>1</sup> PT, PhD, Rikke Ibsen<sup>2</sup> MSc, Jakob Kjellberg<sup>3</sup> PhD, Søren T.  
19  
20 7 Skou<sup>1,4</sup> PT, PhD

21  
22  
23 8 <sup>1</sup> Research Unit for Musculoskeletal Function and Physiotherapy, Department of Sports Science and Clinical  
24  
25 9 Biomechanics, University of Southern Denmark, Denmark

26  
27  
28 10 <sup>2</sup> I2minds, Aarhus, Denmark

29  
30  
31 11 <sup>3</sup> VIVE - The Danish Center for Social Science Research, Copenhagen, Hovedstaden, Denmark

32  
33  
34 12 <sup>4</sup> Department of Physiotherapy and Occupational Therapy, Næstved-Slagelse-Ringsted Hospitals, Denmark

35  
36 13 **Emails:**

37  
38  
39 14 DTG: [dgronne@health.sdu.dk](mailto:dgronne@health.sdu.dk); EMR: [eroos@health.sdu.dk](mailto:eroos@health.sdu.dk) ; RI: [rikke@i2minds.dk](mailto:rikke@i2minds.dk); JK:  
40  
41 [jakj@vive.dk](mailto:jakj@vive.dk); STS: [stskou@health.sdu.dk](mailto:stskou@health.sdu.dk)

42  
43  
44 15  
45 16 **Corresponding author:**

46  
47  
48 17 Dorte Thalund Grønne; IOB, SDU, Campusvej 55; DK-5230 Odense M; email:  
49  
50 18 [dgronne@health.sdu.dk](mailto:dgronne@health.sdu.dk); Telephone: +45 40 77 99 39

51  
52  
53 19 **Original research article for BMJ Open**

54  
55  
56 20 Word count abstract: 298 words

57  
58  
59 21 Word count manuscript: 4.256

## 22 ABSTRACT

23 **Objectives:** To evaluate one-year cost-effectiveness of an 8-week supervised education and  
24 exercise therapy program delivered in primary care to patients with symptomatic knee or hip  
25 osteoarthritis (OA).

26 **Design:** A register-based pre-post study linking patient level data from the Good Life with  
27 osteoArthritis in Denmark (GLA:D<sup>®</sup>) registry to national registries in Denmark.

28 **Setting and participants:** 16,255 patients with symptomatic knee or hip OA attending GLA:D<sup>®</sup>.

29 **Intervention:** GLA:D<sup>®</sup> is a structured supervised patient education and exercise therapy program  
30 delivered by certified physiotherapists and implemented nationwide in Denmark.

31 **Outcome measures:** Raw and adjusted health care costs per Quality-Adjusted Life Year (QALY)  
32 gained in a one-year horizon calculated as the ratio of change in health care costs to change in  
33 EuroQoL 5-Dimensions 5-Level questionnaire (EQ-5D). Adjusted measures were estimated using a  
34 generalized estimating equation gamma regression model for repeated measures. Missing data on  
35 EQ-5D were imputed with Multiple Imputations (3 months: 23%; 1 year: 39 %). A sub-analysis  
36 repeating all analyses in patients with high compliance was conducted.

37 **Results:** Adjusted change in health care cost was 298€ (95% CI: 206-419)/640€ (400-1,009) and  
38 change in EQ-5D was 0.035 (0.033-0.037)/0.028 (0.025-0.032) for knee and hip patients  
39 respectively. Hence estimated adjusted health care costs per QALY gained was 8,497€ (6,242-  
40 11,324) for knee and 22,568€ (16,000-31,531) for hip patients. Restricting the regression analysis to  
41 patients with high compliance, the adjusted health care costs per QALY gained decreased to 5,438€  
42 (2,758-9,231) for knee and 17,330€ (10,041-29,364) for hip patients primarily due to lower change

1  
2  
3  
4 43 in costs. Health care costs per QALY were below conventional thresholds for willingness-to-pay at  
5  
6 44 22,804€ (20,000£) and 43,979€ (50,000 USD).  
7  
8

9  
10 45 **Conclusions:** A structured 8-week supervised education and exercise therapy program delivered in  
11  
12 46 primary care was cost-effective at one year in patients with knee or hip OA supporting large scale  
13  
14 47 implementation in clinical practice.  
15  
16

17 48  
18  
19  
20 49 **Keywords:** knee, hip, osteoarthritis, exercise therapy, patient education, cost-effectiveness  
21  
22  
23 50  
24  
25

## 26 27 51 **STRENGTHS AND LIMITATIONS OF THIS STUDY**

- 28  
29  
30 52 • The study included a large number of rural and urban patients with knee or hip OA treated  
31  
32 in primary care across Denmark.
- 33 53  
34  
35 54 • All costs reported are real-life costs retrieved on an individual level from a range of high-  
36  
37 quality national registries.
- 38 55  
39  
40 56 • The study is a pre-post study reporting change in health care costs against change in generic  
41  
42 health related quality of life (EQ-5D).
- 43 57  
44 58 • Health care costs per Quality-Adjusted Life Year (QALY) was reported in a one-year  
45  
46 horizon and additional change in health care costs were reported in a three-year horizon.
- 47 59  
48  
49 60 • 23% and 39 % of the patients did not provide data on EQ-5D immediately following the  
50  
51 intervention and at one year respectively, and the missing data was imputed with Multiple  
52 61  
53 Imputations.  
54 62  
55  
56  
57  
58  
59  
60

1  
2  
3  
4  
5  
6  
7  
8  
9  
10  
11  
12  
13  
14  
15  
16  
17  
18  
19  
20  
21  
22  
23  
24  
25  
26  
27  
28  
29  
30  
31  
32  
33  
34  
35  
36  
37  
38  
39  
40  
41  
42  
43  
44  
45  
46  
47  
48  
49  
50  
51  
52  
53  
54  
55  
56  
57  
58  
59  
60

## 63 INTRODUCTION

64

65 Knee and hip osteoarthritis (OA) are major contributors to disability and chronic pain worldwide  
66 and the implications for both the patients and health care systems are severe,[1,2]. The cost related  
67 to OA is estimated to be between 1% and 2.5% of a country's gross domestic product (GDP) in  
68 high-income countries,[1], and total annual costs in Europe are estimated to be up to 817 billion €  
69 (2013),[3]. The number of people living with OA has increased over the last years and is expected  
70 to increase substantially in the future due to an ageing and more overweight and obese  
71 population,[4]. This will have extensive societal impact, emphasizing the need for identifying and  
72 implementing cost-effective treatment options that can help relieve the pressure health care services  
73 around the world are facing,[4].

74

75 Clinical guidelines recommend a stepwise treatment approach, including education and exercise  
76 therapy as first-line treatment for knee and hip OA,[5-8] with substantial evidence supporting the  
77 effects of supervised exercise therapy on pain and physical function,[9-10]. However, studies of  
78 quality of care report that exercise therapy is underutilized, estimated to be provided to less than  
79 40% of patients with OA,[11,12]. To support the implementation of clinical guidelines into clinical  
80 practice, Good Life with osteoArthritis in Denmark (GLA:D®) was initiated in 2013 and has been  
81 implemented across Denmark. The treatment part of GLA:D® is an 8-week supervised patient  
82 education and exercise therapy program delivered in primary care for patients with knee or hip OA  
83 and has shown positive results on pain, physical function, quality of life (QOL), intake of  
84 painkillers and sick leave,[13].

85

1  
2  
3  
4 86 Results from previous evaluations of the cost-effectiveness of first-line treatment including exercise  
5  
6 87 therapy and targeting knee or hip OA are heterogeneous, and little is known about the cost-  
7  
8  
9 88 effectiveness of supervised education and exercise therapy implemented in primary care,[14,15].  
10  
11 89 Such evaluation is warranted when deciding whether to implement a structured first-line treatment  
12  
13 90 program, and therefore the aim of the study was to evaluate the cost-effectiveness of GLA:D<sup>®</sup>. We  
14  
15  
16 91 hypothesized that GLA:D<sup>®</sup> would be cost-effective for both knee and hip OA patients.  
17  
18  
19 92

## 21 93 **METHOD**

### 25 94 26 27 28 95 **Study Design**

29  
30  
31 96  
32  
33  
34 97 This is a register-based pre-post study evaluating the cost-effectiveness of an 8-week supervised  
35  
36 98 education and exercise therapy program (GLA:D<sup>®</sup>) for patients with symptomatic knee or hip OA  
37  
38  
39 99 by linking patient level data from the GLA:D<sup>®</sup> registry to national registries in Denmark. We  
40  
41 100 reported mean actual health care costs and costs to home care and public transfer payments in a  
42  
43 101 three-year horizon and reported health care costs per QALY gained in a one-year horizon calculated  
44  
45  
46 102 as the ratio of change in health care costs to change in QOL. The study conforms to the CHEERS  
47  
48 103 statement for reporting health economic evaluations and recommendations for reporting cost-  
49  
50 104 effectiveness analyses,[16,17].  
51  
52

### 53 105 54 55 56 106 **Intervention** 57 58 59 60



1  
2  
3  
4 107  
5  
6  
7 108 GLA:D<sup>®</sup> is a structured treatment program consisting of two patient education sessions, a session  
8  
9 109 with an expert patient, when available, and of 12 one-hour sessions (delivered twice weekly) of  
10  
11 supervised group-based neuromuscular exercise therapy,[18,19]. Treating therapists are  
12 110  
13 physiotherapists certified to deliver the intervention on a 2-day course and patients are usually  
14 111  
15 referred to the program by their general practitioner or an orthopaedic surgeon, but they may also  
16 112  
17 refer themselves directly. From 2014 to 2016, the GLA:D<sup>®</sup> program was delivered in 283 private  
18 113  
19 clinics across the country and in 28 municipal rehabilitation centers of 98 municipals in Denmark.  
20 114  
21 Most of the patients attending the program in private physiotherapy clinics would receive public  
22 115  
23 reimbursement of approximately 40% of the fee and most patients attending municipal  
24 116  
25 rehabilitation centers would not be charged. A detailed description of the GLA:D<sup>®</sup> program has  
26 117  
27 previously been published,[13].  
28 118  
29  
30 119 The GLA:D<sup>®</sup> registry has previously been approved by the Danish Data Protection Agency (no.  
31 120  
32 10.084) and according to the local ethics committee of the North Denmark Region, ethics approval  
33 121  
34 of GLA:D<sup>®</sup> was not needed. According to the Danish Data Protection Act, patient consent was not  
35 122  
36 required as personal data was processed exclusively for research and statistical purposes.  
37  
38  
39  
40  
41  
42  
43 123  
44  
45

## 46 124 **Population**

47  
48  
49 125  
50  
51  
52 126 Patients are eligible for the GLA:D<sup>®</sup> program if they have a clinical diagnosis of knee and/or hip  
53  
54 127 OA as evaluated by the treating physiotherapist i.e. pain or functional limitations associated with  
55  
56 knee or hip OA and do not meet any of the following exclusion criteria: 1) another reason for the  
57 128  
58 joint symptoms than OA (e.g. tumor, inflammatory joint disease or patellar tendinopathy), 2) other  
59 129  
60

1  
2  
3  
4 130 symptoms that are more pronounced than the OA symptoms (e.g. chronic generalized pain or  
5  
6 131 fibromyalgia), or 3) do not understand Danish. According to international,[20] and Danish,[21]  
7  
8  
9 132 guidelines radiographs are not needed for a clinical diagnosis of OA, and therefore not part of the  
10  
11 133 GLA:D® eligibility criteria. The current study included patients enrolled between February 4, 2014,  
12  
13 134 when collection of the EuroQoL 5-Dimensions 5-Level questionnaire (EQ-5D) was initiated, and  
14  
15  
16 135 December 31, 2016, allowing for one year follow up since information on all costs was available  
17  
18 136 until the end of 2017. Patients with available baseline information on EQ-5D and information on  
19  
20 137 whether a knee or a hip joint was the most affected joint were included in the study. Reporting  
21  
22  
23 138 mean costs in a three-year horizon was restricted to patients entering the program before December  
24  
25 139 31, 2014, allowing for three-year follow up, and reporting costs for public transfer payments were  
26  
27 140 restricted to patients aged 18 to 63 years both in the pre- and post-intervention period to ensure that  
28  
29  
30 141 they did not turn 65 during the post-period which was the retirement age in Denmark in 2017. To  
31  
32 142 cover living expenses public transfer payments are in Denmark provided to adults under the age of  
33  
34 143 retirement who e.g. are unemployed, have low/no ability to work or are enrolled in education.  
35  
36  
37 144

## 40 145 **Variables**

41  
42  
43 146  
44  
45 147 Data in the GLA:D® registry are collected at baseline, following the intervention (~3 months), and  
46  
47  
48 148 at 12 months and includes demographics, a mix of therapist and patient-reported health measures  
49  
50 149 and outcome measures as well as compliance,[13]. Via the Civil Registration number (CPR), which  
51  
52 150 identifies every citizen in Denmark, the GLA:D® registry was linked to national registries from  
53  
54  
55 151 where actual individual level utilization of somatic health care services (including use of primary  
56  
57 152 health care services, secondary health care services, and use of preceptive medication; i.e. excluding  
58  
59  
60

1  
2  
3  
4 153 use of psychiatric health care services), home care, and public transfer payments were  
5  
6  
7 154 retrieved,[22]. In Denmark home care including practical help and personal care is offered to  
8  
9 155 citizens with low functional level who are unable to manage everyday life on their own. All prices  
10  
11 156 and costs were converted into Euros (€) and reported in present values (2017-level) based on the  
12  
13 157 Danish Consumer Price Index. Costs were given as mean costs per month (one-year horizon) or  
14  
15  
16 158 year (three-year horizon) and public transfer payments were given as full-time weeks (37 h per  
17  
18 159 week) per month (one-year horizon) or per year (three-year horizon).  
19  
20 160 Costs related to primary health care services, including visits to physiotherapist, chiropractor,  
21  
22  
23 161 general practitioner, and others (e.g. medical specialist, laboratory work, dentist), were obtained  
24  
25 162 from the Danish National Health Insurance Service Registry. Within the primary health care sector  
26  
27 163 in Denmark physiotherapy is delivered both in private clinics and in municipality settings however,  
28  
29  
30 164 costs for interventions delivered in municipal settings were not available and therefore not included  
31  
32 165 in the analysis. Services and admissions related to secondary health care, including total somatic  
33  
34 166 inpatient and outpatient services, were obtained from the Danish National Patient Registry and  
35  
36 167 associated costs were estimated based on the Danish Case Mix System. The Danish National Patient  
37  
38  
39 168 Registry holds information on all inpatient admissions and outpatient activities, including accident  
40  
41 169 and emergency visits in Danish hospitals. Every contact is coded in a classification system  
42  
43 170 incorporating ICD-10 codes and use of resources in contacts where surgery in the knee or hip  
44  
45  
46 171 occurred were reported separately. Costs for prescriptive medications were obtained from the  
47  
48 172 Danish National Prescription Registry holding information on all prescriptions on medications,  
49  
50 173 including date of purchase, number of packages and the reimbursement paid by public funds. All  
51  
52  
53 174 drugs are classified according to the Anatomical Therapeutic Chemical Classification System  
54  
55 175 (ATC) and painkillers (ATC-codes: N02A, N02B, M01A, M02AA) and other medications were  
56  
57 176 reported separately. Information on number and duration of visits for personal care and practical  
58  
59  
60

1  
2  
3  
4 177 help, respectively, was retrieved from Statistics Denmark and the average care costs per hour (2017)  
5  
6 178 in Denmark was used to calculate costs. Information on nursing care was not available and therefore  
7  
8  
9 179 not included in the analysis. Information on public transfer payments was retrieved from the  
10  
11 180 Registry for Public Transfers, which holds information on type and hours of public transfer  
12  
13 181 payments and was reported as the number of weeks receiving transfer payment (unemployment,  
14  
15  
16 182 sheltered employment, sick leave, rehabilitation, education, disability pension, early retirement).  
17

18 183  
19  
20 184 Outcome was reported as QALYs gained measured with EQ-5D converted into an index score using  
21  
22  
23 185 time-trade-off based weights from the Danish crosswalk value set (-0.624 to 1; worst to best),[23].  
24  
25 186 The EQ-5D comprises of five dimensions: Mobility, self-care, usual activities, pain discomfort and  
26  
27 187 anxiety/depression each having five levels of response options from ‘no problems’ to ‘severe  
28  
29  
30 188 problems’,[24]. QALYs combine time lived and QOL into a single index number where ‘1’  
31  
32 189 corresponds to one year of full health and ‘0’ corresponds to being dead.  
33

34 190  
35  
36 191 Information on the covariates age (continuous), sex (male or female), marital status  
37  
38  
39 192 (married/coliving or single), ethnic background (western or not western), educational level  
40  
41 193 (primary, secondary, vocational, short-term, bachelor, long-term or unknown) and administrative  
42  
43 194 region (Capital, Zealand, Southern Denmark, Central Denmark or North Denmark) were retrieved  
44  
45  
46 195 from the Danish Civil Registration System. Most affected joint (knee or hip) and information on  
47  
48 196 compliance were therapist-reported and high compliance was defined as patients attending at least  
49  
50 197 10 supervised exercise sessions. Type of clinic (private or municipal) was retrieved from the  
51  
52  
53 198 GLA:D<sup>®</sup> registry and whether the patient died during follow up was retrieved from the Danish Civil  
54  
55 199 Registration System.  
56

57 200  
58  
59  
60

1  
2  
3  
4 201 **Statistical analyses**

5  
6  
7 202

8  
9  
10 203 Descriptive statistics for baseline characteristics, average and predicted costs from somatic health  
11  
12 204 care services and home care and average and predicted weeks receiving public transfer payments  
13  
14  
15 205 one year prior to and one or three years after entering the program, respectively, were reported. To  
16  
17 206 take the potential influence of covariates into account, costs and weeks receiving public transfer  
18  
19 207 payments were predicted using a generalized estimating equation (GEE) gamma regression model  
20  
21  
22 208 for repeated measures. Statistically significant difference between costs in the pre- and post-  
23  
24 209 intervention period was assessed using bootstrap t-test.

25  
26  
27  
28 210

29  
30  
31 211 We estimated health care costs per QALY gained as the ratio of change in total health care costs to  
32  
33 212 change in QOL. Change in health care costs was calculated as the mean cost difference between the  
34  
35 213 year prior to and the year after entering the intervention. QALYs gained was calculated as the mean  
36  
37 214 difference between the EQ-5D score at baseline, before initiating the program, representing the  
38  
39  
40 215 QOL the year prior to the intervention and the EQ-5D score at 3 and 12 months calculated as ‘the  
41  
42 216 area under the curve’ taking change over time into account, representing the QOL the year after  
43  
44 217 entering the program. Data were not normal distributed and changes in costs and EQ-5D were  
45  
46 218 estimated using a GEE gamma regression model for repeated measures. Raw and adjusted analyses  
47  
48 219 including gender, age, marital status, ethnicity, educational level and region as covariates were  
49  
50 220 conducted. In case of no convergence in the model, selected covariates were omitted.

51  
52 221

53  
54  
55  
56  
57  
58  
59  
60

1  
2  
3  
4 222 There is no official threshold for willingness-to-pay in Denmark and we compared the health care  
5  
6 223 cost per QALY to predefined willingness-to-pay thresholds of a cost-effective treatment defined by  
7  
8  
9 224 the National Institute for Health and Care Excellence (NICE) at 22,804€ (20,000£) per QALY,[25]  
10  
11 225 and the widely used threshold of 43,979€ (50,000 USD) per QALY,[26]. To explore if adherence to  
12  
13 226 the exercise therapy component had an impact on the results, a sub-analysis repeating all analyses  
14  
15  
16 227 restricted to patients with high compliance was conducted. All analyses were reported separately for  
17  
18 228 knee and hip patients.  
19  
20  
21  
22 229

23  
24  
25 230 As previously proposed for cost-effectiveness studies and clinical trials in OA,[27,28] missing  
26  
27 231 values for the EQ-5D index score at follow up were imputed using Multiple Imputations (MI) with  
28  
29 232 chained equations under the assumption of data being missing at random,[29]. Since EQ-5D was  
30  
31 233 not normal distributed, Predictive Mean Matching was applied, and all baseline variables presented  
32  
33  
34 234 in the study and outcome variables of interest were included in the model. In total, 40 datasets were  
35  
36 235 generated, approximately equal to the largest percentages of missing observations for the outcome  
37  
38 236 as recommended,[30].  
39  
40  
41 237

42  
43 238 Since costs for health care services delivered in municipal settings were not available, all analyses  
44  
45 239 were repeated stratified for patients attending GLA:D® in private physiotherapy clinics vs. in  
46  
47  
48 240 municipal rehabilitation centers. To explore the impact of missing data, a sensitivity analysis  
49  
50 241 repeating all analyses restricted to complete cases was conducted and all analyses were repeated  
51  
52 242 excluding patients who died during follow up.  
53  
54  
55 243

1  
2  
3  
4  
5  
6  
7  
8  
9  
10  
11  
12  
13  
14  
15  
16  
17  
18  
19  
20  
21  
22  
23  
24  
25  
26  
27  
28  
29  
30  
31  
32  
33  
34  
35  
36  
37  
38  
39  
40  
41  
42  
43  
44  
45  
46  
47  
48  
49  
50  
51  
52  
53  
54  
55  
56  
57  
58  
59  
60

244 The significance level for all statistical analyses was defined a priori at  $p < 0.05$ . All analyses were  
245 performed using the SAS 9.4 (SAS Institute, North Carolina, USA).

## 247 RESULTS

249 12,162 knee patients and 4,093 hip patients were included in the study and follow up data on EQ-  
250 5D were available for 77% immediately after treatment and 61% at one year (Figure 1). Patients  
251 with complete information had slightly better, but most likely not clinically relevant better health  
252 status at baseline compared to patients with incomplete information (Table S1, Supplementary  
253 Appendix). Baseline characteristics are presented in Table 1. Three quarters of the patients were  
254 female, median symptom duration was 2 years, almost two thirds reported use of pain medication  
255 and 31% and 4% of knee and hip patients, respectively, reported previous surgery in most affected  
256 joint.

258 [Figure 1]

259 [Table 1]

261 Predicted health care costs and costs for home care one year prior to and three years after entering  
262 the intervention are presented in Figure 2 and predicted public transfer payments are presented in  
263 Table 2. Additionally, mean and predicted costs one year prior to and one/three years after entering  
264 the intervention respectively are presented in Table S2 and S3, Supplementary Appendix. To take

1  
2  
3  
4 265 the potential influence of covariates into account, costs are predicted for average patients, i.e.  
5  
6 266 women, 65 years old, married/co-living, ethnic Danish, low educational level and living in the  
7  
8  
9 267 Capital Region. Public transfer payments are predicted for women, 55 years old, married/co-living,  
10  
11 268 ethnic Danish, low educational level and living in the Capital Region since the population was  
12  
13 269 restricted to adults under the age of retirement in this analysis, as public transfer payments target  
14  
15  
16 270 this age group. In the one-year horizon, monthly predicted health care costs for knee and hip  
17  
18 271 patients were 263€/235€ one year prior to the intervention, rising to 331€/397€ the year after  
19  
20 272 entering the program (Table S3, Supplementary Appendix). In the three year horizon, yearly  
21  
22  
23 273 predicted health care costs one year prior to the intervention were 3,392€/3,051€ for knee and hip  
24  
25 274 patients, rising to 4,128€/4,473€ the third year after entering the intervention, observing the highest  
26  
27 275 costs the second year post-intervention for knee patients and the first year post-intervention for hip  
28  
29  
30 276 patients (Figure 2a and 2b). The increase in mean health care costs was mainly due to costs related  
31  
32 277 to surgeries in the knee or hip. On average, the raw EQ-5D score increased from 0.711 to 0.756  
33  
34 278 points for knee patients and from 0.705 to 0.747 for hip patients from baseline to one year follow up  
35  
36  
37 279 (Table 3).

38  
39  
40 280  
41  
42 281 [Figure 2]

43  
44  
45 282 [Table 2]

46  
47  
48 283 [Table 3]

49  
50  
51 284  
52  
53  
54 285 Adjusted change in health care cost from the year prior to entering GLA:D<sup>®</sup> to the year after  
55  
56 286 entering GLA:D<sup>®</sup> was 298€ (95% CI: 206-419)/640€ (400-1,009) and QALYs gained were 0.035  
57  
58  
59 287 (0.033-0.037)/0.028 (0.025-0.032) for knee and hip patients, respectively. Hence, one-year  
60



1  
2  
3  
4 288 estimated adjusted health care costs was 8,497€ (6,242-11,324) for knee patients and 22,568€  
5  
6 289 (16,000-31,531) for hip patients per QALY gained (Table 4). Restricting the regression analysis to  
7  
8  
9 290 patients with high compliance, the one-year adjusted health care costs per QALY gained was lower;  
10  
11 291 5,438€ (2,758-9,231) for knee patients and 17,330€ (10,041-29,364) for hip patients primarily due  
12  
13 292 to lower change in health care costs (Table 4). Although the upper limit of the 95% CI for hip  
14  
15  
16 293 patients was in between the two predefined willingness-to-pay thresholds, the estimated health care  
17  
18 294 costs per QALY for both knee and hip patients were below both of the two predefined willingness-  
19  
20 295 to-pay thresholds.

22  
23 296  
24  
25  
26 297 [Table 4]

28  
29 298  
30  
31  
32 299 Sensitivity analyses showed that knee and hip patients attending GLA:D<sup>®</sup> in a private clinic had  
33  
34 300 similar health care costs per QALY but that patients attending GLA:D<sup>®</sup> in a municipal setting had  
35  
36  
37 301 higher costs for knee patients and lower costs for hip patients compared to all patients. This  
38  
39 302 difference was primarily explained by different change in health care costs (Table S5,  
40  
41 303 Supplementary Appendix). The complete case analysis showed lower change in health care costs  
42  
43 304 and lower health care costs per QALY for knee patients (4,829€ (2,313-8,378)) but for hip patients  
44  
45  
46 305 the ratio was similar to that of all patients (Table S5, Supplementary Appendix). 53 patients died  
47  
48 306 within the one-year follow up period and 11 of these within the first 3 months. Repeating all  
49  
50  
51 307 analyses excluding deaths in the regression analyses showed results similar to the main analysis  
52  
53 308 (data not shown).

54  
55  
56 309  
57  
58  
59  
60

## DISCUSSION

Our study demonstrated that an 8-week supervised patient education and exercise therapy program for knee or hip OA implemented in primary care is cost-effective in a one-year horizon with health care costs of 8,497€ per QALY for knee patients and 22,568€ for hip patients. Despite the physiotherapy visits needed to participate in the GLA:D<sup>®</sup> program, increased health care costs were primarily related to knee or hip surgeries and although the mean absolute change in health related QOL is relatively low (~0.03) the intervention is still considered cost-effective. These results support large scale implementation of GLA:D<sup>®</sup> in clinical practice.

To our knowledge this is the first study evaluating the cost-effectiveness of a combined supervised OA education and exercise therapy program with widespread implementation in primary care. Previous analyses of the GLA:D<sup>®</sup> program, but with twice the number of supervised neuromuscular exercise sessions, weight loss, insoles and pain medication if needed, have found similar results,[15,31]. A model-based study suggested that exercise therapy and education was cost-effective as compared to usual care for patients with knee or hip OA in Canada[31], while an analysis of results from a randomized trial comparing supervised exercise therapy, education and other recommended non-surgical interventions to written advice in patients with moderate to severe knee OA found the intervention to be cost-effective with incremental cost effectiveness ratios of 6,229 to 20,688 €/QALY,[15]. Our findings are also in line with other previous studies which have indicated that supervised exercise therapy alone as treatment for OA is cost-effective. Three randomized trials demonstrated that supervised exercise therapy in addition to usual care,

1  
2  
3  
4 332 supplementary class-based exercise in addition to a home-based program and supervised exercise  
5  
6 333 therapy compared to general practitioner care alone was likely to be cost-effective in people with  
7  
8  
9 334 knee and/or hip OA,[32-34]. Also, a model-based study estimated that adding the combination of  
10  
11 335 diet and exercise therapy to usual care for overweight and obese patients with knee OA was cost-  
12  
13 336 effective,[35]. Our study adds to this body of evidence, that large-scale implementation in clinical  
14  
15  
16 337 practice of a structured combined supervised education and exercise therapy program seems cost-  
17  
18 338 effective in a one-year horizon.

19  
20  
21  
22 339  
23  
24  
25 340 In this study, the increased health care costs both one and three years after entering the GLA:D®  
26  
27 341 program were primarily related to surgeries in the knee or hip. According to a stepwise treatment  
28  
29 342 approach, joint replacement surgery is considered to be relevant in patients with end-stage OA once  
30  
31  
32 343 all appropriate non-surgical treatment options such as patient education and supervised exercise  
33  
34 344 therapy of sufficient dose and length, weight loss, walking aids and pain medication have failed to  
35  
36 345 reduce symptoms sufficiently,[36,37]. Existing evidence indicates that providing supervised  
37  
38  
39 346 exercise therapy can have positive impact on the number of patients having joint replacement  
40  
41 347 surgery,[38-40], time to surgery,[39,40] and outcomes from surgery[41]. Ackerman et al conducted  
42  
43 348 a budget impact analysis of implementing a first-line management program such as GLA:D® in  
44  
45 349 Australia and demonstrated that if total knee replacement was avoided in only 1 in 12 GLA:D®  
46  
47  
48 350 participants, the program would generate cost savings,[42]. Although the lack of control group in  
49  
50 351 the current study precludes analyses of avoidance of joint replacements, it highlights that regardless  
51  
52 352 of surgery during follow up, supervised education and exercise therapy is cost-effective.

53  
54  
55  
56 353  
57  
58  
59  
60

1  
2  
3  
4 354 As a result of similar change in EQ-5D, but lower change in health care costs, health care costs per  
5  
6 355 QALY were lower in patients compliant to the intervention compared to all patients enrolled in the  
7  
8  
9 356 program, indicating that the dosage of exercise therapy is important. Although we did not find that  
10  
11 357 higher compliance was associated with greater effects on the EQ-5D, the lower change in health  
12  
13 358 care costs in the compliant patients underlines the importance of exercise dosage as suggested by a  
14  
15  
16 359 systematic review and meta-regression analysis of 48 randomized controlled trials in patients with  
17  
18 360 knee OA showing that 12 or more supervised exercise sessions are more effective than fewer  
19  
20 361 supervised sessions,[43], and a systematic review and meta-analysis in patients with hip OA  
21  
22 362 showing that supervised exercise therapy with high compliance with dose recommendations  
23  
24 363 compared to uncertain compliance was more effective,[44]. Although dosage seems important for  
25  
26 364 the effect and cost-effectiveness, knowledge of optimal exercise dosage in OA is still  
27  
28 365 lacking,[9,43,45].  
29  
30  
31  
32  
33 366

34  
35 367 As there is no official threshold defining a cost-effective treatment in Denmark, we compared the  
36  
37 368 health care costs per QALY to two different internationally widely used willingness-to-pay  
38  
39 369 thresholds. Although the estimated health care costs per QALY for both knee and hip patients were  
40  
41 370 below both of the two thresholds, the upper limit of the 95% CI for hip patients was in between the  
42  
43 371 two thresholds, thus we cannot rule out that the true health care costs per QALY for hip patients is  
44  
45 372 above the lower willingness-to-pay threshold (22,804€). A threshold value for willingness-to-pay  
46  
47 373 for improvements in health is arbitrary and depending on the context such as budget and other  
48  
49 374 treatment options,[26]. Country-level threshold value based on GDP per capita has been discussed  
50  
51 375 but remains unsettled,[46]. When deciding which treatment options to implement and offer, the  
52  
53 376 results from this study can support clinicians and decision-makers in terms of one-year cost-  
54  
55  
56  
57  
58  
59  
60

1  
2  
3  
4  
5  
6  
7  
8  
9  
10  
11  
12  
13  
14  
15  
16  
17  
18  
19  
20  
21  
22  
23  
24  
25  
26  
27  
28  
29  
30  
31  
32  
33  
34  
35  
36  
37  
38  
39  
40  
41  
42  
43  
44  
45  
46  
47  
48  
49  
50  
51  
52  
53  
54  
55  
56  
57  
58  
59  
60

377 effectiveness of supervised education and exercise therapy implemented nationwide for patients  
378 with knee and hip OA in clinical practice.

379

### 380 **Strengths and limitations**

381

382 The major strength of the study is that all costs reported are real-life costs retrieved on an individual  
383 level from a range of high-quality national registries supporting the reliability and validity of the  
384 costs,[22,47,48]. Even though it is likely that a higher level of heterogeneity in treatment protocols  
385 occurred compared to in rigorous clinical trials, another major strength is that the study included a  
386 large number of rural and urban patients with wide inclusion criteria; joint pain and functional  
387 limitations associated with OA, retrieved from a nationwide registry supporting the generalizability  
388 of the findings.

389

390 The main limitation of the study is that the study is a pre-post study where change in health care  
391 costs was evaluated against change in EQ-5D. Without a proper control group, it cannot be ruled  
392 out that the observed change in EQ-5D is related to other factors than the treatment such as  
393 regression to the mean. Also, change in costs can potentially have been affected by increasing age,  
394 since health care costs are expected to increase with increased age and accompanied morbidity,[49].

395

396 In the current study, health care costs per QALY was evaluated in a one-year horizon and  
397 additionally change in costs were reported in a three-year horizon. OA is a long-term chronic  
398 condition,[36], thus evaluating cost-effectiveness in a one-year horizon is a relatively short time

1  
2  
3  
4 399 horizon warranting further long-term cost-effective analyses. However, a recent model-based cost-  
5  
6 400 effectiveness analysis suggested that a physical activity program for patients with knee OA would  
7  
8  
9 401 lead to favorable long-term clinical and economic benefits,[50].  
10  
11

12 402  
13  
14  
15 403 There was a loss to follow up in the GLA:D® registry and conducting a sensitivity analysis  
16  
17 404 restricted to patients with complete information revealed that they had less mean change in health  
18  
19 405 care costs than all included patients, indicating a risk of selective loss to follow up in the GLA:D®  
20  
21  
22 406 registry, however, the evaluation on health care costs per QALY included all patients enrolled in  
23  
24 407 GLA:D®, imputing the missing outcome values at follow up. Imputing missing outcome values  
25  
26 408 relied on the assumption that data were missing at random, i.e. the missingness was related to  
27  
28  
29 409 variables included in the model. However, there is a risk that loss to follow up was related to  
30  
31 410 unobserved factors not available for the analysis. One third did not provide information on  
32  
33 411 compliance and there is a risk that lower change in health care costs in the sub-group of patients  
34  
35 412 with high compliance is affected by selection bias. However, we did not find clinically relevant  
36  
37  
38 413 health status differences at baseline among those not providing information on compliance  
39  
40 414 compared to those with this information (data not shown).  
41  
42  
43 415  
44  
45

46 416 The current study is based on real-world outcome data collected in nationwide physiotherapy clinics  
47  
48 417 and actual health care costs retrieved from national registries, supporting the generalizability of the  
49  
50  
51 418 results. However, patients attending GLA:D® are a preselected group of patients who are commonly  
52  
53 419 referred to physiotherapy for their symptoms with most being able to pay partly for the intervention,  
54  
55 420 which might limit the generalizability.  
56  
57

58 421  
59  
60

1  
2  
3  
4 422 **CONCLUSIONS**

5  
6  
7 423

8  
9  
10 424 A structured 8-week supervised education and exercise therapy program delivered in physiotherapy  
11  
12 425 practice was cost-effective at one year in patients with knee and hip OA compared to conventional  
13  
14  
15 426 willingness-to-pay thresholds. Both health-related QOL and health care costs increased during the  
16  
17 427 one-year time horizon, the latter mainly due to knee or hip surgeries. The results support large scale  
18  
19 428 implementation of a structured supervised evidence-based patient education and exercise therapy  
20  
21  
22 429 program targeting patients with knee or hip OA and can guide clinicians and decision makers on  
23  
24 430 what to expect when such programs are implemented in clinical practice.  
25  
26

27 431  
28  
29  
30  
31  
32  
33  
34  
35  
36  
37  
38  
39  
40  
41  
42  
43  
44  
45  
46  
47  
48  
49  
50  
51  
52  
53  
54  
55  
56  
57  
58  
59  
60

## ACKNOWLEDGMENTS

The authors would like to thank the clinicians and patients involved in collecting data for GLA:D®.

## PATIENT AND PUBLIC INVOLVEMENT STATEMENT

Patients and the public were not involved in the design, conduct, reporting, or dissemination plans of this research.

## DATA SHARING STATEMENT

The data from the national Danish registries used in this study is available from Statistics Denmark. However, restrictions apply to the availability, as the data was used under license for the current study, and so are not publicly available. Data are however available from the authors ER and STS upon reasonable request and with permission of Statistics Denmark.

## AUTHOR CONTRIBUTIONS

Study conception and design: DTG, ER, RI, JK, STS

Acquisition of data: DTG, ER, STS

Analysis and interpretation of data: DTG, ER, RI, JK, STS



1  
2  
3  
4 451 Drafting the article: DTG, STS  
5  
6

7 452 Revising the article critically for important intellectual content: DTG, ER, RI, JK, STS  
8  
9

10 453 Final approval of the article: DTG, ER, RI, JK, STS  
11  
12

13 454 Obtaining of funding: STS  
14  
15  
16  
17 455  
18  
19

## 20 456 **ROLE OF THE FUNDING SOURCE** 21 22 23

24 457  
25  
26  
27 458 This work was supported by the Danish Rheumatism Association and the Physiotherapy Practice  
28  
29 459 Foundation. Grant numbers not applicable.  
30  
31

32 460 The Danish Physiotherapist Association's fund for research, education and practice development;  
33  
34 461 the Danish Rheumatism Association; and the Physiotherapy Practice Foundation have previously  
35  
36 462 supported GLA:D®.  
37  
38  
39

40 463  
41  
42  
43 464 Dr. Skou is currently funded by a grant from Region Zealand (Exercise First) and a grant from the  
44  
45 465 European Research Council (ERC) under the European Union's Horizon 2020 research and  
46  
47 466 innovation program (grant agreement No 801790).  
48  
49  
50

51 467  
52  
53 468 None of the funding sources had any role in the study other than to provide funding.  
54  
55  
56  
57 469  
58  
59  
60

## CONFLICT OF INTEREST

Dr. Roos is deputy editor of Osteoarthritis and Cartilage, the developer of the Knee injury and Osteoarthritis Outcome Score (KOOS) and several other freely available patient-reported outcome measures and co-founder of Good Life with osteoArthritis in Denmark (GLA:D<sup>®</sup>), a not-for profit initiative hosted at University of Southern Denmark aimed at implementing clinical guidelines for osteoarthritis in clinical practice.

Dr. Skou is associate editor of the Journal of Orthopaedic & Sports Physical Therapy, has received grants from The Lundbeck Foundation, personal fees from Munksgaard, all of which are outside the submitted work. He is co-founder of GLA:D<sup>®</sup>.

R Ibsen: None

J Kjellberg: None

Dr. Grønne is employed as data manager in the GLA:D<sup>®</sup> project.

1  
2  
3  
4 **REFERENCES**

- 5 487  
6  
7  
8 488  
9  
10  
11 489 1. Hunter DJ, Schofield D, Callander E. The individual and socioeconomic impact of osteoarthritis. *Nature*  
12  
13 490 *reviews Rheumatology* 2014;10(7):437-41. doi: 10.1038/nrrheum.2014.44 [published Online First:  
14  
15 491 2014/03/26]
- 16  
17 492 2. Kingsbury SR, Gross HJ, Isherwood G, et al. Osteoarthritis in Europe: impact on health status, work  
18  
19  
20 493 productivity and use of pharmacotherapies in five European countries. *Rheumatology (Oxford,*  
21  
22 494 *England)* 2014;53(5):937-47. doi: 10.1093/rheumatology/ket463 [published Online First:  
23  
24 495 2014/02/04]
- 25  
26 496 3. Salmon JH, Rat AC, Sellam J, et al. Economic impact of lower-limb osteoarthritis worldwide: a systematic  
27  
28  
29 497 review of cost-of-illness studies. *Osteoarthritis and cartilage* 2016;24(9):1500-8. doi:  
30  
31 498 10.1016/j.joca.2016.03.012 [published Online First: 2016/04/02]
- 32  
33 499 4. Saeid Safiri A-AK, Emma Smith, Catherine Hill, Deepti Bettampadi, Mohammad Ali Mansournia, Damian  
34  
35 500 Hoy, Ahad Ashrafi-Asgarabad, Mahdi Sepidarkish, Amir Almasi-Hashiani, Gary Collins, Jay Kaufman,  
36  
37 501 Mostafa Qorbani, Maziar Moradi-Lakeh, Anthony D Woolf, Francis Guillemin, Lyn March, Marita  
38  
39 502 Cross. Global, Regional and National Burden of Osteoarthritis 1990-2017: A Systematic Analysis of  
40  
41  
42 503 the Global Burden of Disease Study 2017. *Ann Rheum Dis* 2020;79(6):9. doi: 10.1136/annrheumdis-  
43  
44 504 2019-216515 [published Online First: 2020 May 12]
- 45  
46 505 5. Fernandes L, Hagen KB, Bijlsma JW, et al. EULAR recommendations for the non-pharmacological core  
47  
48  
49 506 management of hip and knee osteoarthritis. *Annals of the rheumatic diseases* 2013;72(7):1125-35.  
50  
51 507 doi: 10.1136/annrheumdis-2012-202745 [published Online First: 2013/04/19]
- 52  
53 508 6. Bannuru RR, Osani MC, Vaysbrot EE, et al. OARSI guidelines for the non-surgical management of knee,  
54  
55 509 hip, and polyarticular osteoarthritis. *Osteoarthritis and cartilage / OARS, Osteoarthritis Research*  
56  
57 510 *Society* 2019;27(11):1578-89. doi: 10.1016/j.joca.2019.06.011 [published Online First: 2019/07/07]
- 58  
59  
60

1  
2  
3  
4  
5  
6  
7  
8  
9  
10  
11  
12  
13  
14  
15  
16  
17  
18  
19  
20  
21  
22  
23  
24  
25  
26  
27  
28  
29  
30  
31  
32  
33  
34  
35  
36  
37  
38  
39  
40  
41  
42  
43  
44  
45  
46  
47  
48  
49  
50  
51  
52  
53  
54  
55  
56  
57  
58  
59  
60

- 511 7. Nelson AE, Allen KD, Golightly YM, et al. A systematic review of recommendations and guidelines for the  
512 management of osteoarthritis: The chronic osteoarthritis management initiative of the U.S. bone  
513 and joint initiative. *Semin Arthritis Rheum* 2014;43(6):701-12. doi:  
514 10.1016/j.semarthrit.2013.11.012 [published Online First: 2014/01/07]
- 515 8. Kolasinski SL, Neogi T, Hochberg MC, et al. 2019 American College of Rheumatology/Arthritis Foundation  
516 Guideline for the Management of Osteoarthritis of the Hand, Hip, and Knee. *Arthritis &*  
517 *rheumatology (Hoboken, NJ)* 2020;72(2):220-33. doi: 10.1002/art.41142 [published Online First:  
518 2020/01/08]
- 519 9. Fransen M, McConnell S, Harmer AR, et al. Exercise for osteoarthritis of the knee: a Cochrane systematic  
520 review. *British journal of sports medicine* 2015;49(24):1554-7. doi: 10.1136/bjsports-2015-095424  
521 [published Online First: 2015/09/26]
- 522 10. Fransen M, McConnell S, Hernandez-Molina G, et al. Exercise for osteoarthritis of the hip. *The Cochrane*  
523 *database of systematic reviews* 2014(4):Cd007912. doi: 10.1002/14651858.CD007912.pub2  
524 [published Online First: 2014/04/24]
- 525 11. Hagen KB, Smedslund G, Østerås N, et al. Quality of Community-Based Osteoarthritis Care: A Systematic  
526 Review and Meta-Analysis. *Arthritis care & research* 2016;68(10):1443-52. doi: 10.1002/acr.22891  
527 [published Online First: 2016/03/19]
- 528 12. Smith T, Collier TS, Smith B, et al. Who seeks physiotherapy or exercise treatment for hip and knee  
529 osteoarthritis? A cross-sectional analysis of the English Longitudinal Study of Ageing. *International*  
530 *journal of rheumatic diseases* 2019;22(5):897-904. doi: 10.1111/1756-185x.13480 [published  
531 Online First: 2019/02/08]
- 532 13. Skou ST RE. Good Life with osteoArthritis in Denmark (GLA:D): evidence-based education and  
533 supervised neuromuscular exercise delivered by certified physiotherapists nationwide. *BMC*  
534 *Musculoskelet Disord* 2017;18:72.

1  
2  
3  
4  
5  
6  
7  
8  
9  
10  
11  
12  
13  
14  
15  
16  
17  
18  
19  
20  
21  
22  
23  
24  
25  
26  
27  
28  
29  
30  
31  
32  
33  
34  
35  
36  
37  
38  
39  
40  
41  
42  
43  
44  
45  
46  
47  
48  
49  
50  
51  
52  
53  
54  
55  
56  
57  
58  
59  
60

- 535 14. Mazzei DR, Ademola A, Abbott JH, et al. Are education, exercise and diet interventions a cost-effective  
536 treatment to manage hip and knee osteoarthritis? A systematic review. *Osteoarthritis and cartilage*  
537 2020 doi: 10.1016/j.joca.2020.10.002 [published Online First: 2020/11/17]
- 538 15. Skou ST, Roos EM, Laursen M, et al. Cost-effectiveness of 12 weeks of supervised treatment compared  
539 to written advice in patients with knee osteoarthritis: a secondary analysis of the 2-year outcome  
540 from a randomized trial. *Osteoarthritis and cartilage* 2020;28(7):907-16. doi:  
541 10.1016/j.joca.2020.03.009 [published Online First: 2020/04/04]
- 542 16. Don Husereau MD, Chris Carswell, David Moher, Dan Greenberg, Federico Augustovski, Andrew H  
543 Briggs, William R Lindsay, Josephine Mauskopf, Elizabeth Loder. Consolidated Health Economic  
544 Evaluation Reporting Standards (CHEERS) statement. *BMJ* 2013;346:f1049.
- 545 17. Sanders GD, Neumann PJ, Basu A, et al. Recommendations for Conduct, Methodological Practices, and  
546 Reporting of Cost-effectiveness Analyses: Second Panel on Cost-Effectiveness in Health and  
547 Medicine. *Jama* 2016;316(10):1093-103. doi: 10.1001/jama.2016.12195 [published Online First:  
548 2016/09/14]
- 549 18. Ageberg E LA, Roos EM. Feasibility of neuromuscular training in patients with severe hip or knee OA: the  
550 individualized goal-based NEMEX-TJR training program. *BMC Musculoskelet Disord* 2010;11:126.
- 551 19. Ageberg E RE. Neuromuscular exercise as treatment of degenerative knee disease. *Exerc Sport Sci Rev*  
552 2015(43):14.
- 553 20. Zhang W, Doherty Ma, Peat G, et al. EULAR evidence-based recommendations for the diagnosis of knee  
554 osteoarthritis. *Annals of the rheumatic diseases* 2010;69(3):483-89.
- 555 21. Knee osteoarthritis - national clinical guidelines and referral guidelines: The Danish Health Authority,  
556 2012.
- 557 22. Schmidt M, Schmidt SAJ, Adelborg K, et al. The Danish health care system and epidemiological research:  
558 from health care contacts to database records. *Clinical epidemiology* 2019;11:563-91. doi:  
559 10.2147/clep.S179083 [published Online First: 2019/08/03]

1  
2  
3  
4  
5  
6  
7  
8  
9  
10  
11  
12  
13  
14  
15  
16  
17  
18  
19  
20  
21  
22  
23  
24  
25  
26  
27  
28  
29  
30  
31  
32  
33  
34  
35  
36  
37  
38  
39  
40  
41  
42  
43  
44  
45  
46  
47  
48  
49  
50  
51  
52  
53  
54  
55  
56  
57  
58  
59  
60

23. Wittrup-Jensen KU, Lauridsen J, Gudex C, et al. Generation of a Danish TTO value set for EQ-5D health states. *Scandinavian journal of public health* 2009;37(5):459-66. doi: 10.1177/1403494809105287 [published Online First: 2009/05/05]
24. Bilbao A, García-Pérez L, Arenaza JC, et al. Psychometric properties of the EQ-5D-5L in patients with hip or knee osteoarthritis: reliability, validity and responsiveness. *Qual Life Res* 2018;27(11):2897-908. doi: 10.1007/s11136-018-1929-x [published Online First: 2018/07/05]
25. National Institute for Health and Care Excellence (NICE). *NICE Process and Methods Guides. Guide to the Methods of Technology Appraisal* 2013. London: National Institute for Health and Care Excellence (NICE)
- Copyright © 2013 National Institute for Health and Clinical Excellence, unless otherwise stated. All rights reserved. 2013.
26. Neumann PJ, Cohen JT, Weinstein MC. Updating cost-effectiveness--the curious resilience of the \$50,000-per-QALY threshold. *The New England journal of medicine* 2014;371(9):796-7. doi: 10.1056/NEJMp1405158 [published Online First: 2014/08/28]
27. Faria R, Gomes M, Epstein D, et al. A guide to handling missing data in cost-effectiveness analysis conducted within randomised controlled trials. *Pharmacoeconomics* 2014;32(12):1157-70. doi: 10.1007/s40273-014-0193-3
28. Losina E, Ranstam J, Collins JE, et al. OARSI Clinical Trials Recommendations: Key analytic considerations in design, analysis, and reporting of randomized controlled trials in osteoarthritis. *Osteoarthritis and cartilage* 2015;23(5):677-85. doi: 10.1016/j.joca.2015.03.011
29. Altman DG, Bland JM. Missing data. *Bmj* 2007;334(7590):424. doi: 10.1136/bmj.38977.682025.2C [published Online First: 2007/02/27]
30. White IR, Royston P, Wood AM. Multiple imputation using chained equations: Issues and guidance for practice. *Stat Med* 2011;30(4):377-99. doi: 10.1002/sim.4067 [published Online First: 2010/11/30]

1  
2  
3  
4  
5  
6  
7  
8  
9  
10  
11  
12  
13  
14  
15  
16  
17  
18  
19  
20  
21  
22  
23  
24  
25  
26  
27  
28  
29  
30  
31  
32  
33  
34  
35  
36  
37  
38  
39  
40  
41  
42  
43  
44  
45  
46  
47  
48  
49  
50  
51  
52  
53  
54  
55  
56  
57  
58  
59  
60

- 583 31. Structured Education and Neuromuscular Exercise Program for Hip and/or Knee Osteoarthritis: A Health  
584 Technology Assessment. *Ontario health technology assessment series* 2018;18(8):1-110. [published  
585 Online First: 2018/11/18]
- 586 32. Abbott JH, Wilson R, Pinto D, et al. Incremental clinical effectiveness and cost effectiveness of providing  
587 supervised physiotherapy in addition to usual medical care in patients with osteoarthritis of the hip  
588 or knee: 2-year results of the MOA randomised controlled trial. *Osteoarthritis and cartilage*  
589 2019;27(3):424-34. doi: 10.1016/j.joca.2018.12.004 [published Online First: 2018/12/17]
- 590 33. Richardson G, Hawkins N, McCarthy CJ, et al. Cost-effectiveness of a supplementary class-based  
591 exercise program in the treatment of knee osteoarthritis. *International journal of technology*  
592 *assessment in health care* 2006;22(1):84-9. doi: 10.1017/s0266462306050872 [published Online  
593 First: 2006/05/06]
- 594 34. Tan SS, Teirlinck CH, Dekker J, et al. Cost-utility of exercise therapy in patients with hip osteoarthritis in  
595 primary care. *Osteoarthritis and cartilage* 2016;24(4):581-8. doi: 10.1016/j.joca.2015.11.010  
596 [published Online First: 2015/12/02]
- 597 35. Losina E, Smith KC, Paltiel AD, et al. Cost-Effectiveness of Diet and Exercise for Overweight and Obese  
598 Patients With Knee Osteoarthritis. *Arthritis care & research* 2019;71(7):855-64. doi:  
599 10.1002/acr.23716 [published Online First: 2018/07/29]
- 600 36. Hunter DJ, Bierma-Zeinstra S. Osteoarthritis. *Lancet (London, England)* 2019;393(10182):1745-59. doi:  
601 10.1016/s0140-6736(19)30417-9 [published Online First: 2019/04/30]
- 602 37. Ferket BS, Feldman Z, Zhou J, et al. Impact of total knee replacement practice: cost effectiveness  
603 analysis of data from the Osteoarthritis Initiative. *Bmj* 2017;356:j1131. doi: 10.1136/bmj.j1131  
604 [published Online First: 2017/03/30]
- 605 38. Skou ST, Roos EM, Laursen MB, et al. A Randomized, Controlled Trial of Total Knee Replacement. *The*  
606 *New England journal of medicine* 2015;373(17):1597-606. doi: 10.1056/NEJMoa1505467 [published  
607 Online First: 2015/10/22]

1  
2  
3  
4  
5  
6  
7  
8  
9  
10  
11  
12  
13  
14  
15  
16  
17  
18  
19  
20  
21  
22  
23  
24  
25  
26  
27  
28  
29  
30  
31  
32  
33  
34  
35  
36  
37  
38  
39  
40  
41  
42  
43  
44  
45  
46  
47  
48  
49  
50  
51  
52  
53  
54  
55  
56  
57  
58  
59  
60

39. Svege I, Nordsletten L, Fernandes L, et al. Exercise therapy may postpone total hip replacement surgery in patients with hip osteoarthritis: a long-term follow-up of a randomised trial. *Ann Rheum Dis* 2015;74(1):164-9. doi: 10.1136/annrheumdis-2013-203628 [published Online First: 2013/11/21]
40. Skou ST, Roos EM, Laursen MB, et al. Total knee replacement and non-surgical treatment of knee osteoarthritis: 2-year outcome from two parallel randomized controlled trials. *Osteoarthritis and cartilage* 2018;26(9):1170-80. doi: 10.1016/j.joca.2018.04.014 [published Online First: 2018/05/04]
41. Fernandes L, Roos EM, Overgaard S, et al. Supervised neuromuscular exercise prior to hip and knee replacement: 12-month clinical effect and cost-utility analysis alongside a randomised controlled trial. *BMC Musculoskelet Disord* 2017;18(1):5. doi: 10.1186/s12891-016-1369-0 [published Online First: 2017/01/08]
42. Ilana N. Ackerman STS, Ewa M. Roos, Christian J. Barton, Joanne L. Kemp, Kay M. Crossley, Danny Liew, Zanfina Ademi. Implementing a national first-line management program for moderate-severe knee osteoarthritis in Australia: A budget impact analysis focusing on knee replacement avoidance. *Osteoarthritis and Cartilage Open* 2020 doi: <https://doi.org/10.1016/j.ocarto.2020.100070>
43. Juhl C, Christensen R, Roos EM, et al. Impact of exercise type and dose on pain and disability in knee osteoarthritis: a systematic review and meta-regression analysis of randomized controlled trials. *Arthritis & rheumatology (Hoboken, NJ)* 2014;66(3):622-36. doi: 10.1002/art.38290 [published Online First: 2014/02/28]
44. Moseng T, Dagfinrud H, Smedslund G, et al. The importance of dose in land-based supervised exercise for people with hip osteoarthritis. A systematic review and meta-analysis. *Osteoarthritis and cartilage* 2017;25(10):1563-76. doi: 10.1016/j.joca.2017.06.004 [published Online First: 2017/06/27]
45. Regnaud JP, Lefevre-Colau MM, Trinquart L, et al. High-intensity versus low-intensity physical activity or exercise in people with hip or knee osteoarthritis. *The Cochrane database of systematic reviews* 2015(10):Cd010203. doi: 10.1002/14651858.CD010203.pub2 [published Online First: 2015/10/30]



1  
2  
3  
4  
5  
6  
7  
8  
9  
10  
11  
12  
13  
14  
15  
16  
17  
18  
19  
20  
21  
22  
23  
24  
25  
26  
27  
28  
29  
30  
31  
32  
33  
34  
35  
36  
37  
38  
39  
40  
41  
42  
43  
44  
45  
46  
47  
48  
49  
50  
51  
52  
53  
54  
55  
56  
57  
58  
59  
60

- 633 46. Woods B, Revall P, Sculpher M, et al. Country-Level Cost-Effectiveness Thresholds: Initial Estimates and  
634 the Need for Further Research. *Value in health : the journal of the International Society for*  
635 *Pharmacoeconomics and Outcomes Research* 2016;19(8):929-35. doi: 10.1016/j.jval.2016.02.017  
636 [published Online First: 2016/12/19]
- 637 47. Pottegård A, Schmidt SAJ, Wallach-Kildemoes H, et al. Data Resource Profile: The Danish National  
638 Prescription Registry. *International journal of epidemiology* 2017;46(3):798-98f. doi:  
639 10.1093/ije/dyw213 [published Online First: 2016/10/30]
- 640 48. Schmidt M, Schmidt SA, Sandegaard JL, et al. The Danish National Patient Registry: a review of content,  
641 data quality, and research potential. *Clinical epidemiology* 2015;7:449-90. doi: 10.2147/clep.S91125  
642 [published Online First: 2015/11/26]
- 643 49. Christensen K, Doblhammer G, Rau R, et al. Ageing populations: the challenges ahead. *Lancet (London,*  
644 *England)* 2009;374(9696):1196-208. doi: 10.1016/s0140-6736(09)61460-4 [published Online First:  
645 2009/10/06]
- 646 50. Silva GS, Sullivan JK, Katz JN, et al. Long-term clinical and economic outcomes of a short-term physical  
647 activity program in knee osteoarthritis patients. *Osteoarthritis and cartilage* 2020;28(6):735-43.  
648 doi: 10.1016/j.joca.2020.01.017 [published Online First: 2020/03/15]

1  
2  
3  
4  
5 650 **TABLE LEGENDS**  
6  
7

8 651 Table 1. Baseline characteristics in knee and hip patients attending GLA:D®  
9

10  
11 652 Table 2. Predicted public transfer payments one year prior to and one or three years following  
12  
13 653 GLA:D® for knee and hip patients  
14  
15

16 654 Table 3. Change in health-related quality of life from baseline to 12 months for knee and hip  
17  
18 655 patients attending GLA:D®  
19

20  
21 656 Table 4. Adjusted and raw estimated health care costs per QALY from baseline to 12 months for all  
22  
23 657 knee and hip patients attending GLA:D® and for knee and hip patients with high compliance  
24  
25

26  
27 658  
28  
29  
30  
31  
32  
33  
34  
35  
36  
37  
38  
39  
40  
41  
42  
43  
44  
45  
46  
47  
48  
49  
50  
51  
52  
53  
54  
55  
56  
57  
58  
59  
60

659 **Table 1. Baseline characteristics in knee and hip patients attending GLA:D®**

|                                                                     | <b>Knee<br/>(n: 12,162)</b> | <b>Hip<br/>(n: 4,093)</b> |
|---------------------------------------------------------------------|-----------------------------|---------------------------|
| <b>Age</b> (years), mean (SD)                                       | 64.1 (9.8)                  | 65.7 (9.4)                |
| <b>Gender</b> (Female), % (n)                                       | 73.1 (8,887)                | 73.6 (3,014)              |
| <b>BMI</b> (kg/m <sup>2</sup> ), mean (SD)                          | 28.6 (5.3)                  | 26.9 (4.6)                |
| <b>Marital status</b> , % (n)                                       |                             |                           |
| Married or living with others                                       | 72.4 (8,803)                | 70.7 (1,079)              |
| Single                                                              | 27.6 (3,359)                | 29.3 (1,200)              |
| <b>Ethnic background</b> , % (n)                                    |                             |                           |
| Danish                                                              | 96.2 (11,701)               | 96.8 (3,961)              |
| Other western                                                       | 2.5 (299)                   | 2.6 (106)                 |
| Not western                                                         | 1.3 (160)                   | 0.6 (25)                  |
| <b>Educational level</b> , % (n)                                    |                             |                           |
| Primary                                                             | 18.7 (2,277)                | 19.7 (1,493)              |
| Secondary                                                           | 3.0 (367)                   | 2.7 (112)                 |
| Vocational                                                          | 39.1 (4,761)                | 36.2 (1,481)              |
| Short-term                                                          | 4.6 (558)                   | 4.5 (185)                 |
| Bachelor                                                            | 26.2 (3,186)                | 28.0 (1,145)              |
| Long-term                                                           | 7.2 (873)                   | 8.0 (329)                 |
| Unknown                                                             | 1.2 (140)                   | 0.9 (35)                  |
| <b>Social status</b> , % (n)                                        |                             |                           |
| Employed                                                            | 43.3 (5,264)                | 36.5 (1,493)              |
| Unemployed                                                          | 2.1 (256)                   | 1.5 (61)                  |
| Sick pay (public funded)                                            | 0.7 (86)                    | 0.4 (15)                  |
| Disability pension                                                  | 3.7 (444)                   | 3.7 (152)                 |
| Early retirement                                                    | 6.3 (766)                   | 7.3 (297)                 |
| Age pension                                                         | 42.8 (5,209)                | 49.5 (2,028)              |
| Other                                                               | 1.1 (137)                   | 1.1 (47)                  |
| <b>Administrative region</b> , % (n)                                |                             |                           |
| Capital Region                                                      | 27.7 (3,367)                | 27.6 (1,131)              |
| Region Zealand                                                      | 13.0 (1,578)                | 13.1 (535)                |
| Region of Southern Denmark                                          | 21.8 (2,654)                | 25.2 (1,030)              |
| <b>Central Denmark Region</b>                                       | 25.4 (3,085)                | 24.9 (1,021)              |
| <b>North Denmark Region</b>                                         | 12.2 (1,478)                | 9.2 (376)                 |
| <b>Number of comorbidities</b> <sup>%, % (n)</sup>                  |                             |                           |
| 0                                                                   | 38.2 (4,367)                | 39.7 (1,533)              |
| 1                                                                   | 35.7 (4,076)                | 35.1 (1,358)              |
| 2                                                                   | 17.3 (1,979)                | 16.8 (649)                |
| 3 or more                                                           | 8.8 (1,006)                 | 8.4 (326)                 |
| <b>Symptom duration</b> (months), median (IQR)                      | 24 (7-60)                   | 24 (8-48)                 |
| <b>Pain intensity</b> (VAS 0-100, best to worst), mean (SD)         | 48.6 (22.0)                 | 47.6 (21.7)               |
| <b>Bilateral symptoms</b> , % (n)                                   | 46.3 (5,614)                | 26.1 (1,064)              |
| <b>Walk speed</b> <sup>#</sup> (m/sec), mean (SD)                   | 1.49 (0.33)                 | 1.49 (0.34)               |
| <b>Previous surgery in worst joint</b> <sup>&amp;</sup> , % (n)     | 30.7 (3,725)                | 4.0 (161)                 |
| <b>Use of pain medication</b> <sup>□</sup> (yes), % (n)             |                             |                           |
| Overall                                                             | 61.3 (7,431)                | 64.2 (2,629)              |
| Paracetamol                                                         | 49.9 (6,073)                | 53.3 (2,184)              |
| NSAIDs                                                              | 35.6 (4,325)                | 34.6 (1,419)              |
| Opioids                                                             | 7.1 (868)                   | 9.0 (367)                 |
| <b>KOOS/HOOS QOL</b> <sup>*</sup> (0-100, best to worst), mean (SD) | 45.2 (14.7)                 | 47.4 (15.1)               |

660 Missing values: BMI n: 5 (knee), n: 7 (hip); Number of comorbidities n: 711 (knee), n: 215 (hip); Symptom duration  
661 (mainly missing due to technical problems): n: 3,157 (knee), n: 1,096 (hip) ; Pain intensity: n:23 (knee), n:9 (hip) ;  
662 Bilateral symptoms: n:32 (knee), n:20 (hip) ; Walk speed: n:610 (knee), n:221 (hip); KOOS/HOOS QOL: n: 36 (knee),

1  
2  
3  
4  
5  
6  
7  
8  
9  
10  
11  
12  
13  
14  
15  
16  
17  
18  
19  
20  
21  
22  
23  
24  
25  
26  
27  
28  
29  
30  
31  
32  
33  
34  
35  
36  
37  
38  
39  
40  
41  
42  
43  
44  
45  
46  
47  
48  
49  
50  
51  
52  
53  
54  
55  
56  
57  
58  
59  
60

663 n: 21 (hip).

664 #Walking speed was assessed with the 40 m Fast-paces Walk Test under instruction of the GLA:D®-therapist

665 □Self-reported use of pain medication during last 3 months

666 %Number of comorbidities calculated from self-report of the following conditions: hypertension, cardiovascular  
667 diseases, lung diseases, diabetes, stomach diseases, liver- or kidney diseases, blood diseases, cancer, depression,  
668 rheumatoid arthritis, neurological disorders, other medical diseases

669 &Self-reported previous surgery in worst joint

670 \*Knee injury and Osteoarthritis Outcome Score or Hip disability or Osteoarthritis Outcome Score Quality Of Life sub-  
671 scale score

For peer review only

672 Table 2. Predicted public transfer payments one year prior to and one or three years following GLA:D® for knee and hip patients

|                                  | One-year horizon                             |                       |         |                        |         |                      |                     | Three-year horizon                         |         |                      |         |                      |         |       |
|----------------------------------|----------------------------------------------|-----------------------|---------|------------------------|---------|----------------------|---------------------|--------------------------------------------|---------|----------------------|---------|----------------------|---------|-------|
|                                  | Pre-period (1 year)                          | Post-period (mth 1-3) |         | Post-period (mth 4-12) |         | Post-period (year 1) | Pre-period (1 year) | Post-period (year 1)                       |         | Post-period (year 2) |         | Post-period (year 3) |         |       |
|                                  | Weeks/month                                  | Weeks/month           | p-value | Weeks/month            | p-value | Weeks/month          | Weeks/year          | Weeks/year                                 | p-value | Weeks/year           | p-value | Weeks/year           | p-value |       |
|                                  | <b>Knee patients in workforce (n: 5,586)</b> |                       |         |                        |         |                      |                     | <b>Knee patients in workforce (n: 905)</b> |         |                      |         |                      |         |       |
| <b>Public transfer payments#</b> |                                              |                       |         |                        |         |                      |                     |                                            |         |                      |         |                      |         |       |
| Unemployed                       | 0.24                                         | 0.26                  | 0.000   | 0.27                   | 0.001   | 0.27                 | 0.000               | 3.50                                       | 3.82    | 0.344                | 3.51    | 0.986                | 3.32    | 0.703 |
| Sheltered employment             | 0.10                                         | 0.10                  | 0.959   | 0.10                   | 0.967   | 0.10                 | 0.982               | 1.61                                       | 1.59    | 0.907                | 1.69    | 0.671                | 1.78    | 0.422 |
| Sick pay                         | 0.13                                         | 0.16                  | 0.000   | 0.14                   | 0.164   | 0.15                 | 0.029               | 1.47                                       | 1.70    | 0.295                | 1.54    | 0.789                | 1.16    | 0.201 |
| Rehabilitation                   | 0.01                                         | 0.01                  | 0.254   | 0.01                   | 0.494   | 0.01                 | 0.407               | 0.09                                       | 0.03    | 0.017                | 0.09    | 0.960                | 0.06    | 0.731 |
| Education                        | 0.01                                         | 0.00                  | 0.136   | 0.01                   | 0.950   | 0.00                 | 0.770               | 0.20                                       | 0.18    | 0.507                | 0.23    | 0.690                | 0.20    | 0.991 |
| Disability pension               | 0.23                                         | 0.24                  | 0.006   | 0.23                   | 0.259   | 0.24                 | 0.136               | 6.02                                       | 6.02    | 0.969                | 5.91    | 0.467                | 6.00    | 0.966 |
| Early retirement                 | 0.37                                         | 0.46                  | 0.000   | 0.46                   | 0.000   | 0.46                 | 0.000               | 6.06                                       | 7.35    | 0.000                | 7.02    | 0.071                | 5.44    | 0.354 |
|                                  | <b>Hip patients in workforce (n: 1,543)</b>  |                       |         |                        |         |                      |                     | <b>Hip patients in workforce (n: 264)</b>  |         |                      |         |                      |         |       |
| <b>Public transfer payments§</b> |                                              |                       |         |                        |         |                      |                     |                                            |         |                      |         |                      |         |       |
| Unemployed                       | 0.19                                         | 0.19                  | 0.540   | 0.20                   | 0.309   | 0.20                 | 0.325               | 3.36                                       | 3.56    | 0.730                | 3.20    | 0.865                | 2.90    | 0.672 |
| Sheltered employment             | 0.10                                         | 0.10                  | 0.458   | 0.10                   | 0.516   | 0.10                 | 0.470               | 1.92                                       | 1.80    | 0.712                | 1.50    | 0.217                | 1.73    | 0.661 |
| Sick pay                         | 0.10                                         | 0.13                  | 0.082   | 0.16                   | 0.001   | 0.15                 | 0.003               | 1.38                                       | 2.00    | 0.327                | 1.41    | 0.967                | 1.32    | 0.903 |
| Rehabilitation                   | 0.00                                         | 0.01                  | 0.202   | 0.00                   | 0.407   | 0.00                 | 0.812               | 0.04                                       | 0.06    | 0.000                | 0.19    | 0.000                | 0.41    | 0.000 |
| Education                        | 0.01                                         | 0.01                  | 0.321   | 0.01                   | 0.659   | 0.01                 | 0.557               | 0.27                                       | 0.20    | 0.593                | 0.20    | 0.598                | 0.12    | 0.183 |
| Disability pension               | 0.29                                         | 0.26                  | 0.264   | 0.27                   | 0.502   | 0.27                 | 0.427               | 3.81                                       | 3.92    | 0.501                | 3.66    | 0.673                | 3.29    | 0.171 |
| Early retirement                 | 0.47                                         | 0.59                  | 0.000   | 0.58                   | 0.000   | 0.58                 | 0.000               | 9.02                                       | 11.54   | 0.000                | 10.01   | 0.422                | 7.11    | 0.219 |

673 #Predicted weeks receiving public transfer payments in one-year horizon for women, 55 years, married/co-living, Danish ethnicity, low education and living in the  
674 Capital Region estimated using a generalized estimating equation gamma regression model for repeated measures including sex, age, marital status, ethnicity,  
675 education and region as covariates. Because of no convergence in the model following covariates were omitted: ‘Early retirement’: sex, marital status, ethnicity,  
676 education and region; ‘Rehabilitation’: age, marital status, ethnicity and education; ‘Education’: age, marital status, ethnicity and education. Predicted weeks receiving  
677 public transfer payments in three-year horizon for women, 55 years and low education estimated using a generalized estimating equation gamma regression model for  
678 repeated measures including sex, age and education as covariates. Because of no convergence in the model following covariates were omitted: ‘Sheltered  
679 employment’: sex and education; Disability pension’’: sex and education; ‘Early retirement’: age.

680 §Predicted weeks receiving public transfer payments in one-year horizon for women, 55 years, married/co-living, Danish ethnicity, low education and living in the  
681 Capital Region estimated using a generalized estimating equation gamma regression model for repeated measures including sex, age, marital status, ethnicity,  
682 education and region as covariates. Because of no convergence in the model following covariates were omitted: ‘Early retirement’: sex, marital status, ethnicity,  
683 education and region; ‘Rehabilitation’: age, marital status, ethnicity, education and region; ‘Education’: age, marital status, ethnicity, education and region. Predicted  
684 weeks receiving public transfer payments in three-year horizon for women, 55 years and low education estimated using a generalized estimating equation gamma  
685 regression model for repeated measures including sex, age and education as covariates. Because of no convergence in the model following covariates were omitted:

1  
2 686 'Sheltered employment': sex and education; Disability pension'': sex and education; 'Early retirement': age; 'Rehabilitation': sex, age and education; 'Rehabilitation:  
3 687 sex, age and education.  
4  
5  
6  
7  
8  
9  
10  
11  
12  
13  
14  
15  
16  
17  
18  
19  
20  
21  
22  
23  
24  
25  
26  
27  
28  
29  
30  
31  
32  
33  
34  
35  
36  
37  
38  
39  
40  
41  
42  
43  
44  
45  
46

For peer review only

1  
2  
3  
4  
5  
6  
7  
8  
9  
10  
11  
12  
13  
14  
15  
16  
17  
18  
19  
20  
21  
22  
23  
24  
25  
26  
27  
28  
29  
30  
31  
32  
33  
34  
35  
36  
37  
38  
39  
40  
41  
42  
43  
44  
45  
46  
47  
48  
49  
50  
51  
52  
53  
54  
55  
56  
57  
58  
59  
60

688 **Table 3. Change in health-related quality of life from baseline to 12 months for knee and hip**  
 689 **patients attending GLA:D®**

|             | Knee (n: 12,162 )                         |                    |                     |                      | Hip (n: 4,093)                            |                    |                     |                      |
|-------------|-------------------------------------------|--------------------|---------------------|----------------------|-------------------------------------------|--------------------|---------------------|----------------------|
|             | Pre period<br>QALY<br>(Baseline<br>EQ-5D) | 3 months<br>EQ-5D§ | 12 months<br>EQ-5D§ | Post period<br>QALY# | Pre period<br>QALY<br>(Baseline<br>EQ-5D) | 3 months<br>EQ-5D§ | 12 months<br>EQ-5D§ | Post period<br>QALY# |
| <b>Mean</b> | 0.711                                     | 0.752              | 0.756               | 0.748                | 0.705                                     | 0.733              | 0.747               | 0.735                |
| <b>SD</b>   | 0.113                                     | 0.121              | 0.134               | 0.107                | 0.110                                     | 0.127              | 0.144               | 0.108                |

690 §Missing observations for EQ-5D at 3 and 12 months were imputed by Multiple Imputations

691 #One year post period QALY was calculated as the area under the curve taking both 3- and 12-months measurements  
 692 into account

For peer review only

**Table 4. Adjusted and raw estimated health care costs per QALY from baseline to 12 months for all knee and hip patients attending GLA:D® and for knee and hip patients with high compliance**

|                                      | Knee                                      |                                                |                                      | Hip                                       |                                                |                                      |
|--------------------------------------|-------------------------------------------|------------------------------------------------|--------------------------------------|-------------------------------------------|------------------------------------------------|--------------------------------------|
|                                      | Change in health care costs (€) (95 % CI) | Change in EQ-5D (QALYs) (95 % CI) <sup>§</sup> | Euro pr. QALY (95 % CI) <sup>§</sup> | Change in health care costs (€) (95 % CI) | Change in EQ-5D (QALYs) (95 % CI) <sup>§</sup> | Euro pr. QALY (95 % CI) <sup>§</sup> |
| <b>Adjusted<sup>#</sup></b>          | 298<br>(206-419)                          | 0.035<br>(0.033-0.037)                         | 8,497<br>(6,242-11,324)              | 640<br>(400-1,009)                        | 0.028<br>(0.025-0.032)                         | 22,568<br>(16,000-31,531)            |
| <b>Unadjusted</b>                    | 895<br>(719-1,088)                        | 0.037                                          | 24,236                               | 2,162<br>(1,723-2,671)                    | 0.030                                          | 71,478                               |
| <b>High compliance<sup>#,□</sup></b> | 197<br>(91-360)                           | 0.036<br>(0.033-0.039)                         | 5,438<br>(2,758-9,231)               | 492<br>(241-969)                          | 0.028<br>(0.024-0.033)                         | 17,330<br>(10,041-29,364)            |

<sup>§</sup>Confidence Interval not generated from the MI

<sup>#</sup>Adjusted for age, gender, marital status, ethnicity, educational level and region

<sup>□</sup>High compliance group defined as patients attending minimum 10 supervised exercise sessions



1  
2  
3  
4  
5  
6  
7  
8  
9  
10  
11  
12  
13  
14  
15  
16  
17  
18  
19  
20  
21  
22  
23  
24  
25  
26  
27  
28  
29  
30  
31  
32  
33  
34  
35  
36  
37  
38  
39  
40  
41  
42  
43  
44  
45  
46  
47  
48  
49  
50  
51  
52  
53  
54  
55  
56  
57  
58  
59  
60

700 **FIGURE LEGENDS**

701 Figure 1. Flow chart

702 Figure 2. Predicted healthcare costs and home care costs one year prior to and up to three years  
703 following GLA:D<sup>®</sup> for knee and hip patients

For peer review only

18,218 patients enrolled in GLA:D® between February 4, 2014 and December 31, 2016

1,883 patients did not provide patient reported baseline information

16,335 patients provided baseline information

54 patients did not answer EQ-5D at baseline  
26 did not have a civil registration number (CPR)

12,162 knee patients enrolled in the study

4,093 hip patients enrolled in the study

2,781 knee patients did not answer EQ-5D at 3 m

912 hip patients did not answer EQ-5D at 3 m

4,732 knee patients did not answer EQ-5D at 12 m follow up

1,574 hip patients did not answer EQ-5D at 12 m

6,990 knee patients had complete information on EQ-5D

2,349 hip patients had complete information on EQ-5D

1 **a) Predicted health care costs/year - total**

BMJ Open

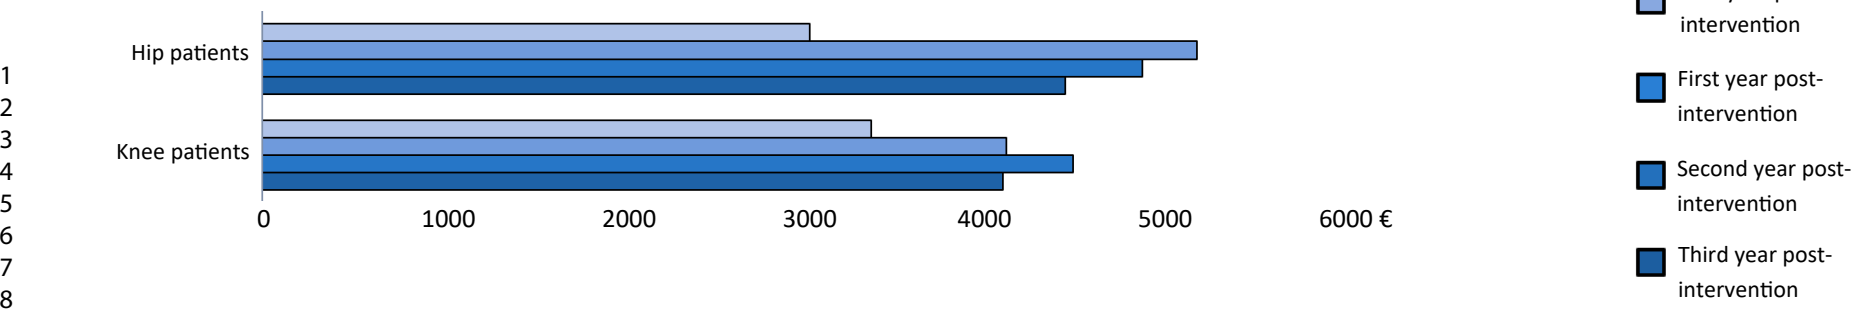

10 **b) Predicted health care costs/year - knee patients**

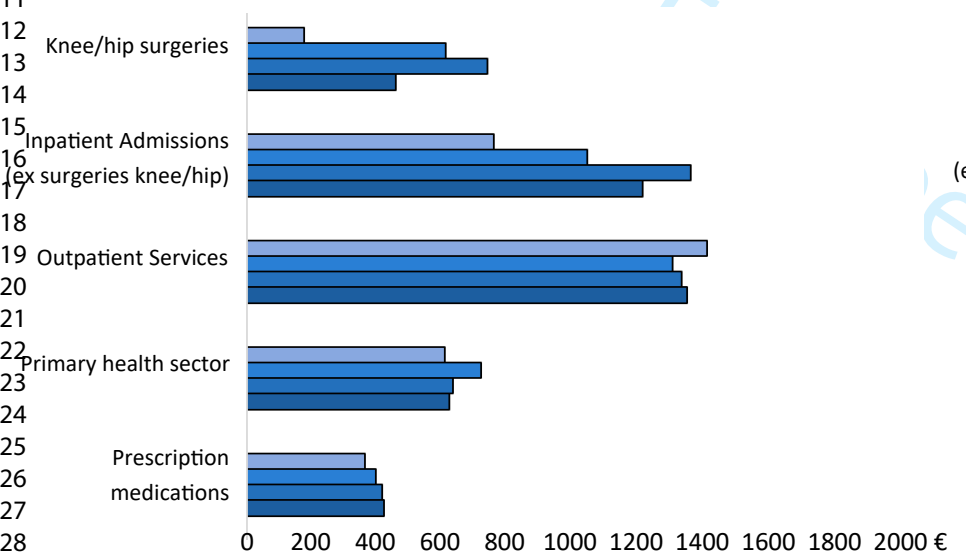

10 **c) Predicted health care costs/year - hip patients**

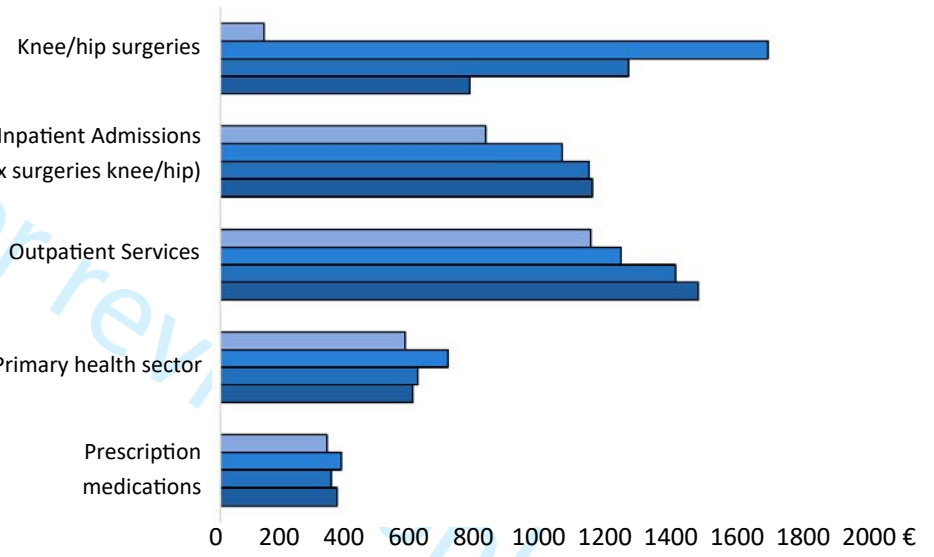

33 **d) Predicted costs/year home care - knee patients**

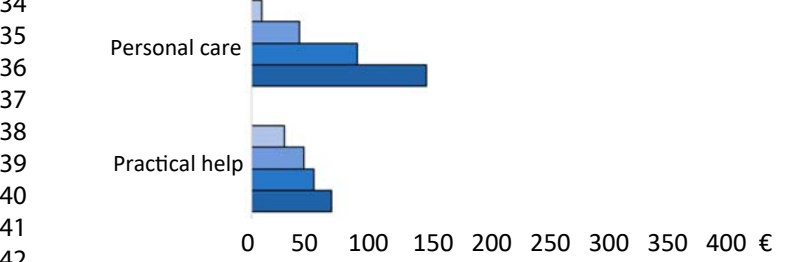

33 **e) Predicted costs/year home care - hip patients**

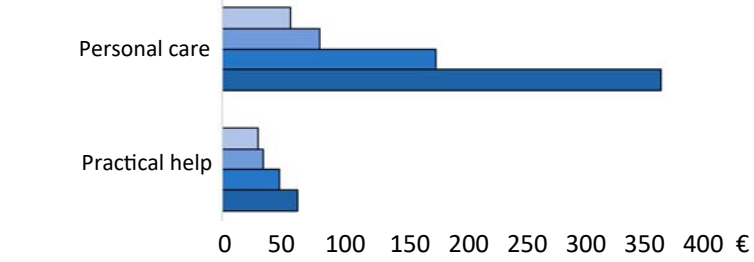

# Supplementary Appendix

Table S1: Baseline characteristics in patients with complete information and patients with loss to follow up

Table S2: Mean health care costs and home care costs one year prior to and one or three years following GLA:D<sup>®</sup> for knee and hip patients

Table S3: Predicted health care costs and home care costs one year prior to and one or three years following GLA:D<sup>®</sup> for knee and hip patients

Table S4: Mean public transfer payments one year prior to and one or three years following GLA:D<sup>®</sup> for knee and hip patients

Table S5. Sensitivity analysis - adjusted estimated health care cost per QALY from baseline to 12 months for knee and hip patients attending GLA:D<sup>®</sup> in private clinics, municipal clinics and patients with complete information

15 **Table S1: Baseline characteristics in patients with complete information and patients who had**  
 16 **incomplete information**

|                                                             | Complete information |                   | Incomplete information |                   |
|-------------------------------------------------------------|----------------------|-------------------|------------------------|-------------------|
|                                                             | Knee<br>(n: 6,990)   | Hip<br>(n: 2,349) | Knee<br>(n: 5,173)     | Hip<br>(n: 1,749) |
| Age (years), mean (SD)                                      | 64.4 (9.1)           | 65.7 (8.7)        | 63.7 (10.7)            | 65.7 (10.3)       |
| Gender (Female), % (n)                                      | 73.2 (5,113)         | 74.6 (1,753)      | 73.0 (3,777)           | 72.2 (1,263)      |
| BMI (kg/m <sup>2</sup> ), mean (SD)                         | 28.4 (5.2)           | 26.6 (4.4)        | 28.9 (5.4)             | 27.2 (4.9)        |
| <b>Marital status, % (n)</b>                                |                      |                   |                        |                   |
| Married or living with others                               | 75 (5,256)           | 73 (1,714)        | 69 (3,547)             | 68 (1,179)        |
| Single                                                      | 25 (1,730)           | 27 (634)          | 31 (1,629)             | 32 (566)          |
| <b>Ethnic background, % (n)</b>                             |                      |                   |                        |                   |
| Danish                                                      | 97 (6,773)           | 97 (2,276)        | 95 (4,928)             | 97 (1,685)        |
| Other western                                               | 2 (160)              | 3 (60)            | 3 (139)                | 3 (46)            |
| Not western                                                 | 1 (53)               | 0.5 (11)          | 2 (107)                | 0.8 (14)          |
| <b>Educational level, % (n)</b>                             |                      |                   |                        |                   |
| Primary                                                     | 17 (1,177)           | 18 (420)          | 21 (1,100)             | 22 (386)          |
| Secondary                                                   | 3 (197)              | 3 (69)            | 3 (170)                | 2 (43)            |
| Vocational                                                  | 38 (2,671)           | 34 (792)          | 40 (2,090)             | 39 (689)          |
| Short-term                                                  | 5 (322)              | 5 (123)           | 5 (236)                | 4 (62)            |
| Bachelor                                                    | 28 (1,999)           | 31 (722)          | 31 (1,187)             | 24 (423)          |
| Long-term                                                   | 8 (546)              | 9 (200)           | 9 (327)                | 7 (129)           |
| Unknown                                                     | 1 (74)               | 1 (22)            | 1 (66)                 | 1 (13)            |
| <b>Social status, % (n)</b>                                 |                      |                   |                        |                   |
| Employed                                                    | 44 (3,012)           | 37 (866)          | 44 (2,252)             | 37 (627)          |
| Unemployed                                                  | 0.5 (35)             | 0.3 (6)           | 0.8 (42)               | 0.4 (7)           |
| Sick pay (public funded)                                    | 0.5 (37)             | 0.4 (9)           | 1 (49)                 | 0.3 (6)           |
| Disability pension                                          | 3 (228)              | 3 (76)            | 4 (216)                | 4 (76)            |
| Early retirement                                            | 8 (527)              | 9 (2025)          | 5 (239)                | 6 (95)            |
| Age pension                                                 | 43 (3,006)           | 49 (1,137)        | 43 (2,203)             | 52 (891)          |
| Other                                                       | 1 (69)               | 1 (33)            | 1 (68)                 | 0.8 (14)          |
| <b>Sick leave<sup>†</sup>, % (n)</b>                        | 4.9 (314)            | 3.2 (77)          | 6.8 (353)              | 3.8 (67)          |
| <b>Administrative region, % (n)</b>                         |                      |                   |                        |                   |
| Capital Region                                              | 27 (1,875)           | 26 (606)          | 29 (1,492)             | 30 (525)          |
| Region Zealand                                              | 13 (936)             | 14 (327)          | 12 (642)               | 12 (208)          |
| Region of Southern Denmark                                  | 23 (1,579)           | 26 (602)          | 21 (1,075)             | 25 (428)          |
| Central Denmark Region                                      | 26 (1,796)           | 26 (609)          | 25 (1,275)             | 24 (412)          |
| North Denmark Region                                        | 11 (800)             | 9 (204)           | 13 (1,289)             | 10 (172)          |
| <b>Number of comorbidities<sup>‡</sup>, % (n)</b>           |                      |                   |                        |                   |
| 0                                                           | 39.2 (2,575)         | 41.9 (928)        | 36.9 (1,798)           | 36.5 (608)        |
| 1                                                           | 36.2 (2,381)         | 35.5 (787)        | 35.0 (1,704)           | 34.7 (578)        |
| 2                                                           | 17.0 (1,118)         | 15.8 (350)        | 17.8 (867)             | 18.1 (302)        |
| 3 or more                                                   | 7.7 (504)            | 6.9 (152)678      | 10.4 (505)             | 10.7 (178)        |
| <b>Symptom duration (months), median (IQR)</b>              | 24 (7-60)            | 24 (8-48)         | 24 (7-60)              | 24 (8-48)         |
| <b>Pain intensity (VAS 0-100, best to worst), mean (SD)</b> | 47.3 (21.8)          | 45.9 (21.4)       | 50.3 (22.3)            | 49.7 (22.0)       |
| <b>Bilateral symptoms, % (n)</b>                            | 46.7 (3,259)         | 26.6 (622)        | 45.7 (2,355)           | 25.4 (442)        |
| <b>Walk speed<sup>#</sup> (m/sec), mean (SD)</b>            | 1.51 (0.32)          | 1.52 (0.33)       | 1.46 (0.35)            | 1.45 (0.35)       |

|                                                                    |              |              |               |              |
|--------------------------------------------------------------------|--------------|--------------|---------------|--------------|
| <b>Previous surgery in worst joint<sup>&amp;</sup>, % (n)</b>      | 30.2 (2,112) | 3.2 (78)     | 31.3 (1,619)  | 4.8 (84)     |
| <b>Receive home care, % (n)</b>                                    | 8.9 (621)    | 9.6 (224)    | 11.5 (593)    | 12.4 (215)   |
| <b>Use of pain medication<sup>o</sup> (yes), % (n)</b>             |              |              |               |              |
| Overall                                                            | 60.9 (4,256) | 62.7 (1,473) | 61.8 (3,196)  | 66.1 (1,156) |
| Paracetamol                                                        | 49.5 (3,463) | 52.9 (1,243) | 50.5 (2,610)  | 53.8 (941)   |
| NSAIDs                                                             | 35.8 (2,504) | 32.5 (764)   | 35.2 (1,1821) | 37.5 (655)   |
| Opioids                                                            | 6.6 (459)    | 8.1 (190)    | 7.9 (409)     | 10.1 (177)   |
| <b>KOOS/HOOS QOL<sup>*</sup> (0-100, best to worst), mean (SD)</b> | 46.0 (14.5)  | 47.9 (15.0)  | 44.1 (15.0)   | 46.7 (15.3)  |

Missing values: BMI: n: 2 (knee, complete), n: 5 (hip, complete), n: 3 (knee, incomplete), n: 2 (hip, incomplete); Ethnic background: n: 1 (hip, complete), n: 2 (knee, incomplete); Social status: n: 72 (knee, complete), n: 19 (hip, complete), n: 107 (knee, incomplete), n: 29 (hip, incomplete); Sick leave: n: 6 (knee, complete), n: 1 (hip, complete), n: 19 (knee, incomplete), n: 3 (hip, incomplete); Number of comorbidities: n: 412 (knee, complete), n: 132 (hip, complete), n: 299 (knee, incomplete), n: 83 (hip, incomplete); Symptom duration (mainly missing due to technical problems): n: 1.730 (knee, complete), n: 595 (hip, complete), n: 1.427 (knee, incomplete), n: 501 (hip, incomplete); Pain intensity: n: 8 (knee, complete), n: 3 (hip, complete), n: 15 (knee, incomplete), n: 6 (hip, incomplete); Bilateral symptoms: n: 14 (knee, complete), n: 10 (hip, complete), n: 18 (knee, incomplete), n: 10 (hip, incomplete); Walk speed: n: 309 (knee, complete), n: 100 (hip, complete), n: 301 (knee, incomplete), n: 121 (hip, incomplete); Receive home care: n: 31 (knee, complete), n: 8 (hip, complete), n: 36 (knee, incomplete), n: 8 (hip, incomplete); KOOS/HOOS QOL: n: 17 (knee, complete), n: 9 (hip, complete), n: 19 (knee, incomplete), n: 10 (hip, incomplete).

<sup>#</sup>Walking speed was assessed with the 40 m Fast-paces Walk Test under instruction of the GLA:D<sup>®</sup>-therapist

<sup>o</sup>Self-reported use of pain medication during last 3 months

<sup>!</sup>Self-reported sick leave for more than 1 month during last year due to knee/hip

<sup>%</sup>Number of comorbidities calculated from self-report of the following conditions: hypertension, cardiovascular diseases, lung diseases, diabetes, stomach diseases, liver- or kidney diseases, blood diseases, cancer, depression, rheumatoid arthritis, neurological disorders, other medical diseases

<sup>&</sup>Self-reported previous surgery in worst joint

<sup>\*</sup>Knee injury and Osteoarthritis Outcome Score or Hip disability or Osteoarthritis Outcome Score Quality Of Life sub-scale score

33 Table S2. Mean health care costs and home care costs one year prior to and one or three years following GLA:D® for knee and hip patients

|                                       | Pre-period<br>(1 year) | Post-period<br>(mth 1-3) |         | Post-period<br>(mth 4-12) |         | Post-period<br>(1 year) |         | Pre-period<br>(1 year) | Post-period<br>(year 1) |         | Post-period<br>(year 2) |         | Post-period<br>(year 3) |         |  |
|---------------------------------------|------------------------|--------------------------|---------|---------------------------|---------|-------------------------|---------|------------------------|-------------------------|---------|-------------------------|---------|-------------------------|---------|--|
|                                       | Cost<br>(€/month)      | Cost<br>(€/month)        | p-value | Cost<br>(€/month)         | p-value | Cost<br>(€/month)       | p-value | Cost<br>(€/Year)       | Cost<br>(€/year)        | p-value | Cost<br>(€/year)        | p-value | Cost<br>(€/year)        | p-value |  |
| <b>Knee (n: 12,162)</b>               |                        |                          |         |                           |         |                         |         | <b>Knee (n: 1,879)</b> |                         |         |                         |         |                         |         |  |
| <b>Health costs (somatic)</b>         |                        |                          |         |                           |         |                         |         |                        |                         |         |                         |         |                         |         |  |
| <b>Inpatient Admissions total</b>     | <b>73.1</b>            | <b>67.7</b>              | 0.999   | <b>170.6</b>              | 0.000   | <b>144.8</b>            | 0.000   | <b>962.1</b>           | <b>1,785.3</b>          | 0.000   | <b>2,086.1</b>          | 0.000   | <b>1,729.7</b>          | 0.000   |  |
| Thereof inpatient                     |                        |                          |         |                           |         |                         |         |                        |                         |         |                         |         |                         |         |  |
| Surgery knee/hip                      | 9.6                    | 17.9                     | 0.004   | 67.7                      | 0.000   | 55.2                    | 0.000   | 160.0                  | 618.4                   | 0.000   | 681.6                   | 0.000   | 428.7                   | 0.000   |  |
| Surgery other                         | 11.3                   | 4.9                      | 0.000   | 14.1                      | 0.596   | 11.8                    | 1.000   | 151.3                  | 225.5                   | 0.866   | 198.8                   | 0.995   | 290.1                   | 1.000   |  |
| <b>Outpatient Services total</b>      | <b>108.4</b>           | <b>90.3</b>              | 0.000   | <b>107.4</b>              | 1.000   | <b>103.1</b>            | 0.764   | <b>1,421.0</b>         | <b>1,345.1</b>          | 1.000   | <b>1,359.0</b>          | 1.000   | <b>1,372.1</b>          | 0.771   |  |
| Thereof outpatient                    |                        |                          |         |                           |         |                         |         |                        |                         |         |                         |         |                         |         |  |
| Surgery knee/hip                      | 4.3                    | 1.2                      | 0.000   | 1.7                       | 0.000   | 1.6                     | 0.000   | 74.9                   | 16.9                    | 0.000   | 10.0                    | 0.000   | 6.0                     | 0.000   |  |
| Surgery other                         | 1.9                    | 1.8                      | 1.000   | 1.8                       | 1.000   | 1.8                     | 1.000   | 23.4                   | 15.5                    | 0.998   | 24.4                    | 1.000   | 32.1                    | 1.000   |  |
| <b>Primary health sector total</b>    | <b>48.9</b>            | <b>75.5</b>              | 0.000   | <b>49.6</b>               | 0.963   | <b>56.1</b>             | 0.000   | <b>562.7</b>           | <b>669.7</b>            | 0.000   | <b>593.8</b>            | 0.614   | <b>581.8</b>            | 0.000   |  |
| Thereof primary                       |                        |                          |         |                           |         |                         |         |                        |                         |         |                         |         |                         |         |  |
| Physiotherapy                         | 5.2                    | 33.7                     | 0.000   | 7.7                       | 0.000   | 14.2                    | 0.000   | 66.2                   | 175.4                   | 0.000   | 68.5                    | 1.000   | 60.8                    | 0.000   |  |
| Chiropractic                          | 0.5                    | 0.5                      | 1.000   | 0.5                       | 0.768   | 0.5                     | 0.946   | 6.2                    | 6.9                     | 0.999   | 6.0                     | 1.000   | 5.7                     | 0.942   |  |
| General practitioner                  | 18.5                   | 16.7                     | 0.000   | 17.5                      | 0.000   | 17.3                    | 0.000   | 215.8                  | 206.4                   | 0.783   | 222.9                   | 0.977   | 221.1                   | 0.000   |  |
| Other primary                         | 24.7                   | 24.5                     | 1.000   | 23.9                      | 0.560   | 24.0                    | 0.816   | 274.6                  | 281.0                   | 1.000   | 296.3                   | 0.809   | 294.2                   | 0.818   |  |
| <b>Prescription medications total</b> | <b>28.8</b>            | <b>29.5</b>              | 0.998   | <b>29.9</b>               | 0.873   | <b>29.8</b>             | 0.943   | <b>314.5</b>           | <b>346.9</b>            | 0.782   | <b>367.7</b>            | 0.161   | <b>372.8</b>            | 0.938   |  |
| Thereof prescription                  |                        |                          |         |                           |         |                         |         |                        |                         |         |                         |         |                         |         |  |
| Painkiller medications                | 3.4                    | 3.6                      | 1.000   | 3.8                       | 0.985   | 3.7                     | 0.995   | 34.8                   | 38.4                    | 0.940   | 40.2                    | 0.616   | 39.3                    | 0.996   |  |
| Not painkiller medications            | 25.4                   | 25.9                     | 1.000   | 26.2                      | 0.982   | 26.1                    | 0.993   | 279.8                  | 308.5                   | 0.869   | 327.5                   | 0.252   | 333.5                   | 0.994   |  |
| <b>Health costs total (somatic)</b>   | <b>259.2</b>           | <b>263.0</b>             | 1.000   | <b>357.6</b>              | 0.000   | <b>333.8</b>            | 0.000   | <b>3,260.3</b>         | <b>4,147.0</b>          | 0.001   | <b>4,406.6</b>          | 0.000   | <b>4,056.4</b>          | 0.000   |  |
| <b>Home care</b>                      |                        |                          |         |                           |         |                         |         |                        |                         |         |                         |         |                         |         |  |
| <b>Home care total</b>                | <b>2.5</b>             | <b>3.2</b>               | 0.851   | <b>4.6</b>                | 0.001   | <b>4.2</b>              | 0.002   | <b>30.7</b>            | <b>60.1</b>             | 0.718   | <b>107.7</b>            | 0.016   | <b>203.3</b>            | 0.015   |  |
| Thereof home care                     |                        |                          |         |                           |         |                         |         |                        |                         |         |                         |         |                         |         |  |
| Home care – Care                      | 1.0                    | 1.6                      | 0.965   | 2.5                       | 0.008   | 2.2                     | 0.013   | 8.3                    | 29.8                    | 0.756   | 69.4                    | 0.019   | 151.7                   | 0.147   |  |
| Home care - Practical help            | 1.5                    | 1.7                      | 0.974   | 2.1                       | 0.078   | 2.0                     | 0.141   | 22.4                   | 30.3                    | 0.982   | 38.4                    | 0.390   | 51.7                    | 0.003   |  |
| <b>Hip (n: 4,093)</b>                 |                        |                          |         |                           |         |                         |         | <b>Hip (n: 658)</b>    |                         |         |                         |         |                         |         |  |
| <b>Health costs (somatic)</b>         |                        |                          |         |                           |         |                         |         |                        |                         |         |                         |         |                         |         |  |
| <b>Inpatient Admissions total</b>     | <b>79.8</b>            | <b>127.1</b>             | 0.000   | <b>274.4</b>              | 0.000   | <b>237.4</b>            | 0.000   | <b>1,099.4</b>         | <b>3,047.2</b>          | 0.000   | <b>2,699.7</b>          | 0.000   | <b>2,141.7</b>          | 0.000   |  |
| Thereof inpatient                     |                        |                          |         |                           |         |                         |         |                        |                         |         |                         |         |                         |         |  |
| Surgery knee/hip                      | 13.0                   | 77.2                     | 0.000   | 181.5                     | 0.000   | 155.3                   | 0.000   | 162.5                  | 1,901.2                 | 0.000   | 1,391.5                 | 0.000   | 901.2                   | 0.000   |  |
| Surgery other                         | 6.8                    | 2.7                      | 0.198   | 10.4                      | 0.732   | 8.4                     | 0.998   | 95.8                   | 122.7                   | 1.000   | 131.9                   | 1.000   | 137.1                   | 0.999   |  |
| <b>Outpatient Services total</b>      | <b>96.4</b>            | <b>87.0</b>              | 0.676   | <b>114.8</b>              | 0.040   | <b>107.8</b>            | 0.453   | <b>1,169.9</b>         | <b>1,259.9</b>          | 1.000   | <b>1,420.9</b>          | 0.947   | <b>1,478.7</b>          | 0.463   |  |
| Thereof outpatient                    |                        |                          |         |                           |         |                         |         |                        |                         |         |                         |         |                         |         |  |
| Surgery knee/hip                      | 0.3                    | 0.7                      | 0.999   | 0.9                       | 0.750   | 0.8                     | 0.661   | 6.8                    | 9.9                     | 1.000   | 0.0                     | 0.996   | 0.0                     | 0.673   |  |
| Surgery other                         | 1.7                    | 3.0                      | 0.855   | 2.2                       | 0.996   | 2.4                     | 0.874   | 28.2                   | 18.3                    | 1.000   | 17.1                    | 0.999   | 15.0                    | 1.000   |  |
| <b>Primary health sector total</b>    | <b>49.1</b>            | <b>79.9</b>              | 0.000   | <b>51.9</b>               | 0.000   | <b>58.9</b>             | 0.000   | <b>571.3</b>           | <b>701.2</b>            | 0.000   | <b>611.1</b>            | 0.934   | <b>594.4</b>            | 0.000   |  |
| Thereof primary                       |                        |                          |         |                           |         |                         |         |                        |                         |         |                         |         |                         |         |  |
| Physiotherapy                         | 6.4                    | 37.5                     | 0.000   | 8.8                       | 0.000   | 16.0                    | 0.000   | 89.6                   | 208.1                   | 0.000   | 91.3                    | 1.000   | 72.0                    | 0.000   |  |
| Chiropractic                          | 0.7                    | 0.5                      | 0.031   | 0.5                       | 0.001   | 0.5                     | 0.001   | 8.1                    | 7.2                     | 1.000   | 4.6                     | 0.034   | 6.4                     | 0.002   |  |
| General practitioner                  | 18.0                   | 16.9                     | 0.041   | 17.9                      | 1.000   | 17.7                    | 0.970   | 206.9                  | 205.7                   | 1.000   | 233.1                   | 0.759   | 218.7                   | 0.972   |  |
| Other primary                         | 23.9                   | 24.9                     | 0.983   | 24.7                      | 0.993   | 24.7                    | 0.986   | 266.6                  | 280.3                   | 1.000   | 292.1                   | 0.973   | 297.3                   | 0.988   |  |
| <b>Prescription medications total</b> | <b>28.7</b>            | <b>29.6</b>              | 1.000   | <b>30.3</b>               | 1.000   | <b>30.1</b>             | 0.977   | <b>316.9</b>           | <b>358.8</b>            | 0.989   | <b>335.2</b>            | 1.000   | <b>349.8</b>            | 0.980   |  |
| Thereof prescription                  |                        |                          |         |                           |         |                         |         |                        |                         |         |                         |         |                         |         |  |
| Painkiller medications                | 3.1                    | 4.1                      | 0.000   | 3.9                       | 0.000   | 4.0                     | 0.000   | 33.4                   | 44.6                    | 0.530   | 37.1                    | 1.000   | 35.8                    | 0.000   |  |
| Not painkiller medications            | 25.7                   | 25.6                     | 1.000   | 26.3                      | 1.000   | 26.1                    | 1.000   | 283.5                  | 314.2                   | 1.000   | 298.1                   | 1.000   | 314.0                   | 1.000   |  |
| <b>Health costs total (somatic)</b>   | <b>254.1</b>           | <b>323.6</b>             | 0.000   | <b>471.5</b>              | 0.000   | <b>434.2</b>            | 0.000   | <b>3,157.5</b>         | <b>5,367.0</b>          | 0.000   | <b>5,066.9</b>          | 0.000   | <b>4,564.6</b>          | 0.000   |  |
| <b>Home care</b>                      |                        |                          |         |                           |         |                         |         |                        |                         |         |                         |         |                         |         |  |
| <b>Home care total</b>                | <b>3.4</b>             | <b>4.0</b>               | 1.000   | <b>4.9</b>                | 0.977   | <b>4.7</b>              | 0.994   | <b>78.3</b>            | <b>108.9</b>            | 1.000   | <b>189.1</b>            | 1.000   | <b>265.0</b>            | 0.994   |  |
| Thereof home care                     |                        |                          |         |                           |         |                         |         |                        |                         |         |                         |         |                         |         |  |
| Home care – Care                      | 1.8                    | 2.1                      | 1.000   | 2.7                       | 0.999   | 2.6                     | 1.000   | 53.1                   | 79.5                    | 1.000   | 152.3                   | 0.995   | 218.6                   | 1.000   |  |
| Home care - Practical help            | 1.6                    | 1.9                      | 1.000   | 2.2                       | 0.710   | 2.1                     | 0.869   | 25.2                   | 29.3                    | 1.000   | 36.8                    | 0.999   | 46.4                    | 0.994   |  |

34 Table S3. Predicted health care costs and home care costs one year prior to and one or three years following GLA:D® for knee and hip patients

|                                       | One-year horizon    |                |                       |                |                        |                |                     | Three-year horizon |                     |              |                      |         |                      |         |                      |         |
|---------------------------------------|---------------------|----------------|-----------------------|----------------|------------------------|----------------|---------------------|--------------------|---------------------|--------------|----------------------|---------|----------------------|---------|----------------------|---------|
|                                       | Pre-period (1 year) |                | Post-period (mth 1-3) |                | Post-period (mth 4-12) |                | Post-period (year1) |                    | Pre-period (1 year) |              | Post-period (year 1) |         | Post-period (year 2) |         | Post-period (year 3) |         |
|                                       | Cost (€/month)      | Cost (€/month) | p-value               | Cost (€/month) | p-value                | Cost (€/month) | p-value             | Cost (€/Year)      | Cost (€/Year)       | p-value      | Cost (€/year)        | p-value | Cost (€/year)        | p-value | Cost (€/year)        | p-value |
|                                       | Knee <sup>#</sup>   |                |                       |                |                        |                |                     | Knee <sup>§</sup>  |                     |              |                      |         |                      |         |                      |         |
| <b>Health costs (somatic)</b>         |                     |                |                       |                |                        |                |                     |                    |                     |              |                      |         |                      |         |                      |         |
| <b>Inpatient Admissions total</b>     | <b>70.2</b>         | <b>61.6</b>    | 0.097                 | <b>159.9</b>   | 0.000                  | <b>135.2</b>   | 0.000               | <b>935.1</b>       | <b>1,657.4</b>      | 0.000        | <b>2,105.4</b>       | 0.000   | <b>1,671.9</b>       | 0.000   |                      |         |
| Thereof inpatient                     |                     |                |                       |                |                        |                |                     |                    |                     |              |                      |         |                      |         |                      |         |
| Surgery knee/hip                      | 9.1                 | 17.5           | 0.000                 | 68.2           | 0.000                  | 55.5           | 0.000               | 176.2              | 610.9               | 0.000        | 739.9                | 0.000   | 456.0                | 0.000   |                      |         |
| Surgery other                         | 8.9                 | 3.9            | 0.002                 | 10.1           | 0.340                  | 8.5            | 0.767               | 112.1              | 152.2               | 0.318        | 153.9                | 0.294   | 211.4                | 0.052   |                      |         |
| <b>Outpatient Services total</b>      | <b>105.7</b>        | <b>86.7</b>    | 0.000                 | <b>103.0</b>   | 0.328                  | <b>98.9</b>    | 0.006               | <b>1,415.7</b>     | <b>1,307.8</b>      | 0.273        | <b>1,337.8</b>       | 0.486   | <b>1,352.6</b>       | 0.515   |                      |         |
| Thereof outpatient                    |                     |                |                       |                |                        |                |                     |                    |                     |              |                      |         |                      |         |                      |         |
| Surgery knee/hip                      | 0.7                 | 0.2            | 0.000                 | 0.3            | 0.000                  | 0.3            | 0.000               | 80.6               | 17.8                | -            | 7.4                  | -       | 6.7                  | -       |                      |         |
| Surgery other                         | 1.7                 | 1.5            | 0.692                 | 1.4            | 0.370                  | 1.5            | 0.376               | 25.4               | 18.8                | 0.453        | 28.8                 | 0.736   | 38.0                 | 0.291   |                      |         |
| <b>Primary health sector total</b>    | <b>59.4</b>         | <b>92.4</b>    | 0.000                 | <b>60.3</b>    | 0.041                  | <b>68.3</b>    | 0.000               | <b>608.8</b>       | <b>720.2</b>        | 0.000        | <b>632.4</b>         | 0.031   | <b>621.8</b>         | 0.275   |                      |         |
| Thereof primary                       |                     |                |                       |                |                        |                |                     |                    |                     |              |                      |         |                      |         |                      |         |
| Physiotherapy                         | 6.5                 | 42.5           | 0.000                 | 9.5            | 0.000                  | 17.7           | 0.000               | 70.0               | 190.5               | 0.000        | 71.8                 | 0.584   | 64.3                 | 0.103   |                      |         |
| Chiropractic                          | 0.5                 | 0.5            | 0.144                 | 0.5            | 0.004                  | 0.5            | 0.003               | 5.7                | 6.3                 | 0.221        | 5.6                  | 0.870   | 5.1                  | 0.264   |                      |         |
| General practitioner                  | 18.3                | 16.5           | 0.000                 | 17.3           | 0.000                  | 17.1           | 0.000               | 235.4              | 223.5               | 0.002        | 240.2                | 0.256   | 238.6                | 0.468   |                      |         |
| Other primary                         | 33.7                | 33.8           | 0.874                 | 32.8           | 0.029                  | 33.1           | 0.082               | 297.9              | 298.9               | 0.904        | 314.6                | 0.066   | 313.6                | 0.118   |                      |         |
| <b>Prescription medications total</b> | <b>29.5</b>         | <b>30.4</b>    | 0.008                 | <b>30.6</b>    | 0.000                  | <b>30.6</b>    | 0.000               | <b>363.0</b>       | <b>396.8</b>        | 0.000        | <b>415.2</b>         | 0.000   | <b>419.3</b>         | 0.000   |                      |         |
| Thereof prescription                  |                     |                |                       |                |                        |                |                     |                    |                     |              |                      |         |                      |         |                      |         |
| Painkiller medications                | 3.5                 | 3.8            | 0.000                 | 3.9            | 0.000                  | 3.9            | 0.000               | 43.2               | 47.9                | 0.001        | 49.8                 | 0.001   | 49.2                 | 0.004   |                      |         |
| Not painkiller medications            | 25.8                | 26.3           | 0.061                 | 26.5           | 0.003                  | 26.4           | 0.003               | 318.8              | 348.1               | 0.000        | 364.3                | 0.000   | 368.6                | 0.000   |                      |         |
| <b>Health costs total (somatic)</b>   | <b>263.3</b>        | <b>263.7</b>   | 0.952                 | <b>354.0</b>   | 0.000                  | <b>331.3</b>   | 0.000               | <b>3,391.7</b>     | <b>4,146.2</b>      | 0.000        | <b>4,518.3</b>       | 0.000   | <b>4,127.5</b>       | 0.000   |                      |         |
| <b>Home care</b>                      |                     |                |                       |                |                        |                |                     |                    |                     |              |                      |         |                      |         |                      |         |
| <b>Home care total</b>                | <b>2.7</b>          | <b>3.6</b>     | 0.029                 | <b>5.0</b>     | 0.001                  | <b>4.6</b>     | 0.001               | <b>35.5</b>        | <b>77.2</b>         | <b>0.011</b> | <b>131.1</b>         | 0.000   | <b>214.6</b>         | 0.000   |                      |         |
| Thereof home care                     |                     |                |                       |                |                        |                |                     |                    |                     |              |                      |         |                      |         |                      |         |
| Home care – Care                      | 0.9                 | 1.4            | 0.004                 | 2.1            | 0.082                  | 2.0            | 0.153               | 8.5                | 41.1                | 0.014        | 90.2                 | 0.000   | 149.0                | 0.000   |                      |         |
| Home care - Practical help            | 1.8                 | 2.2            | 0.029                 | 2.8            | 0.000                  | 2.6            | 0.000               | 28.1               | 44.5                | 0.052        | 53.0                 | 0.001   | 68.1                 | 0.000   |                      |         |
|                                       | Hip <sup>#</sup>    |                |                       |                |                        |                |                     | Hip <sup>§</sup>   |                     |              |                      |         |                      |         |                      |         |
| <b>Health costs (somatic)</b>         |                     |                |                       |                |                        |                |                     |                    |                     |              |                      |         |                      |         |                      |         |
| <b>Inpatient Admissions total</b>     | <b>71.7</b>         | <b>111.3</b>   | 0.000                 | <b>243.2</b>   | 0.000                  | <b>208.9</b>   | 0.000               | <b>978.4</b>       | <b>2,818.4</b>      | 0.000        | <b>2,461.1</b>       | 0.000   | <b>1,966.0</b>       | 0.006   |                      |         |
| Thereof inpatient                     |                     |                |                       |                |                        |                |                     |                    |                     |              |                      |         |                      |         |                      |         |
| Surgery knee/hip                      | 11.6                | 67.0           | 0.000                 | 167.5          | 0.000                  | 142.3          | 0.000               | 138.1              | 1,734.6             | 0.000        | 1,294.2              | 0.000   | 788.5                | 0.000   |                      |         |
| Surgery other                         | 6.9                 | 1.3            | 0.001                 | 11.8           | 0.086                  | 9.2            | 0.353               | 89.2               | 145.3               | 0.342        | 129.6                | 0.465   | 139.2                | 0.370   |                      |         |
| <b>Outpatient Services total</b>      | <b>77.1</b>         | <b>68.9</b>    | 0.006                 | <b>91.2</b>    | 0.000                  | <b>85.4</b>    | 0.012               | <b>1,174.6</b>     | <b>1,270.1</b>      | 0.401        | <b>1,441.3</b>       | 0.074   | <b>1,513.5</b>       | 0.038   |                      |         |
| Thereof outpatient                    |                     |                |                       |                |                        |                |                     |                    |                     |              |                      |         |                      |         |                      |         |
| Surgery knee/hip*                     | 0.0                 | 0.0            | 0.238                 | 0.2            | 0.000                  | 0.1            | 0.000               | -                  | -                   | -            | -                    | -       | -                    | -       |                      |         |
| Surgery other                         | 0.4                 | 0.3            | 0.799                 | 0.4            | 0.927                  | 0.4            | 0.881               | 37.7               | 29.6                | 0.643        | 24.5                 | 0.383   | 22.1                 | 0.395   |                      |         |
| <b>Primary health sector total</b>    | <b>58.7</b>         | <b>96.3</b>    | 0.000                 | <b>62.4</b>    | 0.000                  | <b>70.9</b>    | 0.000               | <b>584.9</b>       | <b>719.9</b>        | 0.000        | <b>625.2</b>         | 0.021   | <b>608.4</b>         | 0.231   |                      |         |
| Thereof primary                       |                     |                |                       |                |                        |                |                     |                    |                     |              |                      |         |                      |         |                      |         |
| Physiotherapy                         | 8.1                 | 47.7           | 0.000                 | 11.0           | 0.000                  | 20.2           | 0.000               | 94.5               | 221.7               | 0.000        | 96.4                 | 0.805   | 74.8                 | 0.003   |                      |         |
| Chiropractic                          | 0.5                 | 0.4            | 0.000                 | 0.4            | 0.000                  | 0.4            | 0.000               | 8.9                | 7.3                 | 0.143        | 4.9                  | 0.000   | 6.6                  | 0.144   |                      |         |
| General practitioner                  | 17.3                | 16.3           | 0.000                 | 17.2           | 0.346                  | 16.9           | 0.019               | 214.1              | 212.0               | 0.728        | 228.4                | 0.020   | 224.9                | 0.120   |                      |         |
| Other primary                         | 32.4                | 33.9           | 0.120                 | 34.0           | 0.038                  | 33.9           | 0.029               | 269.0              | 283.3               | 0.386        | 294.0                | 0.098   | 300.4                | 0.056   |                      |         |
| <b>Prescription medications total</b> | <b>28.3</b>         | <b>28.9</b>    | 0.333                 | <b>29.6</b>    | 0.005                  | <b>29.4</b>    | 0.023               | <b>337.5</b>       | <b>381.9</b>        | 0.016        | <b>350.5</b>         | 0.642   | <b>368.7</b>         | 0.298   |                      |         |
| Thereof prescription                  |                     |                |                       |                |                        |                |                     |                    |                     |              |                      |         |                      |         |                      |         |
| Painkiller medications                | 2.9                 | 3.8            | 0.000                 | 3.7            | 0.000                  | 3.7            | 0.000               | 38.0               | 49.2                | 0.000        | 41.8                 | 0.189   | 41.5                 | 0.327   |                      |         |
| Not painkiller medications            | 25.2                | 24.8           | 0.452                 | 25.7           | 0.330                  | 25.4           | 0.747               | 298.0              | 332.1               | 0.058        | 306.2                | 0.766   | 324.5                | 0.365   |                      |         |
| <b>Health costs total (somatic)</b>   | <b>234.5</b>        | <b>297.6</b>   | 0.000                 | <b>433.0</b>   | 0.000                  | <b>397.3</b>   | 0.000               | <b>3,051.0</b>     | <b>5,207.7</b>      | 0.000        | <b>4,902.1</b>       | 0.000   | <b>4,473.4</b>       | 0.001   |                      |         |
| <b>Home care</b>                      |                     |                |                       |                |                        |                |                     |                    |                     |              |                      |         |                      |         |                      |         |
| <b>Home care total</b>                | <b>1.1</b>          | <b>1.7</b>     | 0.255                 | <b>1.9</b>     | 0.009                  | <b>1.9</b>     | 0.009               | <b>82.4</b>        | <b>111.4</b>        | 0.012        | <b>214.5</b>         | 0.000   | <b>406.0</b>         | 0.041   |                      |         |
| Thereof home care                     |                     |                |                       |                |                        |                |                     |                    |                     |              |                      |         |                      |         |                      |         |
| Home care – Care                      | 0.3                 | 0.3            | 0.881                 | 0.4            | 0.195                  | 0.4            | 0.264               | 55.1               | 79.1                | 0.099        | 173.3                | 0.062   | 356.3                | 0.064   |                      |         |



|   |                            |                                                                                                                                                                                                                 |     |       |     |       |     |       |      |      |       |      |       |      |       |
|---|----------------------------|-----------------------------------------------------------------------------------------------------------------------------------------------------------------------------------------------------------------|-----|-------|-----|-------|-----|-------|------|------|-------|------|-------|------|-------|
| 1 | Home care - Practical help | 1.1                                                                                                                                                                                                             | 1.4 | 0.067 | 1.7 | 0.010 | 1.7 | 0.008 | 28.7 | 33.1 | 0.001 | 46.1 | 0.000 | 61.0 | 0.012 |
| 2 | 35                         | #Predicted health care costs and costs for home care in one-year horizon for women, 65 years, married/co-living, Danish ethnicity, low education and living in the Capital Region estimated using a generalized |     |       |     |       |     |       |      |      |       |      |       |      |       |
| 3 | 36                         | estimating equation gamma regression model for repeated measures including sex, age, marital status, ethnicity, education and region as covariates. Because of no convergence in the model material status and  |     |       |     |       |     |       |      |      |       |      |       |      |       |
| 4 | 37                         | ethnicity were omitted estimating costs for home care.                                                                                                                                                          |     |       |     |       |     |       |      |      |       |      |       |      |       |
| 5 | 38                         | §Predicted health care costs and costs for home care in three-year horizon for women, 65 years, married/co-living and low education estimated using a generalized estimating equation gamma regression model    |     |       |     |       |     |       |      |      |       |      |       |      |       |
| 6 | 39                         | for repeated measures including sex, age and education. Because of no convergence in the model age and education were omitted estimating costs for home care.                                                   |     |       |     |       |     |       |      |      |       |      |       |      |       |
| 7 | 40                         | &Surgery is not predicted in a three-year horizon because of no convergence of the model.                                                                                                                       |     |       |     |       |     |       |      |      |       |      |       |      |       |
| 8 | 41                         |                                                                                                                                                                                                                 |     |       |     |       |     |       |      |      |       |      |       |      |       |

For peer review only

42 **Table S4. Mean public transfer payments one year prior to and one or three years following GLA:D® for knee and hip patients**

|                                 | One-year horizon                             |             |                       |             |                        |             |                      |             | Three-year horizon                         |            |                      |         |                      |         |                      |         |
|---------------------------------|----------------------------------------------|-------------|-----------------------|-------------|------------------------|-------------|----------------------|-------------|--------------------------------------------|------------|----------------------|---------|----------------------|---------|----------------------|---------|
|                                 | Pre-period (1 year)                          |             | Post-period (mth 1-3) |             | Post-period (mth 4-12) |             | Post-period (1 year) |             | Pre-period (1 year)                        |            | Post-period (year 1) |         | Post-period (year 2) |         | Post-period (year 3) |         |
|                                 | Weeks/month                                  | Weeks/month | p-value               | Weeks/month | p-value                | Weeks/month | p-value              | Weeks/month | p-value                                    | Weeks/year | Weeks/year           | p-value | Weeks/year           | p-value | Weeks/year           | p-value |
|                                 | <b>Knee patients in workforce (n: 5,586)</b> |             |                       |             |                        |             |                      |             | <b>Knee patients in workforce (n: 905)</b> |            |                      |         |                      |         |                      |         |
| <b>Public transfer payments</b> |                                              |             |                       |             |                        |             |                      |             |                                            |            |                      |         |                      |         |                      |         |
| Unemployed                      | 0.26                                         | 0.29        | 0.465                 | 0.30        | 0.104                  | 0.29        | 0.148                | 2.93        | 3.23                                       | 0.996      | 3.03                 | 1.000   | 2.91                 | 1.000   |                      |         |
| Sheltered employment            | 0.17                                         | 0.16        | 1.000                 | 0.16        | 1.000                  | 0.16        | 1.000                | 1.48        | 1.52                                       | 1.000      | 1.61                 | 1.000   | 1.68                 | 0.999   |                      |         |
| Sick pay                        | 0.14                                         | 0.19        | 0.000                 | 0.16        | 0.807                  | 0.17        | 0.159                | 1.55        | 1.88                                       | 0.830      | 1.64                 | 1.000   | 1.24                 | 0.798   |                      |         |
| Rehabilitation                  | 0.01                                         | 0.01        | 0.998                 | 0.01        | 1.000                  | 0.01        | 0.999                | 0.09        | 0.03                                       | 0.964      | 0.09                 | 1.000   | 0.06                 | 1.000   |                      |         |
| Education                       | 0.01                                         | 0.01        | 1.000                 | 0.01        | 1.000                  | 0.01        | 1.000                | 0.20        | 0.18                                       | 1.000      | 0.23                 | 1.000   | 0.20                 | 1.000   |                      |         |
| Disability pension              | 0.29                                         | 0.30        | 1.000                 | 0.29        | 1.000                  | 0.30        | 1.000                | 3.51        | 3.53                                       | 1.000      | 3.20                 | 0.000   | 2.93                 | 0.939   |                      |         |
| Early retirement                | 0.37                                         | 0.46        | 0.001                 | 0.46        | 0.002                  | 0.46        | 0.001                | 5.58        | 6.73                                       | 0.598      | 6.36                 | 0.907   | 4.89                 | 0.935   |                      |         |
|                                 | <b>Hip patients in workforce (n: 1,543)</b>  |             |                       |             |                        |             |                      |             | <b>Hip patients in workforce (n: 264)</b>  |            |                      |         |                      |         |                      |         |
| <b>Public transfer payments</b> |                                              |             |                       |             |                        |             |                      |             |                                            |            |                      |         |                      |         |                      |         |
| Unemployed                      | 0.22                                         | 0.23        | 1.000                 | 0.24        | 0.998                  | 0.23        | 0.999                | 2.28        | 2.57                                       | 1.000      | 2.30                 | 1.000   | 1.80                 | 0.995   |                      |         |
| Sheltered employment            | 0.16                                         | 0.16        | 1.000                 | 0.16        | 1.000                  | 0.16        | 1.000                | 1.72        | 1.72                                       | 1.000      | 1.50                 | 1.000   | 1.78                 | 1.000   |                      |         |
| Sick pay                        | 0.10                                         | 0.14        | 0.202                 | 0.16        | 0.006                  | 0.15        | 0.009                | 1.35        | 1.85                                       | 0.963      | 1.72                 | 0.992   | 1.48                 | 1.000   |                      |         |
| Rehabilitation                  | 0.00                                         | 0.01        | 0.996                 | 0.00        | 1.000                  | 0.00        | 1.000                | 0.04        | 0.06                                       | 1.000      | 0.19                 | 0.986   | 0.41                 | 0.622   |                      |         |
| Education                       | 0.01                                         | 0.01        | 1.000                 | 0.01        | 1.000                  | 0.01        | 1.000                | 0.27        | 0.20                                       | 1.000      | 0.20                 | 1.000   | 0.12                 | 0.997   |                      |         |
| Disability pension              | 0.37                                         | 0.37        | 1.000                 | 0.37        | 1.000                  | 0.37        | 1.000                | 4.34        | 4.45                                       | 1.000      | 3.98                 | 1.000   | 3.47                 | 0.991   |                      |         |
| Early retirement                | 0.45                                         | 0.56        | 0.128                 | 0.56        | 0.129                  | 0.56        | 0.126                | 7.73        | 9.78                                       | 0.810      | 8.59                 | 0.999   | 6.08                 | 0.876   |                      |         |

43

Review only

44 **Table S5. Sensitivity analysis - adjusted estimated health care cost per QALY from baseline to 12**  
 45 **months for knee and hip patients attending GLA:D® in private clinics, municipal clinics and patients**  
 46 **with complete information**

|                                     | Knee                                      |                                  |                          | Hip                                       |                                  |                           |
|-------------------------------------|-------------------------------------------|----------------------------------|--------------------------|-------------------------------------------|----------------------------------|---------------------------|
|                                     | Change in health care costs (€) (95 % CI) | Change in EQ-5D (QALY) (95 % CI) | Euro pr. QALY (95 % CI)  | Change in health care costs (€) (95 % CI) | Change in EQ-5D (QALY) (95 % CI) | Euro pr. QALY (95 % CI)   |
| <b>Private clinic<sup>§</sup></b>   | 267<br>(181-385)                          | 0.036<br>(0.033-0.038)           | 7,464<br>(5,485-10,132)  | 651<br>(398-1,050)                        | 0.028<br>(0.024-0.033)           | 22,914<br>(16,583-31,818) |
| <b>Municipal clinic<sup>#</sup></b> | 396<br>(118-949)                          | 0.032<br>(0.026-0.039)           | 12,292<br>(4,538-24,333) | 443<br>(69-2,056)                         | 0.028<br>(0.017-0.043)           | 15,550<br>(4,059-47,814)  |
| <b>Complete cases<sup>‡</sup></b>   | 167<br>(74-310)                           | 0.035<br>(0.032-0.037)           | 4,829<br>(2,313-8,378)   | 579<br>(284-1,142)                        | 0.027<br>(0.023-0.032)           | 21,067<br>(12,348-35,388) |

47  
 48 All analyses are adjusted for age, gender, marital status, ethnicity, educational level and region

49 <sup>§</sup>Analysis restricted to patients attending GLA:D® in a private clinic

50 <sup>#</sup>Analysis restricted to patients attending GLA:D® in a private clinic

51 <sup>‡</sup>Analysis restricted to patients with complete information on EQ-5D

# CHEERS Checklist

CHEERS checklist—Items to include when reporting economic evaluations of health interventions

| Section/item                    | Item No | Recommendation                                                                                                                                                                          | Reported on page No/ line No |
|---------------------------------|---------|-----------------------------------------------------------------------------------------------------------------------------------------------------------------------------------------|------------------------------|
| <b>Title and abstract</b>       |         |                                                                                                                                                                                         |                              |
| Title                           | 1       | Identify the study as an economic evaluation or use more specific terms such as “cost-effectiveness analysis”, and describe the interventions compared.                                 | Title, page 1                |
| Abstract                        | 2       | Provide a structured summary of objectives, perspective, setting, methods (including study design and inputs), results (including base case and uncertainty analyses), and conclusions. | Abstract, page 2             |
| <b>Introduction</b>             |         |                                                                                                                                                                                         |                              |
| Background and objectives       | 3       | Provide an explicit statement of the broader context for the study.                                                                                                                     | Line 75-81                   |
|                                 |         | Present the study question and its relevance for health policy or practice decisions.                                                                                                   | Line 88-91                   |
| <b>Methods</b>                  |         |                                                                                                                                                                                         |                              |
| Target population and subgroups | 4       | Describe characteristics of the base case population and subgroups analysed, including why they were chosen.                                                                            | Line 125 –142                |
| Setting and location            | 5       | State relevant aspects of the system(s) in which the decision(s) need(s) to be made.                                                                                                    | Line 110-117                 |
| Study perspective               | 6       | Describe the perspective of the study and relate this to the costs being evaluated.                                                                                                     | Line 97-102                  |
| Comparators                     | 7       | Describe the interventions or strategies being compared and state why they were chosen.                                                                                                 | Line 97-102                  |

| Section/item                                           | Item No | Recommendation                                                                                                                                                                                                                                                                                                              | Reported on page No/ line No |
|--------------------------------------------------------|---------|-----------------------------------------------------------------------------------------------------------------------------------------------------------------------------------------------------------------------------------------------------------------------------------------------------------------------------|------------------------------|
| Time horizon                                           | 8       | State the time horizon(s) over which costs and consequences are being evaluated and say why appropriate.                                                                                                                                                                                                                    | Line 97-102                  |
| Discount rate                                          | 9       | Report the choice of discount rate(s) used for costs and outcomes and say why appropriate.                                                                                                                                                                                                                                  | N/A                          |
| Choice of health outcomes                              | 10      | Describe what outcomes were used as the measure(s) of benefit in the evaluation and their relevance for the type of analysis performed.                                                                                                                                                                                     | Line 97-102;                 |
| Measurement of effectiveness                           | 11a     | <i>Single study-based estimates:</i> Describe fully the design features of the single effectiveness study and why the single study was a sufficient source of clinical effectiveness data.                                                                                                                                  | Line 183-188                 |
|                                                        | 11b     | <i>Synthesis-based estimates:</i> Describe fully the methods used for identification of included studies and synthesis of clinical effectiveness data.                                                                                                                                                                      | -                            |
| Measurement and valuation of preference based outcomes | 12      | If applicable, describe the population and methods used to elicit preferences for outcomes.                                                                                                                                                                                                                                 | N/A                          |
| Estimating resources and costs                         | 13a     | <i>Single study-based economic evaluation:</i> Describe approaches used to estimate resource use associated with the alternative interventions. Describe primary or secondary research methods for valuing each resource item in terms of its unit cost. Describe any adjustments made to approximate to opportunity costs. | Line 146-181                 |
|                                                        | 13b     | <i>Model-based economic evaluation:</i> Describe approaches and data sources used to estimate resource use associated with model health states. Describe primary or secondary research methods for                                                                                                                          | -                            |

| Section/item                         | Item No | Recommendation                                                                                                                                                                                                                                                                                                                                        | Reported on page No/ line No |
|--------------------------------------|---------|-------------------------------------------------------------------------------------------------------------------------------------------------------------------------------------------------------------------------------------------------------------------------------------------------------------------------------------------------------|------------------------------|
|                                      |         | valuing each resource item in terms of its unit cost. Describe any adjustments made to approximate to opportunity costs.                                                                                                                                                                                                                              |                              |
| Currency, price date, and conversion | 14      | Report the dates of the estimated resource quantities and unit costs. Describe methods for adjusting estimated unit costs to the year of reported costs if necessary. Describe methods for converting costs into a common currency base and the exchange rate.                                                                                        | Line 154-158                 |
| Choice of model                      | 15      | Describe and give reasons for the specific type of decision-analytical model used. Providing a figure to show model structure is strongly recommended.                                                                                                                                                                                                | N/A                          |
| Assumptions                          | 16      | Describe all structural or other assumptions underpinning the decision-analytical model.                                                                                                                                                                                                                                                              | N/A                          |
| Analytical methods                   | 17      | Describe all analytical methods supporting the evaluation. This could include methods for dealing with skewed, missing, or censored data; extrapolation methods; methods for pooling data; approaches to validate or make adjustments (such as half cycle corrections) to a model; and methods for handling population heterogeneity and uncertainty. | Line 210-219; Line 229-235   |
| <b>Results</b>                       |         |                                                                                                                                                                                                                                                                                                                                                       |                              |
| Study parameters                     | 18      | Report the values, ranges, references, and, if used, probability distributions for all parameters. Report reasons or sources for distributions used to represent uncertainty where appropriate. Providing a table to show the input values is strongly recommended.                                                                                   | Line 146-181                 |

| Section/item                                                         | Item No | Recommendation                                                                                                                                                                                                                                                              | Reported on page No/ line No                   |
|----------------------------------------------------------------------|---------|-----------------------------------------------------------------------------------------------------------------------------------------------------------------------------------------------------------------------------------------------------------------------------|------------------------------------------------|
| Incremental costs and outcomes                                       | 19      | For each intervention, report mean values for the main categories of estimated costs and outcomes of interest, as well as mean differences between the comparator groups. If applicable, report incremental cost-effectiveness ratios.                                      | Table 3; Table 4; Figure 2; Table S2; Table S3 |
| Characterising uncertainty                                           | 20a     | <i>Single study-based economic evaluation:</i> Describe the effects of sampling uncertainty for the estimated incremental cost and incremental effectiveness parameters, together with the impact of methodological assumptions (such as discount rate, study perspective). | N/A                                            |
|                                                                      | 20b     | <i>Model-based economic evaluation:</i> Describe the effects on the results of uncertainty for all input parameters, and uncertainty related to the structure of the model and assumptions.                                                                                 | -                                              |
| Characterising heterogeneity                                         | 21      | If applicable, report differences in costs, outcomes, or cost-effectiveness that can be explained by variations between subgroups of patients with different baseline characteristics or other observed variability in effects that are not reducible by more information.  | Line 237-241                                   |
| <b>Discussion</b>                                                    |         |                                                                                                                                                                                                                                                                             |                                                |
| Study findings, limitations, generalisability, and current knowledge | 22      | Summarise key study findings and describe how they support the conclusions reached. Discuss limitations and the generalisability of the findings and how the findings fit with current knowledge.                                                                           | Discussion                                     |
| <b>Other</b>                                                         |         |                                                                                                                                                                                                                                                                             |                                                |
| Source of funding                                                    | 23      | Describe how the study was funded and the role of the funder in the identification, design, conduct, and                                                                                                                                                                    | Line 455-456                                   |

| Section/item          | Item No | Recommendation                                                                                                                                                                                                                                    | Reported on page No/ line No |
|-----------------------|---------|---------------------------------------------------------------------------------------------------------------------------------------------------------------------------------------------------------------------------------------------------|------------------------------|
|                       |         | reporting of the analysis. Describe other non-monetary sources of support.                                                                                                                                                                        |                              |
| Conflicts of interest | 24      | Describe any potential for conflict of interest of study contributors in accordance with journal policy. In the absence of a journal policy, we recommend authors comply with International Committee of Medical Journal Editors recommendations. | Line 469-483                 |

For consistency, the CHEERS statement checklist format is based on the format of the CONSORT statement checklist



# BMJ Open

**COST-EFFECTIVENESS OF AN 8-WEEK SUPERVISED EDUCATION AND EXERCISE THERAPY PROGRAM FOR KNEE AND HIP OSTEOARTHRITIS: A PRE-POST ANALYSIS OF 16,255 PATIENTS PARTICIPATING IN GOOD LIFE WITH OSTEOARTHRITIS IN DENMARK (GLA:D®)**

|                                 |                                                                                                                                                                                                                                                                                                                                                                                                                                                                                                                                        |
|---------------------------------|----------------------------------------------------------------------------------------------------------------------------------------------------------------------------------------------------------------------------------------------------------------------------------------------------------------------------------------------------------------------------------------------------------------------------------------------------------------------------------------------------------------------------------------|
| Journal:                        | <i>BMJ Open</i>                                                                                                                                                                                                                                                                                                                                                                                                                                                                                                                        |
| Manuscript ID                   | bmjopen-2021-049541.R1                                                                                                                                                                                                                                                                                                                                                                                                                                                                                                                 |
| Article Type:                   | Original research                                                                                                                                                                                                                                                                                                                                                                                                                                                                                                                      |
| Date Submitted by the Author:   | 22-Sep-2021                                                                                                                                                                                                                                                                                                                                                                                                                                                                                                                            |
| Complete List of Authors:       | Grønne, Dorte; University of Southern Denmark, Department of Sports Science and Clinical Biomechanics<br>Roos, Ewa; University of Southern Denmark, Department of Sports Science and Clinical Biomechanics<br>Ibsen, Rikke; I2minds<br>Kjellberg, Jakob; VIVE - The Danish Center for Social Science Research<br>Skou, Søren; University of Southern Denmark, Department of Sports Science and Clinical Biomechanics; Occupational Therapy Næstved-Slagelse-Ringsted Hospitals, Department of Sports Science and Clinical Biomechanics |
| <b>Primary Subject Heading</b>: | Health economics                                                                                                                                                                                                                                                                                                                                                                                                                                                                                                                       |
| Secondary Subject Heading:      | Sports and exercise medicine                                                                                                                                                                                                                                                                                                                                                                                                                                                                                                           |
| Keywords:                       | Knee < ORTHOPAEDIC & TRAUMA SURGERY, Hip < ORTHOPAEDIC & TRAUMA SURGERY, SPORTS MEDICINE, Musculoskeletal disorders < ORTHOPAEDIC & TRAUMA SURGERY, HEALTH ECONOMICS                                                                                                                                                                                                                                                                                                                                                                   |
|                                 |                                                                                                                                                                                                                                                                                                                                                                                                                                                                                                                                        |

SCHOLARONE™  
Manuscripts



I, the Submitting Author has the right to grant and does grant on behalf of all authors of the Work (as defined in the below author licence), an exclusive licence and/or a non-exclusive licence for contributions from authors who are: i) UK Crown employees; ii) where BMJ has agreed a CC-BY licence shall apply, and/or iii) in accordance with the terms applicable for US Federal Government officers or employees acting as part of their official duties; on a worldwide, perpetual, irrevocable, royalty-free basis to BMJ Publishing Group Ltd ("BMJ") its licensees and where the relevant Journal is co-owned by BMJ to the co-owners of the Journal, to publish the Work in this journal and any other BMJ products and to exploit all rights, as set out in our [licence](#).

The Submitting Author accepts and understands that any supply made under these terms is made by BMJ to the Submitting Author unless you are acting as an employee on behalf of your employer or a postgraduate student of an affiliated institution which is paying any applicable article publishing charge ("APC") for Open Access articles. Where the Submitting Author wishes to make the Work available on an Open Access basis (and intends to pay the relevant APC), the terms of reuse of such Open Access shall be governed by a Creative Commons licence – details of these licences and which [Creative Commons](#) licence will apply to this Work are set out in our licence referred to above.

Other than as permitted in any relevant BMJ Author's Self Archiving Policies, I confirm this Work has not been accepted for publication elsewhere, is not being considered for publication elsewhere and does not duplicate material already published. I confirm all authors consent to publication of this Work and authorise the granting of this licence.

1  
2  
3  
4 1 **COST-EFFECTIVENESS OF AN 8-WEEK SUPERVISED EDUCATION AND**  
5  
6  
7 2 **EXERCISE THERAPY PROGRAM FOR KNEE AND HIP**  
8  
9  
10 3 **OSTEOARTHRITIS: A PRE-POST ANALYSIS OF 16,255 PATIENTS**  
11  
12 4 **PARTICIPATING IN GOOD LIFE WITH OSTEOARTHRITIS IN**  
13  
14  
15 5 **DENMARK (GLA:D®)**

16  
17  
18 6 Dorte T. Grønne<sup>1</sup> PT, MSc, Ewa M. Roos<sup>1</sup> PT, PhD, Rikke Ibsen<sup>2</sup> MSc, Jakob Kjellberg<sup>3</sup> PhD, Søren T.  
19 7 Skou<sup>1,4</sup> PT, PhD

20  
21  
22  
23 8 <sup>1</sup> Research Unit for Musculoskeletal Function and Physiotherapy, Department of Sports Science and Clinical  
24 9 Biomechanics, University of Southern Denmark, Denmark

25  
26  
27  
28 10 <sup>2</sup> I2minds, Aarhus, Denmark

29  
30  
31 11 <sup>3</sup> VIVE - The Danish Center for Social Science Research, Copenhagen, Hovedstaden, Denmark

32  
33  
34 12 <sup>4</sup> The Research Unit PROgrez, Department of Physiotherapy and Occupational Therapy, Næstved-Slagelse-  
35 13 Ringsted Hospitals, Denmark

36  
37  
38 14 **Emails:**

39  
40  
41 15 DTG: [dgronne@health.sdu.dk](mailto:dgronne@health.sdu.dk); EMR: [eroos@health.sdu.dk](mailto:eroos@health.sdu.dk); RI: [rikke@i2minds.dk](mailto:rikke@i2minds.dk); JK:  
42 16 [jakj@vive.dk](mailto:jakj@vive.dk); STS: [stskou@health.sdu.dk](mailto:stskou@health.sdu.dk)

43  
44  
45  
46 17 **Corresponding author:**

47  
48  
49 18 Dorte Thalund Grønne; IOB, SDU, Campusvej 55; DK-5230 Odense M; email:  
50 19 [dgronne@health.sdu.dk](mailto:dgronne@health.sdu.dk); Telephone: +45 40 77 99 39

51  
52  
53  
54 20 **Original research article for BMJ Open**

55  
56  
57  
58 21 Word count abstract: 298 words

22 Word count manuscript: 4.256

## 23 **ABSTRACT**

24 **Objectives:** To evaluate one-year cost-effectiveness of an 8-week supervised education and  
25 exercise program delivered in primary care to patients with symptomatic knee or hip osteoarthritis  
26 (OA).

27 **Design:** A registry-based pre-post study linking patient level data from the Good Life with  
28 osteoArthritis in Denmark (GLA:D®) registry to national registries in Denmark.

29 **Setting and participants:** 16,255 patients with symptomatic knee or hip OA attending GLA:D®.

30 **Intervention:** GLA:D® is a structured supervised patient education and exercise program delivered  
31 by certified physiotherapists and implemented in Denmark.

32 **Outcome measures:** Adjusted health care costs per Quality-Adjusted Life Year (QALY) gained  
33 from baseline to one year (ratio of change in health care costs to change in EQ-5D). All adjusted  
34 measures were estimated using a generalized estimating equation gamma regression model for  
35 repeated measures. Missing data on EQ-5D were imputed with Multiple Imputations (3 months:  
36 23%; 1 year: 39 %).

37 **Results:** Adjusted change in health care cost was 298€ (95% CI: 206-419) and 640€ (95% CI: 400-  
38 1,009) and change in EQ-5D was 0.035 (95% CI: 0.033-0.037) and 0.028 (95% CI: 0.025-0.032)  
39 for knee and hip patients, respectively. Hence estimated adjusted health care costs per QALY  
40 gained was 8,497€ (95% CI: 6,242-11,324) for knee and 22,568€ (95% CI: 16,000-31,531) for hip  
41 patients. In patients with high compliance, the adjusted health care costs per QALY gained was  
42 5,438€ (95% CI: 2,758-9,231) for knee and 17,330€ (95% CI: 10,041-29,364) for hip patients.  
43 Health care costs per QALY were below conventional thresholds for willingness-to-pay at 22,804€

1  
2  
3  
4 44 (20,000£) and 43,979€ (50,000 USD), except the upper limit of the 95% CI for hip patients which  
5  
6  
7 45 was in between the two thresholds.  
8  
9

10 46 **Conclusions:** A structured 8-week supervised education and exercise program delivered in primary  
11  
12 47 care was cost-effective at one year in patients with knee or hip OA supporting large scale  
13  
14 48 implementation in clinical practice.  
15  
16  
17 49

18  
19  
20 50 **Keywords:** knee, hip, osteoarthritis, exercise therapy, patient education, cost-effectiveness  
21  
22  
23 51

## 27 52 **STRENGTHS AND LIMITATIONS OF THIS STUDY**

- 30 53 • The study included a large number of rural and urban patients with knee or hip OA treated  
31  
32  
33 54 in primary care across Denmark.
- 34  
35 55 • All costs reported are real-life costs retrieved on an individual level from a range of high-  
36  
37 56 quality national registries.
- 38  
39  
40 57 • The study is a pre-post study reporting change in health care costs against change in generic  
41  
42 58 health related quality of life (EQ-5D).
- 43  
44  
45 59 • Health care costs per Quality-Adjusted Life Year (QALY) was reported in a one-year  
46  
47 60 horizon and additional change in health care costs were reported in a three-year horizon.
- 48  
49 61 • 23% and 39 % of the patients did not provide data on EQ-5D immediately following the  
50  
51 62 intervention and at one year respectively, and the missing data was imputed with Multiple  
52  
53 63 Imputations.  
54  
55  
56  
57  
58  
59  
60

1  
2  
3  
4  
5  
6  
7  
8  
9  
10  
11  
12  
13  
14  
15  
16  
17  
18  
19  
20  
21  
22  
23  
24  
25  
26  
27  
28  
29  
30  
31  
32  
33  
34  
35  
36  
37  
38  
39  
40  
41  
42  
43  
44  
45  
46  
47  
48  
49  
50  
51  
52  
53  
54  
55  
56  
57  
58  
59  
60

## 64 INTRODUCTION

65

66 Knee and hip osteoarthritis (OA) are major contributors to disability and chronic pain worldwide  
67 and the implications for both the patients and health care systems are severe,[1,2]. The cost related  
68 to OA is estimated to be between 1% and 2.5% of a country's gross domestic product (GDP) in  
69 high-income countries,[1], and total annual costs in Europe are estimated to be up to 817 billion €  
70 (2013),[3]. The number of people living with OA has increased over the last years and is expected  
71 to increase substantially in the future due to an ageing and more overweight and obese  
72 population,[4]. This will have extensive societal impact, emphasizing the need for identifying and  
73 implementing cost-effective treatment options that can help relieve the pressure health care services  
74 are facing around the world,[4].

75

76 Clinical guidelines recommend a stepwise treatment approach, including education and exercise  
77 therapy as first-line treatment for knee and hip OA,[5-8] with substantial evidence supporting the  
78 effects of supervised exercise therapy on pain and physical function,[9-10]. However, studies of  
79 quality of care report that exercise therapy is underutilized, estimated to be provided to less than  
80 40% of patients with OA,[11,12]. To support the implementation of clinical guidelines into clinical  
81 practice, Good Life with osteoArthritis in Denmark (GLA:D<sup>®</sup>) was initiated in 2013 and has been  
82 implemented across Denmark. The treatment part of GLA:D<sup>®</sup> is an 8-week supervised patient  
83 education and exercise therapy program delivered in primary care for patients with knee or hip OA  
84 and has shown positive results on pain, physical function, quality of life (QOL), intake of  
85 painkillers and sick leave,[13].

86

1  
2  
3  
4 87 Results from previous evaluations of the cost-effectiveness of first-line treatment including exercise  
5  
6 88 therapy and targeting knee or hip OA are heterogeneous, and little is known about the cost-  
7  
8  
9 89 effectiveness of supervised education and exercise therapy implemented in primary care,[14,15].  
10  
11 90 Such evaluation is warranted when deciding whether to implement a structured first-line treatment  
12  
13 91 program, and therefore the aim of the study was to evaluate the cost-effectiveness of GLA:D®. We  
14  
15  
16 92 hypothesized that GLA:D® would be cost-effective for both knee and hip OA patients.  
17  
18  
19 93

## 21 94 **METHOD**

### 25 95 26 27 28 96 **Study Design**

29  
30  
31 97  
32  
33  
34 98 This is a registry-based pre-post study evaluating the cost-effectiveness in a healthcare payer  
35  
36 99 perspective of an 8-week supervised education and exercise therapy program (GLA:D®) for patients  
37  
38  
39 100 with symptomatic knee or hip OA by linking patient level data from the GLA:D® registry to  
40  
41 101 national registries in Denmark. In the primary analysis, we reported health care costs in a healthcare  
42  
43 102 payer perspective per QALY gained in a one-year horizon calculated as the ratio of change in health  
44  
45  
46 103 care costs to change in QOL in the same patients. In addition, as a secondary analysis, mean actual  
47  
48 104 health care costs and costs to home care and public transfer payments were reported in a three-year  
49  
50 105 horizon to assess how costs develop over time in this population of patients with a chronic  
51  
52  
53 106 condition. The study conforms to the CHEERS statement for reporting health economic evaluations  
54  
55 107 and recommendations for reporting cost-effectiveness analyses,[16,17].  
56  
57  
58 108  
59  
60

1  
2  
3  
4  
5  
6  
7  
8  
9  
10  
11  
12  
13  
14  
15  
16  
17  
18  
19  
20  
21  
22  
23  
24  
25  
26  
27  
28  
29  
30  
31  
32  
33  
34  
35  
36  
37  
38  
39  
40  
41  
42  
43  
44  
45  
46  
47  
48  
49  
50  
51  
52  
53  
54  
55  
56  
57  
58  
59  
60**Intervention**

110

GLA:D<sup>®</sup> is a structured treatment program delivered over approximately 8 weeks consisting of two patient education sessions, a session with an expert patient, when available, and of 12 one-hour sessions (delivered twice weekly) of supervised group-based neuromuscular exercise therapy,[18,19]. Treating therapists are physiotherapists certified to deliver the intervention on a 2-day course at the University of Southern Denmark delivered by researchers, clinicians, and a former patient. All therapists were instructed in how to diagnose osteoarthritis and informed about differential diagnosis. Patients are usually referred to the program by their general practitioner or an orthopaedic surgeon, but they may also refer themselves directly. From 2014 to 2016, the GLA:D<sup>®</sup> program was delivered in 283 private clinics across the country and in 28 municipal rehabilitation centers of 98 municipalities in Denmark. Most of the patients attending the program in private physiotherapy clinics would receive public reimbursement of approximately 40% of the fee and most patients attending municipal rehabilitation centers would not be charged. A detailed description of the GLA:D<sup>®</sup> program has previously been published,[13].

The GLA:D<sup>®</sup> registry has previously been approved by the Danish Data Protection Agency (no. 10.084) and according to the local ethics committee of the North Denmark Region, ethics approval of GLA:D<sup>®</sup> was not needed. According to the Danish Data Protection Act, patient consent was not required as personal data was processed exclusively for research and statistical purposes.

128

**Population**

130



1  
2  
3  
4 131 Patients are eligible for the GLA:D® program if they have a clinical diagnosis of knee and/or hip  
5  
6 132 OA as evaluated by the treating physiotherapist i.e. pain or functional limitations associated with  
7  
8  
9 133 knee or hip OA and do not meet any of the following exclusion criteria: 1) another reason for the  
10  
11 134 joint symptoms than OA (e.g. tumor, inflammatory joint disease or patellar tendinopathy), 2) other  
12  
13 135 symptoms that are more pronounced than the OA symptoms (e.g. chronic generalized pain or  
14  
15 fibromyalgia), or 3) do not understand Danish. According to international,[20] and Danish,[21]  
16 136 guidelines radiographs are not needed for a clinical diagnosis of OA, and therefore not part of the  
17  
18 137 GLA:D® eligibility criteria. The current study included patients enrolled between February 4, 2014,  
19  
20 138 when collection of the EuroQoL 5-Dimensions 5-Level questionnaire (EQ-5D) was initiated, and  
21  
22 139 December 31, 2016, allowing for one year follow up since information on all costs was available  
23  
24 140 until the end of 2017. Patients with available baseline information on EQ-5D and information on  
25  
26 141 whether a knee or a hip joint was the most affected joint were included in the study. Reporting  
27  
28 142 mean costs in a three-year horizon was restricted to patients entering the program before December  
29  
30 143 31, 2014, allowing for three-year follow up, and reporting costs for public transfer payments were  
31  
32 144 restricted to patients aged 18 to 63 years both in the pre- and post-intervention period to ensure that  
33  
34 145 they did not turn 65 during the post-period which was the retirement age in Denmark in 2017. To  
35  
36 146 cover living expenses public transfer payments are in Denmark provided to adults under the age of  
37  
38 147 retirement who e.g. are unemployed, have low/no ability to work or are enrolled in education.  
39  
40 148 Please find more information about the Danish health care system elsewhere,[22].  
41  
42  
43  
44  
45  
46 149  
47  
48  
49 150  
50  
51  
52 151 **Variables**  
53  
54  
55 152  
56  
57  
58  
59  
60

1  
2  
3  
4  
5  
6  
7  
8  
9  
10  
11  
12  
13  
14  
15  
16  
17  
18  
19  
20  
21  
22  
23  
24  
25  
26  
27  
28  
29  
30  
31  
32  
33  
34  
35  
36  
37  
38  
39  
40  
41  
42  
43  
44  
45  
46  
47  
48  
49  
50  
51  
52  
53  
54  
55  
56  
57  
58  
59  
60

153 Data in the GLA:D<sup>®</sup> registry are collected at baseline, following the intervention (~3 months as the  
154 program is implemented in primary care and some variation in follow up time occurs), and at 12  
155 months and includes demographics, a mix of therapist and patient-reported health measures and  
156 outcome measures as well as compliance,[13]. Via the Civil Registration number (CPR), which  
157 identifies every citizen in Denmark, the GLA:D<sup>®</sup> registry was linked to national registries from  
158 where actual individual level utilization of somatic health care services (including use of primary  
159 health care services, secondary health care services, and use of preceptive medication; i.e. excluding  
160 use of psychiatric health care services), home care, and public transfer payments were  
161 retrieved,[22]. In Denmark home care including practical help and personal care is offered to  
162 citizens with low functional level who are unable to manage everyday life on their own. All prices  
163 and costs were converted into Euros (€) and reported in present values (2017-level) based on the  
164 Danish Consumer Price Index. Costs were given as mean costs per month (one-year horizon) or  
165 year (three-year horizon) and public transfer payments were given as full-time weeks (37 h per  
166 week) per month (one-year horizon) or per year (three-year horizon).

167 Costs related to primary health care services, including visits to physiotherapist, chiropractor,  
168 general practitioner, and others (e.g. medical specialist, laboratory work, dentist), were obtained  
169 from the Danish National Health Insurance Service Registry. Within the primary health care sector  
170 in Denmark physiotherapy is delivered both in private clinics and in municipality settings however,  
171 costs for interventions delivered in municipal settings were not available and therefore not included  
172 in the analysis. Services and admissions related to secondary health care, including total somatic  
173 inpatient and outpatient services, were obtained from the Danish National Patient Registry and  
174 associated costs were estimated based on the Danish Case Mix System which organize patients with  
175 similar diseases and similar expenses into groups that each have annually adjusted tariffs that  
176 reflects practice. The Danish National Patient Registry holds information on all inpatient

1  
2  
3  
4 177 admissions and outpatient activities, including accident and emergency visits in Danish hospitals.  
5  
6  
7 178 Every contact is coded in a classification system incorporating ICD-10 codes and use of resources  
8  
9 179 in contacts where surgery in the knee or hip occurred were reported separately. Costs for  
10  
11 180 prescriptive medications were obtained from the Danish National Prescription Registry holding  
12  
13 181 information on all prescriptions on medications, including date of purchase, number of packages  
14  
15  
16 182 and the reimbursement paid by public funds. All drugs are classified according to the Anatomical  
17  
18 183 Therapeutic Chemical Classification System (ATC) and painkillers (ATC-codes: N02A, N02B,  
19  
20 184 M01A, M02AA) and other medications were reported separately. Individual level information on  
21  
22  
23 185 number and duration of visits for personal care and practical help, respectively, was retrieved from  
24  
25 186 Statistics Denmark and the average care costs per hour (2017) in Denmark was used to calculate  
26  
27 187 costs. Information on nursing care was not available and therefore not included in the analysis.  
28  
29  
30 188 Information on public transfer payments was retrieved from the Registry for Public Transfers,  
31  
32 189 which holds information on type and hours of public transfer payments and was reported as the  
33  
34 190 number of weeks receiving transfer payment (unemployment, sheltered employment, sick leave,  
35  
36 191 rehabilitation, education, disability pension, early retirement).  
37  
38  
39 192  
40  
41 193 Outcome was reported as QALYs gained measured with EQ-5D converted into an index score using  
42  
43 194 time-trade-off based weights from the Danish crosswalk value set (-0.624 to 1; worst to best),[23].  
44  
45  
46 195 The EQ-5D comprises of five dimensions: Mobility, self-care, usual activities, pain discomfort and  
47  
48 196 anxiety/depression each having five levels of response options from 'no problems' to 'severe  
49  
50 197 problems',[24]. QALYs combine time lived and QOL into a single index number where '1'  
51  
52  
53 198 corresponds to one year of full health and '0' corresponds to being dead.  
54  
55 199  
56  
57  
58  
59  
60

1  
2  
3  
4 200 Information on the covariates age (continuous), sex (male or female), marital status  
5  
6 201 (married/coliving or single), ethnic background (western [countries in EU, associated countries and  
7  
8 the four Anglo-Saxon countries] or not western [other countries]), educational level (primary,  
9 202 secondary, vocational, short-term, bachelor, long-term or unknown) and administrative region  
10  
11 203 (Capital, Zealand, Southern Denmark, Central Denmark or North Denmark) were retrieved from the  
12 204 Danish Civil Registration System. Most affected joint (knee or hip) and information on compliance  
13  
14 205 were therapist-reported and high compliance was defined as patients attending at least 10  
15  
16 206 supervised exercise sessions. Type of clinic (private or municipal) was retrieved from the GLA:D®  
17  
18 207 registry and whether the patient died during follow up was retrieved from the Danish Civil  
19  
20 208 Registration System.  
21  
22 209  
23  
24  
25  
26  
27  
28  
29

## 30 211 **Statistical analyses**

31  
32  
33 212  
34  
35  
36 213 Descriptive statistics for baseline characteristics, average actual and adjusted costs from somatic  
37  
38 health care services and home care and average and adjusted weeks receiving public transfer  
39 214 payments one year prior to and one or three years after entering the program, respectively, were  
40  
41 215 reported. To take the potential influence of covariates into account, actual costs and weeks receiving  
42  
43 216 public transfer payments were adjusted using a generalized estimating equation (GEE) gamma  
44  
45 217 regression model for repeated measures. A model for repeated measures was applied as the same  
46  
47 218 patients were included in the pre and post period. Statistically significant difference between costs  
48  
49 219 in the pre- and post-intervention period was assessed using bootstrap t-test.  
50  
51 220  
52  
53  
54  
55  
56 221  
57  
58  
59  
60

1  
2  
3  
4 222 We estimated health care costs per QALY gained as the ratio of change in actual total health care  
5  
6 223 costs to change in QOL. Change in health care costs was calculated as the mean cost difference  
7  
8  
9 224 between the year prior to and the year after entering the intervention. QALYs gained was calculated  
10  
11 225 as the mean difference between the EQ-5D score at baseline, calculated as ‘the area under the  
12  
13 226 curve’ taking change over time into account, representing the QOL the year after entering the  
14  
15  
16 227 program (Figure S1, Supplementary Appendix). Data were not normal distributed and changes in  
17  
18 228 costs and EQ-5D were estimated using a GEE gamma regression model for repeated measures.  
19  
20

21 229 In the first step change in health care costs and change in QOL were estimated in two different  
22  
23  
24 230 models, where both raw and adjusted analyses were conducted including gender, age, marital status,  
25  
26 231 ethnicity, educational level and region as covariates. In case of no convergence in the model,  
27  
28 232 selected covariates were omitted. In the second step the ratio of change in health care costs to  
29  
30  
31 233 change in QOL were calculated.  
32  
33

34 234  
35  
36  
37 235 There is no official threshold for willingness-to-pay in Denmark and we compared the health care  
38  
39 236 cost per QALY to predefined willingness-to-pay thresholds of a cost-effective treatment defined by  
40  
41  
42 237 the National Institute for Health and Care Excellence (NICE) at 22,804€ (20,000£) per QALY,[25]  
43  
44 238 and the widely used threshold of 43,979€ (50,000 USD) per QALY,[26]. To explore if adherence to  
45  
46 239 the exercise therapy component had an impact on the results, a sub-analysis repeating all analyses  
47  
48  
49 240 restricted to patients with high compliance was conducted. All analyses were reported separately for  
50  
51 241 knee and hip patients.  
52  
53

54 242  
55  
56  
57  
58  
59  
60

1  
2  
3  
4  
5  
6  
7  
8  
9  
10  
11  
12  
13  
14  
15  
16  
17  
18  
19  
20  
21  
22  
23  
24  
25  
26  
27  
28  
29  
30  
31  
32  
33  
34  
35  
36  
37  
38  
39  
40  
41  
42  
43  
44  
45  
46  
47  
48  
49  
50  
51  
52  
53  
54  
55  
56  
57  
58  
59  
60

243 As previously proposed for cost-effectiveness studies and clinical trials in OA,[27,28] missing  
244 values for the EQ-5D index score at follow up were imputed using Multiple Imputations (MI) with  
245 chained equations under the assumption of data being missing at random,[29]. Since EQ-5D was  
246 not normal distributed, Predictive Mean Matching was applied, and all baseline variables presented  
247 in the study and outcome variables of interest were included in the model. In total, 40 datasets were  
248 generated, approximately equal to the largest percentages of missing observations for the outcome  
249 as recommended,[30].

251 Since costs for health care services delivered in municipal settings were not available, all analyses  
252 were repeated stratified for patients attending GLA:D® in private physiotherapy clinics vs. in  
253 municipal rehabilitation centers. To explore the impact of missing data, a sensitivity analysis  
254 repeating all analyses restricted to complete cases was conducted and all analyses were repeated  
255 excluding patients who died during follow up.

257 The significance level for all statistical analyses was defined a priori at  $p < 0.05$ . All analyses were  
258 performed using the SAS 9.4 (SAS Institute, North Carolina, USA).

## RESULTS

261  
262 12,162 knee patients and 4,093 hip patients were included in the study and follow up data on EQ-  
263 5D were available for 77% immediately after treatment and 61% at one year (Figure 1). Patients  
264 with complete information had slightly better, but most likely not clinically relevant better health  
265 status at baseline compared to patients with incomplete information (Table S1, Supplementary

1  
2  
3  
4 266 Appendix). Baseline characteristics are presented in Table 1. Three quarters of the patients were  
5  
6  
7 267 female, median symptom duration was 2 years, almost two thirds reported use of pain medication  
8  
9 268 and 31% and 4% of knee and hip patients, respectively, reported previous surgery in most affected  
10  
11 269 joint. Seven percent and 17% of knee and hip patients, respectively, reported to have had a joint  
12  
13 270 replacement surgery between start intervention and the 12 m follow up measurement.  
14  
15

16 271  
17  
18  
19 272 [Figure 1]  
20  
21

22 273 [Table 1]  
23  
24

25 274  
26  
27  
28 275 Adjusted health care costs and costs for home care one year prior to and three years after entering  
29  
30 276 the intervention are presented in Figure 2a-e, adjusted public transfer payments are presented in  
31  
32 277 Table 2 and mean public transfer payments are presented in Table S2, Supplementary Appendix.  
33  
34 278 Additionally, mean and adjusted costs one year prior to and one/three years after entering the  
35  
36 279 intervention respectively are presented in Table S3 and S4, Supplementary Appendix. To take the  
37  
38 280 potential influence of covariates into account, costs are estimated for average patients, i.e. women,  
39  
40 281 65 years old, married/co-living, ethnic Danish, low educational level and living in the Capital  
41  
42 282 Region. Public transfer payments are estimated for women, 55 years old, married/co-living, ethnic  
43  
44 283 Danish, low educational level and living in the Capital Region since the population was restricted to  
45  
46 284 adults under the age of retirement in this analysis, as public transfer payments target this age group.  
47  
48 285 In the one-year horizon, monthly adjusted health care costs for knee and hip patients were 263€ and  
49  
50 286 235€ one year prior to the intervention, rising to 331€ and 397€ the year after entering the program  
51  
52 287 (Table S4, Supplementary Appendix). In the three-year horizon, yearly adjusted health care costs  
53  
54 288 one year prior to the intervention were 3,392€ and 3,051€ for knee and hip patients, rising to 4,128€  
55  
56  
57  
58  
59  
60

1  
2  
3  
4 289 and 4,473€ the third year after entering the intervention, observing the highest costs the second year  
5  
6  
7 290 post-intervention for knee patients and the first year post-intervention for hip patients (Figure 2a).  
8  
9 291 The increase in mean health care costs was mainly due to costs related to surgeries in the knee or  
10  
11 292 hip which the first year after index date in the adjusted analysis accounted for 46€/month of an  
12  
13 293 increase in costs of 68€/month in knee patients and 130.8€/month of an increase in costs of  
14  
15  
16 294 162.8€/month in hip patients (Table S4, Supplementary Appendix). On average, the raw EQ-5D  
17  
18 295 score increased from 0.711 to 0.756 points for knee patients and from 0.705 to 0.747 for hip  
19  
20 296 patients from baseline to one year follow up (Table 3).

21  
22  
23 297  
24  
25  
26 298 [Figure 2]

27  
28  
29 299 [Table 2]

30  
31  
32 300 [Table 3]

33  
34  
35 301  
36  
37  
38 302 Adjusted change in health care cost from the year prior to entering GLA:D<sup>®</sup> to the year after  
39  
40 303 entering GLA:D<sup>®</sup> was 298€ (95% CI: 206-419) and 640€ (95% CI: 400-1,009) and QALYs gained  
41  
42 304 were 0.035 (95% CI: 0.033-0.037) and 0.028 (95% CI: 0.025-0.032) for knee and hip patients,  
43  
44  
45 305 respectively. Hence, one-year estimated adjusted health care costs was 8,497€ (95% CI: 6,242-  
46  
47 306 11,324) for knee patients and 22,568€ (95% CI: 16,000-31,531) for hip patients per QALY gained  
48  
49  
50 307 (Table 4). Restricting the regression analysis to patients with high compliance, the one-year  
51  
52 308 adjusted health care costs per QALY gained was lower compared to all patients; 5,438€ (95% CI:  
53  
54 309 2,758-9,231) for knee patients and 17,330€ (95% CI: 10,041-29,364) for hip patients primarily due  
55  
56  
57 310 to lower change in health care costs (Table 4). Although the upper limit of the 95% CI for hip  
58  
59 311 patients was in between the two predefined willingness-to-pay thresholds, the estimated health care  
60



1  
2  
3  
4 312 costs per QALY for both knee and hip patients were below both of the two predefined willingness-  
5  
6 313 to-pay thresholds.  
7  
8  
9

10 314  
11  
12 [Table 4]  
13 315  
14  
15 316

17  
18 317 Sensitivity analyses showed that knee and hip patients attending GLA:D® in a private clinic had  
19  
20 similar health care costs per QALY but that patients attending GLA:D® in a municipal setting had  
21 318 higher costs for knee patients and lower costs for hip patients compared to all patients. This  
22  
23 319 difference was primarily explained by different change in health care costs (Table S5,  
24  
25 320 Supplementary Appendix). The complete case analysis showed lower change in health care costs  
26  
27 321 and lower health care costs per QALY for knee patients (4,829€ (95% CI: 2,313-8,378)) but for hip  
28 322 patients the ratio was similar to that of all patients (Table S5, Supplementary Appendix). 53 patients  
29  
30 323 died within the one-year follow up period and 11 of these within the first 3 months. Repeating all  
31  
32 324 analyses excluding deaths in the regression analyses showed results similar to the main analysis  
33  
34 325 (data not shown).  
35  
36  
37 326  
38  
39  
40  
41  
42 327  
43  
44  
45

## 46 328 **DISCUSSION**

47  
48  
49  
50 329

51  
52 330 Our study demonstrated that an 8-week supervised patient education and exercise therapy program  
53  
54 for knee or hip OA implemented in primary care is cost-effective in a one-year horizon with health  
55 331 care costs of 8,497€ per QALY for knee patients and 22,568€ for hip patients who signed up for the  
56  
57 332  
58  
59  
60

1  
2  
3  
4  
5  
6  
7  
8  
9  
10  
11  
12  
13  
14  
15  
16  
17  
18  
19  
20  
21  
22  
23  
24  
25  
26  
27  
28  
29  
30  
31  
32  
33  
34  
35  
36  
37  
38  
39  
40  
41  
42  
43  
44  
45  
46  
47  
48  
49  
50  
51  
52  
53  
54  
55  
56  
57  
58  
59  
60

333 intervention. Despite the physiotherapy visits needed to participate in the GLA:D<sup>®</sup> program,  
334 increased health care costs were primarily related to knee or hip surgeries (accounting for 70 and  
335 80% of the increased costs, respectively) and although the mean absolute change in health related  
336 QOL is relatively low (~0.03) the intervention is still considered cost-effective. These results  
337 support large scale implementation of GLA:D<sup>®</sup> in clinical practice.

338  
339 To our knowledge this is the first study evaluating the cost-effectiveness of a combined supervised  
340 OA education and exercise therapy program with widespread implementation in primary care.  
341 Previous analyses of the GLA:D<sup>®</sup> program, but with twice the number of supervised neuromuscular  
342 exercise sessions, weight loss, insoles and pain medication if needed, have found similar  
343 results,[15,31]. A model-based study suggested that exercise therapy and education was cost-  
344 effective as compared to usual care for patients with knee or hip OA in Canada[31], while an  
345 analysis of results from a randomized trial comparing supervised exercise therapy, education and  
346 other recommended non-surgical interventions to written advice in patients with moderate to severe  
347 knee OA found the intervention to be cost-effective with incremental cost effectiveness ratios of  
348 6,229 to 20,688 €/QALY,[15]. Even though our study is a pre-post study and therefore not directly  
349 comparable our findings are also in line with other previous studies which have indicated that  
350 supervised exercise therapy alone as treatment for OA is cost-effective. Three randomized trials  
351 demonstrated that supervised exercise therapy in addition to usual care, supplementary class-based  
352 exercise in addition to a home-based program and supervised exercise therapy compared to general  
353 practitioner care alone was likely to be cost-effective in people with knee and/or hip OA,[32-34].  
354 Also, a model-based study estimated that adding the combination of diet and exercise therapy to  
355 usual care for overweight and obese patients with knee OA was cost-effective,[35]. Our study adds

1  
2  
3  
4 356 to this body of evidence, that large-scale implementation in clinical practice of a structured  
5  
6  
7 357 combined supervised education and exercise therapy program seems cost-effective in a one-year  
8  
9 358 horizon.

10  
11  
12 359  
13  
14  
15 360 In this study, the increased health care costs both one and three years after entering the GLA:D®  
16  
17  
18 361 program were primarily related to surgeries in the knee or hip. According to a stepwise treatment  
19  
20 362 approach, joint replacement surgery is considered to be relevant in patients with end-stage OA once  
21  
22  
23 363 all appropriate non-surgical treatment options such as patient education and supervised exercise  
24  
25 364 therapy of sufficient dose and length, weight loss, walking aids and pain medication have failed to  
26  
27 365 reduce symptoms sufficiently,[36,37]. Existing evidence indicates that providing supervised  
28  
29  
30 366 exercise therapy can have positive impact on the number of patients having joint replacement  
31  
32 367 surgery,[38-40], time to surgery,[39,40] and outcomes from surgery[41]. Ackerman et al conducted  
33  
34 368 a budget impact analysis of implementing a first-line management program such as GLA:D® in  
35  
36 369 Australia and demonstrated that if total knee replacement was avoided in only 1 in 12 GLA:D®  
37  
38  
39 370 participants, the program would generate cost savings in the Australian health care system,[42].  
40  
41 371 Although the lack of control group in the current study precludes analyses of avoidance of joint  
42  
43 372 replacements, it highlights that regardless of surgery during follow up, supervised education and  
44  
45  
46 373 exercise therapy is cost-effective.

47  
48  
49 374  
50  
51  
52 375 As a result of similar change in EQ-5D, but lower change in health care costs, health care costs per  
53  
54 376 QALY were lower in patients compliant to the intervention (i.e. attending at least 10 supervised  
55  
56  
57 377 exercise sessions) compared to all patients enrolled in the program, indicating that the dosage of  
58  
59 378 exercise therapy is important. Although we did not find that higher compliance was associated with  
60

1  
2  
3  
4 379 greater effects on the EQ-5D, the lower change in health care costs in the compliant patients  
5  
6  
7 380 underlines the importance of exercise dosage as suggested by a systematic review and meta-  
8  
9 381 regression analysis of 48 randomized controlled trials in patients with knee OA showing that 12 or  
10  
11 382 more supervised exercise sessions are more effective than fewer supervised sessions,[43], and a  
12  
13 383 systematic review and meta-analysis in patients with hip OA showing that supervised exercise  
14  
15 384 therapy with high compliance with dose recommendations compared to uncertain compliance  
16  
17  
18 385 (studies where compliance was not possible to categorize according to recommendations) was more  
19  
20 386 effective,[44]. Although dosage seems important for the effect and cost-effectiveness, knowledge of  
21  
22  
23 387 optimal exercise dosage in OA is still lacking,[9,43,45].  
24  
25  
26 388

27  
28  
29 389 As there is no official threshold defining a cost-effective treatment in Denmark, we compared the  
30  
31 390 health care costs per QALY to two different internationally widely used willingness-to-pay  
32  
33 391 thresholds. Although the estimated health care costs per QALY for both knee and hip patients were  
34  
35 392 below both of the two thresholds, the upper limit of the 95% CI for hip patients was in between the  
36  
37  
38 393 two thresholds, thus we cannot rule out that the true health care costs per QALY for hip patients is  
39  
40 394 above the lower willingness-to-pay threshold (22,804€). A threshold value for willingness-to-pay  
41  
42 395 for improvements in health is arbitrary and depending on the context such as budget and other  
43  
44 396 treatment options,[26]. Country-level threshold value based on GDP per capita has been discussed  
45  
46  
47 397 but remains unsettled,[46]. When deciding which treatment options to implement and offer, the  
48  
49 398 results from this study can support clinicians and decision-makers in terms of one-year cost-  
50  
51 399 effectiveness of supervised education and exercise therapy implemented nationwide for patients  
52  
53 400 with knee and hip OA in clinical practice.  
54  
55  
56  
57 401  
58  
59  
60

## 402 **Strengths and limitations**

403

404 The major strength of the study is that all costs reported are real-life costs retrieved on an individual  
405 level from a range of high-quality national registries supporting the reliability and validity of the  
406 costs,[22,47,48]. Even though it is likely that a higher level of heterogeneity in treatment protocols  
407 occurred compared to in rigorous clinical trials, another major strength is that the study included a  
408 large number of rural and urban patients with wide inclusion criteria; joint pain and functional  
409 limitations associated with OA, retrieved from a nationwide registry supporting the generalizability  
410 of the findings.

411

412 The main limitation of the study is that the study is a pre-post study where change in health care  
413 costs was evaluated against change in EQ-5D. Without a proper control group, it cannot be ruled  
414 out that the observed change in EQ-5D is related to other factors than the treatment such as placebo  
415 or regression to the mean. In the analysis EQ-5D measured at baseline represented the QOL the  
416 year prior to the intervention, but there is a risk that the change in QOL were overestimated as  
417 patients often seek treatment at time of worsening of symptoms. Also, change in costs can  
418 potentially have been affected by increasing age, since health care costs are expected to increase  
419 with increased age and accompanied morbidity,[49]. As a consequence of lack of model  
420 convergence marital status and ethnicity was omitted as covariates in the adjusted model evaluating  
421 the costs for home care estimating change in costs per QALY gained in a one-year horizon. As costs  
422 related to home care comprises a rather small proportion of the total costs it is not considered to  
423 affect the main result.

424

1  
2  
3  
4  
5  
6  
7  
8  
9  
10  
11  
12  
13  
14  
15  
16  
17  
18  
19  
20  
21  
22  
23  
24  
25  
26  
27  
28  
29  
30  
31  
32  
33  
34  
35  
36  
37  
38  
39  
40  
41  
42  
43  
44  
45  
46  
47  
48  
49  
50  
51  
52  
53  
54  
55  
56  
57  
58  
59  
60

425 In the current study, health care costs per QALY was evaluated in a one-year horizon and  
426 additionally change in costs were reported in a three-year horizon. OA is a long-term chronic  
427 condition,[36], thus evaluating cost-effectiveness in a one-year horizon is a relatively short time  
428 horizon warranting further long-term cost-effective analyses. However, a recent model-based cost-  
429 effectiveness analysis suggested that a physical activity program for patients with knee OA would  
430 lead to favorable long-term clinical and economic benefits,[50].

431  
432 Only around 60% of the costs covering the program for most patients attending GLA:D<sup>®</sup> in private  
433 physiotherapy clinics were taken into account in the analyses i.e. patients out-of-pocket costs and  
434 costs covering the program in municipal settings as well as medications bought over the counter  
435 were not included. As the increase in costs in the primary health care sector and in costs covering  
436 medications the first year following index date only constitute a very low proportion of the  
437 increased costs in total, this limitation is not considered to substantially affect the overall results.

438  
439 There was a loss to follow up in the GLA:D<sup>®</sup> registry and conducting a sensitivity analysis  
440 restricted to patients with complete information revealed that they had less mean change in health  
441 care costs than all included patients, indicating a risk of selective loss to follow up in the GLA:D<sup>®</sup>  
442 registry, however, the evaluation on health care costs per QALY included all patients enrolled in  
443 GLA:D<sup>®</sup>, imputing the missing outcome values at follow up. Imputing missing outcome values  
444 relied on the assumption that data were missing at random, i.e. the missingness was related to  
445 variables included in the model. However, there is a risk that loss to follow up was related to  
446 unobserved factors not available for the analysis (e.g. good or bad outcome from the GLA:D<sup>®</sup>  
447 program). One third did not provide information on compliance and there is a risk that lower change

1  
2  
3  
4  
5  
6  
7  
8  
9  
10  
11  
12  
13  
14  
15  
16  
17  
18  
19  
20  
21  
22  
23  
24  
25  
26  
27  
28  
29  
30  
31  
32  
33  
34  
35  
36  
37  
38  
39  
40  
41  
42  
43  
44  
45  
46  
47  
48  
49  
50  
51  
52  
53  
54  
55  
56  
57  
58  
59  
60

448 in health care costs in the sub-group of patients with high compliance is affected by selection bias  
449 i.e. that the lower change in health care costs could be due to systematically differences in the use of  
450 health care services between those providing and not providing information about compliance rather  
451 than due to the intervention. However, we did not find clinically relevant health status differences at  
452 baseline among those not providing information on compliance compared to those who provided  
453 this information (data not shown).

454  
455 The current study is based on real-world outcome data collected in nationwide physiotherapy clinics  
456 and actual health care costs retrieved from national registries, supporting the generalizability of the  
457 results. However, patients attending GLA:D® are a preselected group of patients who are commonly  
458 referred to physiotherapy for their symptoms with most being able to pay partly for the intervention,  
459 which might limit the generalizability.

## 461 CONCLUSIONS

462  
463 A structured 8-week supervised education and exercise therapy program delivered in physiotherapy  
464 practice was cost-effective at one year in patients with knee and hip OA compared to conventional  
465 willingness-to-pay thresholds except the upper limit of the 95% CI for hip patients which was in  
466 between two thresholds. Both health-related QOL and health care costs increased during the one-  
467 year time horizon, the latter mainly due to knee or hip surgeries. The results support large scale  
468 implementation of a structured supervised evidence-based patient education and exercise therapy  
469 program targeting patients with knee or hip OA and can guide clinicians and decision makers on  
470 what to expect when such programs are implemented in clinical practice.

1  
2  
3  
4  
5  
6  
7  
8  
9  
10  
11  
12  
13  
14  
15  
16  
17  
18  
19  
20  
21  
22  
23  
24  
25  
26  
27  
28  
29  
30  
31  
32  
33  
34  
35  
36  
37  
38  
39  
40  
41  
42  
43  
44  
45  
46  
47  
48  
49  
50  
51  
52  
53  
54  
55  
56  
57  
58  
59  
60

## 471 **ACKNOWLEDGMENTS**

472

473 The authors would like to thank the clinicians and patients involved in collecting data for GLA:D®.

474

## 475 **PATIENT AND PUBLIC INVOLVEMENT STATEMENT**

476 Patients and the public were not involved in the design, conduct, reporting, or dissemination plans  
477 of this research.

478

## 479 **DATA SHARING STATEMENT**

480 The data from the national Danish registries used in this study is available from Statistics Denmark.  
481 However, restrictions apply to the availability, as the data was used under license for the current  
482 study, and so are not publicly available. Data are however available from the authors ER and STS  
483 upon reasonable request and with permission of Statistics Denmark.

484

## 485 **AUTHOR CONTRIBUTIONS**

486

487 Study conception and design: DTG, ER, RI, JK, STS

488 Acquisition of data: DTG, ER, STS

489 Analysis and interpretation of data: DTG, ER, RI, JK, STS



1  
2  
3  
4 490 Drafting the article: DTG, STS  
5  
6

7 491 Revising the article critically for important intellectual content: DTG, ER, RI, JK, STS  
8  
9

10 492 Final approval of the article: DTG, ER, RI, JK, STS  
11  
12

13 493 Obtaining of funding: STS  
14  
15  
16

17 494  
18  
19

## 20 495 **ROLE OF THE FUNDING SOURCE** 21 22 23

24 496  
25  
26

27 497 This work was supported by the Danish Rheumatism Association and the Physiotherapy Practice  
28  
29

30 498 Foundation. Grant numbers not applicable.  
31  
32

33 499 The Danish Physiotherapist Association's fund for research, education and practice development;  
34  
35

36 500 the Danish Rheumatism Association; and the Physiotherapy Practice Foundation have previously  
37  
38

39 501 supported GLA:D®.  
40  
41

42 502  
43  
44

45 503 Dr. Skou is currently funded by a grant from Region Zealand (Exercise First) and a grant from the  
46  
47

48 504 European Research Council (ERC) under the European Union's Horizon 2020 research and  
49  
50

51 505 innovation program (grant agreement No 801790).  
52  
53

54 506  
55  
56

57 507 None of the funding sources had any role in the study other than to provide funding.  
58  
59  
60

1  
2  
3  
4  
5  
6  
7  
8  
9  
10  
11  
12  
13  
14  
15  
16  
17  
18  
19  
20  
21  
22  
23  
24  
25  
26  
27  
28  
29  
30  
31  
32  
33  
34  
35  
36  
37  
38  
39  
40  
41  
42  
43  
44  
45  
46  
47  
48  
49  
50  
51  
52  
53  
54  
55  
56  
57  
58  
59  
60

## 509 **CONFLICT OF INTEREST**

510

511 Dr. Roos is deputy editor of Osteoarthritis and Cartilage, the developer of the Knee injury and  
512 Osteoarthritis Outcome Score (KOOS) and several other freely available patient-reported outcome  
513 measures and co-founder of Good Life with osteoArthritis in Denmark (GLA:D<sup>®</sup>), a not-for profit  
514 initiative hosted at University of Southern Denmark aimed at implementing clinical guidelines for  
515 osteoarthritis in clinical practice.

516

517 Dr. Skou is associate editor of the Journal of Orthopaedic & Sports Physical Therapy, has received  
518 grants from The Lundbeck Foundation, personal fees from Munksgaard, all of which are outside the  
519 submitted work. He is co-founder of GLA:D<sup>®</sup>.

520

521 R Ibsen: None

522

523 J Kjellberg: None

524

525 Dr. Grønne is employed as data manager in the GLA:D<sup>®</sup> project.

526

## 527 **Ethics Statement**

528

1  
2  
3  
4  
5  
6  
7  
8  
9  
10  
11  
12  
13  
14  
15  
16  
17  
18  
19  
20  
21  
22  
23  
24  
25  
26  
27  
28  
29  
30  
31  
32  
33  
34  
35  
36  
37  
38  
39  
40  
41  
42  
43  
44  
45  
46  
47  
48  
49  
50  
51  
52  
53  
54  
55  
56  
57  
58  
59  
60

529 As the study is a registry-based study, according to Danish legislation ethical approval is not needed  
530 and according to the local ethics committee of the North Denmark Region, ethics approval of  
531 GLA:D<sup>®</sup> was not needed.

For peer review only

1  
2  
3  
4  
5 532 **REFERENCES**

- 6  
7  
8 533  
9  
10  
11 534 1. Hunter DJ, Schofield D, Callander E. The individual and socioeconomic impact of osteoarthritis. *Nature*  
12  
13 535 *reviews Rheumatology* 2014;10(7):437-41. doi: 10.1038/nrrheum.2014.44 [published Online First:  
14  
15 536 2014/03/26]
- 16  
17 537 2. Kingsbury SR, Gross HJ, Isherwood G, et al. Osteoarthritis in Europe: impact on health status, work  
18  
19  
20 538 productivity and use of pharmacotherapies in five European countries. *Rheumatology (Oxford,*  
21  
22 539 *England)* 2014;53(5):937-47. doi: 10.1093/rheumatology/ket463 [published Online First:  
23  
24 540 2014/02/04]
- 25  
26 541 3. Salmon JH, Rat AC, Sellam J, et al. Economic impact of lower-limb osteoarthritis worldwide: a systematic  
27  
28  
29 542 review of cost-of-illness studies. *Osteoarthritis and cartilage* 2016;24(9):1500-8. doi:  
30  
31 543 10.1016/j.joca.2016.03.012 [published Online First: 2016/04/02]
- 32  
33 544 4. Saeid Safiri A-AK, Emma Smith, Catherine Hill, Deepti Bettampadi, Mohammad Ali Mansournia, Damian  
34  
35 545 Hoy, Ahad Ashrafi-Asgarabad, Mahdi Sepidarkish, Amir Almasi-Hashiani, Gary Collins, Jay Kaufman,  
36  
37 546 Mostafa Qorbani, Maziar Moradi-Lakeh, Anthony D Woolf, Francis Guillemin, Lyn March, Marita  
38  
39  
40 547 Cross. Global, Regional and National Burden of Osteoarthritis 1990-2017: A Systematic Analysis of  
41  
42 548 the Global Burden of Disease Study 2017. *Ann Rheum Dis* 2020;79(6):9. doi: 10.1136/annrheumdis-  
43  
44 549 2019-216515 [published Online First: 2020 May 12]
- 45  
46 550 5. Fernandes L, Hagen KB, Bijlsma JW, et al. EULAR recommendations for the non-pharmacological core  
47  
48  
49 551 management of hip and knee osteoarthritis. *Annals of the rheumatic diseases* 2013;72(7):1125-35.  
50  
51 552 doi: 10.1136/annrheumdis-2012-202745 [published Online First: 2013/04/19]
- 52  
53 553 6. Bannuru RR, Osani MC, Vaysbrot EE, et al. OARSI guidelines for the non-surgical management of knee,  
54  
55 554 hip, and polyarticular osteoarthritis. *Osteoarthritis and cartilage / OARS, Osteoarthritis Research*  
56  
57  
58 555 *Society* 2019;27(11):1578-89. doi: 10.1016/j.joca.2019.06.011 [published Online First: 2019/07/07]  
59  
60

1  
2  
3  
4  
5  
6  
7  
8  
9  
10  
11  
12  
13  
14  
15  
16  
17  
18  
19  
20  
21  
22  
23  
24  
25  
26  
27  
28  
29  
30  
31  
32  
33  
34  
35  
36  
37  
38  
39  
40  
41  
42  
43  
44  
45  
46  
47  
48  
49  
50  
51  
52  
53  
54  
55  
56  
57  
58  
59  
60

- 556 7. Nelson AE, Allen KD, Golightly YM, et al. A systematic review of recommendations and guidelines for the  
557 management of osteoarthritis: The chronic osteoarthritis management initiative of the U.S. bone  
558 and joint initiative. *Semin Arthritis Rheum* 2014;43(6):701-12. doi:  
559 10.1016/j.semarthrit.2013.11.012 [published Online First: 2014/01/07]
- 560 8. Kolasinski SL, Neogi T, Hochberg MC, et al. 2019 American College of Rheumatology/Arthritis Foundation  
561 Guideline for the Management of Osteoarthritis of the Hand, Hip, and Knee. *Arthritis &*  
562 *rheumatology (Hoboken, NJ)* 2020;72(2):220-33. doi: 10.1002/art.41142 [published Online First:  
563 2020/01/08]
- 564 9. Fransen M, McConnell S, Harmer AR, et al. Exercise for osteoarthritis of the knee: a Cochrane systematic  
565 review. *British journal of sports medicine* 2015;49(24):1554-7. doi: 10.1136/bjsports-2015-095424  
566 [published Online First: 2015/09/26]
- 567 10. Fransen M, McConnell S, Hernandez-Molina G, et al. Exercise for osteoarthritis of the hip. *The Cochrane*  
568 *database of systematic reviews* 2014(4):Cd007912. doi: 10.1002/14651858.CD007912.pub2  
569 [published Online First: 2014/04/24]
- 570 11. Hagen KB, Smedslund G, Østerås N, et al. Quality of Community-Based Osteoarthritis Care: A Systematic  
571 Review and Meta-Analysis. *Arthritis care & research* 2016;68(10):1443-52. doi: 10.1002/acr.22891  
572 [published Online First: 2016/03/19]
- 573 12. Smith T, Collier TS, Smith B, et al. Who seeks physiotherapy or exercise treatment for hip and knee  
574 osteoarthritis? A cross-sectional analysis of the English Longitudinal Study of Ageing. *International*  
575 *journal of rheumatic diseases* 2019;22(5):897-904. doi: 10.1111/1756-185x.13480 [published  
576 Online First: 2019/02/08]
- 577 13. Skou ST RE. Good Life with osteoArthritis in Denmark (GLA:D): evidence-based education and  
578 supervised neuromuscular exercise delivered by certified physiotherapists nationwide. *BMC*  
579 *Musculoskelet Disord* 2017;18:72.

1  
2  
3  
4  
5  
6  
7  
8  
9  
10  
11  
12  
13  
14  
15  
16  
17  
18  
19  
20  
21  
22  
23  
24  
25  
26  
27  
28  
29  
30  
31  
32  
33  
34  
35  
36  
37  
38  
39  
40  
41  
42  
43  
44  
45  
46  
47  
48  
49  
50  
51  
52  
53  
54  
55  
56  
57  
58  
59  
60

- 580 14. Mazzei DR, Ademola A, Abbott JH, et al. Are education, exercise and diet interventions a cost-effective  
581 treatment to manage hip and knee osteoarthritis? A systematic review. *Osteoarthritis and cartilage*  
582 2020 doi: 10.1016/j.joca.2020.10.002 [published Online First: 2020/11/17]
- 583 15. Skou ST, Roos EM, Laursen M, et al. Cost-effectiveness of 12 weeks of supervised treatment compared  
584 to written advice in patients with knee osteoarthritis: a secondary analysis of the 2-year outcome  
585 from a randomized trial. *Osteoarthritis and cartilage* 2020;28(7):907-16. doi:  
586 10.1016/j.joca.2020.03.009 [published Online First: 2020/04/04]
- 587 16. Don Husereau MD, Chris Carswell, David Moher, Dan Greenberg, Federico Augustovski, Andrew H  
588 Briggs, William R Lindsay, Josephine Mauskopf, Elizabeth Loder. Consolidated Health Economic  
589 Evaluation Reporting Standards (CHEERS) statement. *BMJ* 2013;346:f1049.
- 590 17. Sanders GD, Neumann PJ, Basu A, et al. Recommendations for Conduct, Methodological Practices, and  
591 Reporting of Cost-effectiveness Analyses: Second Panel on Cost-Effectiveness in Health and  
592 Medicine. *Jama* 2016;316(10):1093-103. doi: 10.1001/jama.2016.12195 [published Online First:  
593 2016/09/14]
- 594 18. Ageberg E LA, Roos EM. Feasibility of neuromuscular training in patients with severe hip or knee OA: the  
595 individualized goal-based NEMEX-TJR training program. *BMC Musculoskelet Disord* 2010;11:126.
- 596 19. Ageberg E RE. Neuromuscular exercise as treatment of degenerative knee disease. *Exerc Sport Sci Rev*  
597 2015(43):14.
- 598 20. Zhang W, Doherty Ma, Peat G, et al. EULAR evidence-based recommendations for the diagnosis of knee  
599 osteoarthritis. *Annals of the rheumatic diseases* 2010;69(3):483-89.
- 600 21. Knee osteoarthritis - national clinical guidelines and referral guidelines: The Danish Health Authority,  
601 2012.
- 602 22. Schmidt M, Schmidt SAJ, Adelborg K, et al. The Danish health care system and epidemiological research:  
603 from health care contacts to database records. *Clinical epidemiology* 2019;11:563-91. doi:  
604 10.2147/clep.S179083 [published Online First: 2019/08/03]

1  
2  
3  
4  
5  
6  
7  
8  
9  
10  
11  
12  
13  
14  
15  
16  
17  
18  
19  
20  
21  
22  
23  
24  
25  
26  
27  
28  
29  
30  
31  
32  
33  
34  
35  
36  
37  
38  
39  
40  
41  
42  
43  
44  
45  
46  
47  
48  
49  
50  
51  
52  
53  
54  
55  
56  
57  
58  
59  
60

23. Wittrup-Jensen KU, Lauridsen J, Gudex C, et al. Generation of a Danish TTO value set for EQ-5D health states. *Scandinavian journal of public health* 2009;37(5):459-66. doi: 10.1177/1403494809105287 [published Online First: 2009/05/05]
24. Bilbao A, García-Pérez L, Arenaza JC, et al. Psychometric properties of the EQ-5D-5L in patients with hip or knee osteoarthritis: reliability, validity and responsiveness. *Qual Life Res* 2018;27(11):2897-908. doi: 10.1007/s11136-018-1929-x [published Online First: 2018/07/05]
25. National Institute for Health and Care Excellence (NICE). *NICE Process and Methods Guides. Guide to the Methods of Technology Appraisal* 2013. London: National Institute for Health and Care Excellence (NICE)
- Copyright © 2013 National Institute for Health and Clinical Excellence, unless otherwise stated. All rights reserved. 2013.
26. Neumann PJ, Cohen JT, Weinstein MC. Updating cost-effectiveness--the curious resilience of the \$50,000-per-QALY threshold. *The New England journal of medicine* 2014;371(9):796-7. doi: 10.1056/NEJMp1405158 [published Online First: 2014/08/28]
27. Faria R, Gomes M, Epstein D, et al. A guide to handling missing data in cost-effectiveness analysis conducted within randomised controlled trials. *Pharmacoeconomics* 2014;32(12):1157-70. doi: 10.1007/s40273-014-0193-3
28. Losina E, Ranstam J, Collins JE, et al. OARSI Clinical Trials Recommendations: Key analytic considerations in design, analysis, and reporting of randomized controlled trials in osteoarthritis. *Osteoarthritis and cartilage* 2015;23(5):677-85. doi: 10.1016/j.joca.2015.03.011
29. Altman DG, Bland JM. Missing data. *Bmj* 2007;334(7590):424. doi: 10.1136/bmj.38977.682025.2C [published Online First: 2007/02/27]
30. White IR, Royston P, Wood AM. Multiple imputation using chained equations: Issues and guidance for practice. *Stat Med* 2011;30(4):377-99. doi: 10.1002/sim.4067 [published Online First: 2010/11/30]

1  
2  
3  
4  
5  
6  
7  
8  
9  
10  
11  
12  
13  
14  
15  
16  
17  
18  
19  
20  
21  
22  
23  
24  
25  
26  
27  
28  
29  
30  
31  
32  
33  
34  
35  
36  
37  
38  
39  
40  
41  
42  
43  
44  
45  
46  
47  
48  
49  
50  
51  
52  
53  
54  
55  
56  
57  
58  
59  
60

- 628 31. Structured Education and Neuromuscular Exercise Program for Hip and/or Knee Osteoarthritis: A Health  
629 Technology Assessment. *Ontario health technology assessment series* 2018;18(8):1-110. [published  
630 Online First: 2018/11/18]
- 631 32. Abbott JH, Wilson R, Pinto D, et al. Incremental clinical effectiveness and cost effectiveness of providing  
632 supervised physiotherapy in addition to usual medical care in patients with osteoarthritis of the hip  
633 or knee: 2-year results of the MOA randomised controlled trial. *Osteoarthritis and cartilage*  
634 2019;27(3):424-34. doi: 10.1016/j.joca.2018.12.004 [published Online First: 2018/12/17]
- 635 33. Richardson G, Hawkins N, McCarthy CJ, et al. Cost-effectiveness of a supplementary class-based  
636 exercise program in the treatment of knee osteoarthritis. *International journal of technology*  
637 *assessment in health care* 2006;22(1):84-9. doi: 10.1017/s0266462306050872 [published Online  
638 First: 2006/05/06]
- 639 34. Tan SS, Teirlinck CH, Dekker J, et al. Cost-utility of exercise therapy in patients with hip osteoarthritis in  
640 primary care. *Osteoarthritis and cartilage* 2016;24(4):581-8. doi: 10.1016/j.joca.2015.11.010  
641 [published Online First: 2015/12/02]
- 642 35. Losina E, Smith KC, Paltiel AD, et al. Cost-Effectiveness of Diet and Exercise for Overweight and Obese  
643 Patients With Knee Osteoarthritis. *Arthritis care & research* 2019;71(7):855-64. doi:  
644 10.1002/acr.23716 [published Online First: 2018/07/29]
- 645 36. Hunter DJ, Bierma-Zeinstra S. Osteoarthritis. *Lancet (London, England)* 2019;393(10182):1745-59. doi:  
646 10.1016/s0140-6736(19)30417-9 [published Online First: 2019/04/30]
- 647 37. Ferket BS, Feldman Z, Zhou J, et al. Impact of total knee replacement practice: cost effectiveness  
648 analysis of data from the Osteoarthritis Initiative. *Bmj* 2017;356:j1131. doi: 10.1136/bmj.j1131  
649 [published Online First: 2017/03/30]
- 650 38. Skou ST, Roos EM, Laursen MB, et al. A Randomized, Controlled Trial of Total Knee Replacement. *The*  
651 *New England journal of medicine* 2015;373(17):1597-606. doi: 10.1056/NEJMoa1505467 [published  
652 Online First: 2015/10/22]



1  
2  
3  
4  
5  
6  
7  
8  
9  
10  
11  
12  
13  
14  
15  
16  
17  
18  
19  
20  
21  
22  
23  
24  
25  
26  
27  
28  
29  
30  
31  
32  
33  
34  
35  
36  
37  
38  
39  
40  
41  
42  
43  
44  
45  
46  
47  
48  
49  
50  
51  
52  
53  
54  
55  
56  
57  
58  
59  
60

39. Svege I, Nordsletten L, Fernandes L, et al. Exercise therapy may postpone total hip replacement surgery in patients with hip osteoarthritis: a long-term follow-up of a randomised trial. *Ann Rheum Dis* 2015;74(1):164-9. doi: 10.1136/annrheumdis-2013-203628 [published Online First: 2013/11/21]
40. Skou ST, Roos EM, Laursen MB, et al. Total knee replacement and non-surgical treatment of knee osteoarthritis: 2-year outcome from two parallel randomized controlled trials. *Osteoarthritis and cartilage* 2018;26(9):1170-80. doi: 10.1016/j.joca.2018.04.014 [published Online First: 2018/05/04]
41. Fernandes L, Roos EM, Overgaard S, et al. Supervised neuromuscular exercise prior to hip and knee replacement: 12-month clinical effect and cost-utility analysis alongside a randomised controlled trial. *BMC Musculoskelet Disord* 2017;18(1):5. doi: 10.1186/s12891-016-1369-0 [published Online First: 2017/01/08]
42. Ilana N. Ackerman STS, Ewa M. Roos, Christian J. Barton, Joanne L. Kemp, Kay M. Crossley, Danny Liew, Zanfina Ademi. Implementing a national first-line management program for moderate-severe knee osteoarthritis in Australia: A budget impact analysis focusing on knee replacement avoidance. *Osteoarthritis and Cartilage Open* 2020 doi: <https://doi.org/10.1016/j.ocarto.2020.100070>
43. Juhl C, Christensen R, Roos EM, et al. Impact of exercise type and dose on pain and disability in knee osteoarthritis: a systematic review and meta-regression analysis of randomized controlled trials. *Arthritis & rheumatology (Hoboken, NJ)* 2014;66(3):622-36. doi: 10.1002/art.38290 [published Online First: 2014/02/28]
44. Moseng T, Dagfinrud H, Smedslund G, et al. The importance of dose in land-based supervised exercise for people with hip osteoarthritis. A systematic review and meta-analysis. *Osteoarthritis and cartilage* 2017;25(10):1563-76. doi: 10.1016/j.joca.2017.06.004 [published Online First: 2017/06/27]
45. Regnaud JP, Lefevre-Colau MM, Trinquart L, et al. High-intensity versus low-intensity physical activity or exercise in people with hip or knee osteoarthritis. *The Cochrane database of systematic reviews* 2015(10):Cd010203. doi: 10.1002/14651858.CD010203.pub2 [published Online First: 2015/10/30]

1  
2  
3  
4  
5  
6  
7  
8  
9  
10  
11  
12  
13  
14  
15  
16  
17  
18  
19  
20  
21  
22  
23  
24  
25  
26  
27  
28  
29  
30  
31  
32  
33  
34  
35  
36  
37  
38  
39  
40  
41  
42  
43  
44  
45  
46  
47  
48  
49  
50  
51  
52  
53  
54  
55  
56  
57  
58  
59  
60

- 678 46. Woods B, Revall P, Sculpher M, et al. Country-Level Cost-Effectiveness Thresholds: Initial Estimates and  
679 the Need for Further Research. *Value in health : the journal of the International Society for*  
680 *Pharmacoeconomics and Outcomes Research* 2016;19(8):929-35. doi: 10.1016/j.jval.2016.02.017  
681 [published Online First: 2016/12/19]
- 682 47. Pottegård A, Schmidt SAJ, Wallach-Kildemoes H, et al. Data Resource Profile: The Danish National  
683 Prescription Registry. *International journal of epidemiology* 2017;46(3):798-98f. doi:  
684 10.1093/ije/dyw213 [published Online First: 2016/10/30]
- 685 48. Schmidt M, Schmidt SA, Sandegaard JL, et al. The Danish National Patient Registry: a review of content,  
686 data quality, and research potential. *Clinical epidemiology* 2015;7:449-90. doi: 10.2147/cep.S91125  
687 [published Online First: 2015/11/26]
- 688 49. Christensen K, Doblhammer G, Rau R, et al. Ageing populations: the challenges ahead. *Lancet (London,*  
689 *England)* 2009;374(9696):1196-208. doi: 10.1016/s0140-6736(09)61460-4 [published Online First:  
690 2009/10/06]
- 691 50. Silva GS, Sullivan JK, Katz JN, et al. Long-term clinical and economic outcomes of a short-term physical  
692 activity program in knee osteoarthritis patients. *Osteoarthritis and cartilage* 2020;28(6):735-43.  
693 doi: 10.1016/j.joca.2020.01.017 [published Online First: 2020/03/15]

1  
2  
3  
4 **TABLE LEGENDS**  
5

6  
7  
8 695 Table 1. Baseline characteristics in knee and hip patients attending GLA:D®  
9

10  
11 697 Table 2. Adjusted public transfer payments one year prior to and one or three years following  
12  
13 698 GLA:D® for knee and hip patients  
14  
15

16 699 Table 3. Change in health-related quality of life from baseline to 12 months for knee and hip  
17  
18 700 patients attending GLA:D®  
19

20  
21 701 Table 4. Adjusted and raw estimated health care costs per QALY from baseline to 12 months for all  
22  
23 702 knee and hip patients attending GLA:D® and for knee and hip patients with high compliance  
24  
25

26  
27 703  
28  
29  
30  
31  
32  
33  
34  
35  
36  
37  
38  
39  
40  
41  
42  
43  
44  
45  
46  
47  
48  
49  
50  
51  
52  
53  
54  
55  
56  
57  
58  
59  
60

704 **Table 1. Baseline characteristics in knee and hip patients attending GLA:D®**

|                                                                     | <b>Knee<br/>(n: 12,162)</b> | <b>Hip<br/>(n: 4,093)</b> |
|---------------------------------------------------------------------|-----------------------------|---------------------------|
| <b>Age</b> (years), mean (SD)                                       | 64.1 (9.8)                  | 65.7 (9.4)                |
| <b>Gender</b> (Female), % (n)                                       | 73.1 (8,887)                | 73.6 (3,014)              |
| <b>BMI</b> (kg/m <sup>2</sup> ), mean (SD)                          | 28.6 (5.3)                  | 26.9 (4.6)                |
| <b>Marital status</b> , % (n)                                       |                             |                           |
| Married or living with others                                       | 72.4 (8,803)                | 70.7 (1,079)              |
| Single                                                              | 27.6 (3,359)                | 29.3 (1,200)              |
| <b>Ethnic background</b> , % (n)                                    |                             |                           |
| Danish                                                              | 96.2 (11,701)               | 96.8 (3,961)              |
| Other western                                                       | 2.5 (299)                   | 2.6 (106)                 |
| Not western                                                         | 1.3 (160)                   | 0.6 (25)                  |
| <b>Educational level</b> , % (n)                                    |                             |                           |
| Primary                                                             | 18.7 (2,277)                | 19.7 (1,493)              |
| Secondary                                                           | 3.0 (367)                   | 2.7 (112)                 |
| Vocational                                                          | 39.1 (4,761)                | 36.2 (1,481)              |
| Short-term                                                          | 4.6 (558)                   | 4.5 (185)                 |
| Bachelor                                                            | 26.2 (3,186)                | 28.0 (1,145)              |
| Long-term                                                           | 7.2 (873)                   | 8.0 (329)                 |
| Unknown                                                             | 1.2 (140)                   | 0.9 (35)                  |
| <b>Social status</b> , % (n)                                        |                             |                           |
| Employed                                                            | 43.3 (5,264)                | 36.5 (1,493)              |
| Unemployed                                                          | 2.1 (256)                   | 1.5 (61)                  |
| Sick pay (public funded)                                            | 0.7 (86)                    | 0.4 (15)                  |
| Disability pension                                                  | 3.7 (444)                   | 3.7 (152)                 |
| Early retirement                                                    | 6.3 (766)                   | 7.3 (297)                 |
| Age pension                                                         | 42.8 (5,209)                | 49.5 (2,028)              |
| Other                                                               | 1.1 (137)                   | 1.1 (47)                  |
| <b>Administrative region</b> , % (n)                                |                             |                           |
| Capital Region                                                      | 27.7 (3,367)                | 27.6 (1,131)              |
| Region Zealand                                                      | 13.0 (1,578)                | 13.1 (535)                |
| Region of Southern Denmark                                          | 21.8 (2,654)                | 25.2 (1,030)              |
| <b>Central Denmark Region</b>                                       | 25.4 (3,085)                | 24.9 (1,021)              |
| <b>North Denmark Region</b>                                         | 12.2 (1,478)                | 9.2 (376)                 |
| <b>Number of comorbidities</b> <sup>§</sup> , % (n)                 |                             |                           |
| 0                                                                   | 38.2 (4,367)                | 39.7 (1,533)              |
| 1                                                                   | 35.7 (4,076)                | 35.1 (1,358)              |
| 2                                                                   | 17.3 (1,979)                | 16.8 (649)                |
| 3 or more                                                           | 8.8 (1,006)                 | 8.4 (326)                 |
| <b>Symptom duration</b> (months), median (IQR)                      | 24 (7-60)                   | 24 (8-48)                 |
| <b>Pain intensity</b> (VAS 0-100, best to worst), mean (SD)         | 48.6 (22.0)                 | 47.6 (21.7)               |
| <b>Bilateral symptoms</b> , % (n)                                   | 46.3 (5,614)                | 26.1 (1,064)              |
| <b>Walk speed</b> <sup>#</sup> (m/sec), mean (SD)                   | 1.49 (0.33)                 | 1.49 (0.34)               |
| <b>Previous surgery in worst joint</b> <sup>&amp;</sup> , % (n)     | 30.7 (3,725)                | 4.0 (161)                 |
| <b>Use of pain medication</b> <sup>□</sup> (yes), % (n)             |                             |                           |
| Overall                                                             | 61.3 (7,431)                | 64.2 (2,629)              |
| Paracetamol                                                         | 49.9 (6,073)                | 53.3 (2,184)              |
| NSAIDs                                                              | 35.6 (4,325)                | 34.6 (1,419)              |
| Opioids                                                             | 7.1 (868)                   | 9.0 (367)                 |
| <b>KOOS/HOOS QOL</b> <sup>*</sup> (0-100, best to worst), mean (SD) | 45.2 (14.7)                 | 47.4 (15.1)               |

705 Missing values: BMI n: 5 (knee), n: 7 (hip); Number of comorbidities n: 711 (knee), n: 215 (hip); Symptom duration  
706 (mainly missing due to technical problems): n: 3,157 (knee), n: 1,096 (hip) ; Pain intensity: n:23 (knee), n:9 (hip) ;  
707 Bilateral symptoms: n:32 (knee), n:20 (hip) ; Walk speed: n:610 (knee), n:221 (hip); KOOS/HOOS QOL: n: 36 (knee),

1  
2  
3  
4  
5  
6  
7  
8  
9  
10  
11  
12  
13  
14  
15  
16  
17  
18  
19  
20  
21  
22  
23  
24  
25  
26  
27  
28  
29  
30  
31  
32  
33  
34  
35  
36  
37  
38  
39  
40  
41  
42  
43  
44  
45  
46  
47  
48  
49  
50  
51  
52  
53  
54  
55  
56  
57  
58  
59  
60

708 n: 21 (hip).

709 #Walking speed was assessed with the 40 m Fast-paces Walk Test under instruction of the GLA:D®-therapist

710 □Self-reported use of pain medication during last 3 months

711 %Number of comorbidities calculated from self-report of the following conditions: hypertension, cardiovascular  
712 diseases, lung diseases, diabetes, stomach diseases, liver- or kidney diseases, blood diseases, cancer, depression,  
713 rheumatoid arthritis, neurological disorders, other medical diseases

714 &Self-reported previous surgery in worst joint

715 \*Knee injury and Osteoarthritis Outcome Score or Hip disability or Osteoarthritis Outcome Score Quality Of Life sub-  
716 scale score

For peer review only

717 Table 2. Adjusted public transfer payments one year prior to and one or three years following GLA:D® for knee and hip patients

|                                  | One-year horizon                             |                       |         |                        |         |                      |                     | Three-year horizon                         |         |                      |         |                      |         |       |
|----------------------------------|----------------------------------------------|-----------------------|---------|------------------------|---------|----------------------|---------------------|--------------------------------------------|---------|----------------------|---------|----------------------|---------|-------|
|                                  | Pre-period (1 year)                          | Post-period (mth 1-3) |         | Post-period (mth 4-12) |         | Post-period (year 1) | Pre-period (1 year) | Post-period (year 1)                       |         | Post-period (year 2) |         | Post-period (year 3) |         |       |
|                                  | Weeks/month                                  | Weeks/month           | p-value | Weeks/month            | p-value | Weeks/month          | Weeks/year          | Weeks/year                                 | p-value | Weeks/year           | p-value | Weeks/year           | p-value |       |
|                                  | <b>Knee patients in workforce (n: 5,586)</b> |                       |         |                        |         |                      |                     | <b>Knee patients in workforce (n: 905)</b> |         |                      |         |                      |         |       |
| <b>Public transfer payments#</b> |                                              |                       |         |                        |         |                      |                     |                                            |         |                      |         |                      |         |       |
| Unemployed                       | 0.24                                         | 0.26                  | 0.000   | 0.27                   | 0.001   | 0.27                 | 0.000               | 3.50                                       | 3.82    | 0.344                | 3.51    | 0.986                | 3.32    | 0.703 |
| Sheltered employment             | 0.10                                         | 0.10                  | 0.959   | 0.10                   | 0.967   | 0.10                 | 0.982               | 1.61                                       | 1.59    | 0.907                | 1.69    | 0.671                | 1.78    | 0.422 |
| Sick pay                         | 0.13                                         | 0.16                  | 0.000   | 0.14                   | 0.164   | 0.15                 | 0.029               | 1.47                                       | 1.70    | 0.295                | 1.54    | 0.789                | 1.16    | 0.201 |
| Rehabilitation                   | 0.01                                         | 0.01                  | 0.254   | 0.01                   | 0.494   | 0.01                 | 0.407               | 0.09                                       | 0.03    | 0.017                | 0.09    | 0.960                | 0.06    | 0.731 |
| Education                        | 0.01                                         | 0.00                  | 0.136   | 0.01                   | 0.950   | 0.00                 | 0.770               | 0.20                                       | 0.18    | 0.507                | 0.23    | 0.690                | 0.20    | 0.991 |
| Disability pension               | 0.23                                         | 0.24                  | 0.006   | 0.23                   | 0.259   | 0.24                 | 0.136               | 6.02                                       | 6.02    | 0.969                | 5.91    | 0.467                | 6.00    | 0.966 |
| Early retirement                 | 0.37                                         | 0.46                  | 0.000   | 0.46                   | 0.000   | 0.46                 | 0.000               | 6.06                                       | 7.35    | 0.000                | 7.02    | 0.071                | 5.44    | 0.354 |
|                                  | <b>Hip patients in workforce (n: 1,543)</b>  |                       |         |                        |         |                      |                     | <b>Hip patients in workforce (n: 264)</b>  |         |                      |         |                      |         |       |
| <b>Public transfer payments§</b> |                                              |                       |         |                        |         |                      |                     |                                            |         |                      |         |                      |         |       |
| Unemployed                       | 0.19                                         | 0.19                  | 0.540   | 0.20                   | 0.309   | 0.20                 | 0.325               | 3.36                                       | 3.56    | 0.730                | 3.20    | 0.865                | 2.90    | 0.672 |
| Sheltered employment             | 0.10                                         | 0.10                  | 0.458   | 0.10                   | 0.516   | 0.10                 | 0.470               | 1.92                                       | 1.80    | 0.712                | 1.50    | 0.217                | 1.73    | 0.661 |
| Sick pay                         | 0.10                                         | 0.13                  | 0.082   | 0.16                   | 0.001   | 0.15                 | 0.003               | 1.38                                       | 2.00    | 0.327                | 1.41    | 0.967                | 1.32    | 0.903 |
| Rehabilitation                   | 0.00                                         | 0.01                  | 0.202   | 0.00                   | 0.407   | 0.00                 | 0.812               | 0.04                                       | 0.06    | 0.000                | 0.19    | 0.000                | 0.41    | 0.000 |
| Education                        | 0.01                                         | 0.01                  | 0.321   | 0.01                   | 0.659   | 0.01                 | 0.557               | 0.27                                       | 0.20    | 0.593                | 0.20    | 0.598                | 0.12    | 0.183 |
| Disability pension               | 0.29                                         | 0.26                  | 0.264   | 0.27                   | 0.502   | 0.27                 | 0.427               | 3.81                                       | 3.92    | 0.501                | 3.66    | 0.673                | 3.29    | 0.171 |
| Early retirement                 | 0.47                                         | 0.59                  | 0.000   | 0.58                   | 0.000   | 0.58                 | 0.000               | 9.02                                       | 11.54   | 0.000                | 10.01   | 0.422                | 7.11    | 0.219 |

718 #Adjusted weeks receiving public transfer payments in one-year horizon for women, 55 years, married/co-living, Danish ethnicity, low education and living in the  
719 Capital Region estimated using a generalized estimating equation gamma regression model for repeated measures including sex, age, marital status, ethnicity,  
720 education and region as covariates. Because of no convergence in the model following covariates were omitted: ‘Early retirement’: sex, marital status, ethnicity,  
721 education and region; ‘Rehabilitation’: age, marital status, ethnicity and education; ‘Education’: age, marital status, ethnicity and education. Adjusted weeks receiving  
722 public transfer payments in three-year horizon for women, 55 years and low education estimated using a generalized estimating equation gamma regression model for  
723 repeated measures including sex, age and education as covariates. Because of no convergence in the model following covariates were omitted: ‘Sheltered  
724 employment’: sex and education; ‘Disability pension’: sex and education; ‘Early retirement’: age.  
725 §Adjusted weeks receiving public transfer payments in one-year horizon for women, 55 years, married/co-living, Danish ethnicity, low education and living in the  
726 Capital Region estimated using a generalized estimating equation gamma regression model for repeated measures including sex, age, marital status, ethnicity,  
727 education and region as covariates. Because of no convergence in the model following covariates were omitted: ‘Early retirement’: sex, marital status, ethnicity,  
728 education and region; ‘Rehabilitation’: age, marital status, ethnicity, education and region; ‘Education’: age, marital status, ethnicity, education and region. Adjusted  
729 weeks receiving public transfer payments in three-year horizon for women, 55 years and low education estimated using a generalized estimating equation gamma  
730 regression model for repeated measures including sex, age and education as covariates. Because of no convergence in the model following covariates were omitted:

1  
2 731 'Sheltered employment': sex and education; Disability pension'': sex and education; 'Early retirement': age; 'Rehabilitation': sex, age and education; 'Rehabilitation:  
3 732 sex, age and education.  
4  
5  
6  
7  
8  
9  
10  
11  
12  
13  
14  
15  
16  
17  
18  
19  
20  
21  
22  
23  
24  
25  
26  
27  
28  
29  
30  
31  
32  
33  
34  
35  
36  
37  
38  
39  
40  
41  
42  
43  
44  
45  
46

For peer review only

1  
2  
3  
4  
5  
6  
7  
8  
9  
10  
11  
12  
13  
14  
15  
16  
17  
18  
19  
20  
21  
22  
23  
24  
25  
26  
27  
28  
29  
30  
31  
32  
33  
34  
35  
36  
37  
38  
39  
40  
41  
42  
43  
44  
45  
46  
47  
48  
49  
50  
51  
52  
53  
54  
55  
56  
57  
58  
59  
60

733 **Table 3. Change in health-related quality of life from baseline to 12 months for knee and hip**  
734 **patients attending GLA:D®**

|             | Knee (n: 12,162)                          |                                |                                 |                                               | Hip (n: 4,093)                            |                                |                                 |                                               |
|-------------|-------------------------------------------|--------------------------------|---------------------------------|-----------------------------------------------|-------------------------------------------|--------------------------------|---------------------------------|-----------------------------------------------|
|             | Pre period<br>QALY<br>(Baseline<br>EQ-5D) | 3 months<br>EQ-5D <sup>§</sup> | 12 months<br>EQ-5D <sup>§</sup> | Composite<br>post period<br>QALY <sup>#</sup> | Pre period<br>QALY<br>(Baseline<br>EQ-5D) | 3 months<br>EQ-5D <sup>§</sup> | 12 months<br>EQ-5D <sup>§</sup> | Composite<br>post period<br>QALY <sup>#</sup> |
| <b>Mean</b> | 0.711                                     | 0.752                          | 0.756                           | 0.748                                         | 0.705                                     | 0.733                          | 0.747                           | 0.735                                         |
| <b>SD</b>   | 0.113                                     | 0.121                          | 0.134                           | 0.107                                         | 0.110                                     | 0.127                          | 0.144                           | 0.108                                         |

735 <sup>§</sup>Missing observations for EQ-5D at 3 and 12 months were imputed by Multiple Imputations

736 <sup>#</sup>One year post period QALY was calculated as the area under the curve taking both 3- and 12-months measurements  
737 into account

For peer review only



**Table 4. Adjusted and raw estimated health care costs per QALY from baseline to 12 months for all knee and hip patients attending GLA:D<sup>®</sup> and for knee and hip patients with high compliance**

|                                    | Knee                                      |                                                |                                      | Hip                                       |                                                |                                      |
|------------------------------------|-------------------------------------------|------------------------------------------------|--------------------------------------|-------------------------------------------|------------------------------------------------|--------------------------------------|
|                                    | Change in health care costs (€) (95 % CI) | Change in EQ-5D (QALYs) (95 % CI) <sup>§</sup> | Euro pr. QALY (95 % CI) <sup>§</sup> | Change in health care costs (€) (95 % CI) | Change in EQ-5D (QALYs) (95 % CI) <sup>§</sup> | Euro pr. QALY (95 % CI) <sup>§</sup> |
| <b>Adjusted<sup>#</sup></b>        | 298<br>(206-419)                          | 0.035<br>(0.033-0.037)                         | 8,497<br>(6,242-11,324)              | 640<br>(400-1,009)                        | 0.028<br>(0.025-0.032)                         | 22,568<br>(16,000-31,531)            |
| <b>Unadjusted</b>                  | 895<br>(719-1,088)                        | 0.037                                          | 24,236                               | 2,162<br>(1,723-2,671)                    | 0.030                                          | 71,478                               |
| <b>High compliance<sup>#</sup></b> | 197<br>(91-360)                           | 0.036<br>(0.033-0.039)                         | 5,438<br>(2,758-9,231)               | 492<br>(241-969)                          | 0.028<br>(0.024-0.033)                         | 17,330<br>(10,041-29,364)            |

<sup>§</sup>Confidence Interval not generated from the MI

<sup>#</sup>Adjusted for age, gender, marital status, ethnicity, educational level and region

<sup>□</sup>High compliance group defined as patients attending minimum 10 supervised exercise sessions

1  
2  
3  
4  
5  
6  
7  
8  
9  
10  
11  
12  
13  
14  
15  
16  
17  
18  
19  
20  
21  
22  
23  
24  
25  
26  
27  
28  
29  
30  
31  
32  
33  
34  
35  
36  
37  
38  
39  
40  
41  
42  
43  
44  
45  
46  
47  
48  
49  
50  
51  
52  
53  
54  
55  
56  
57  
58  
59  
60

745 **FIGURE LEGENDS**

746 Figure 1. Flow chart

747 Figure 2. Adjusted healthcare costs and home care costs one year prior to and up to three years  
748 following GLA:D® for knee and hip patients

For peer review only

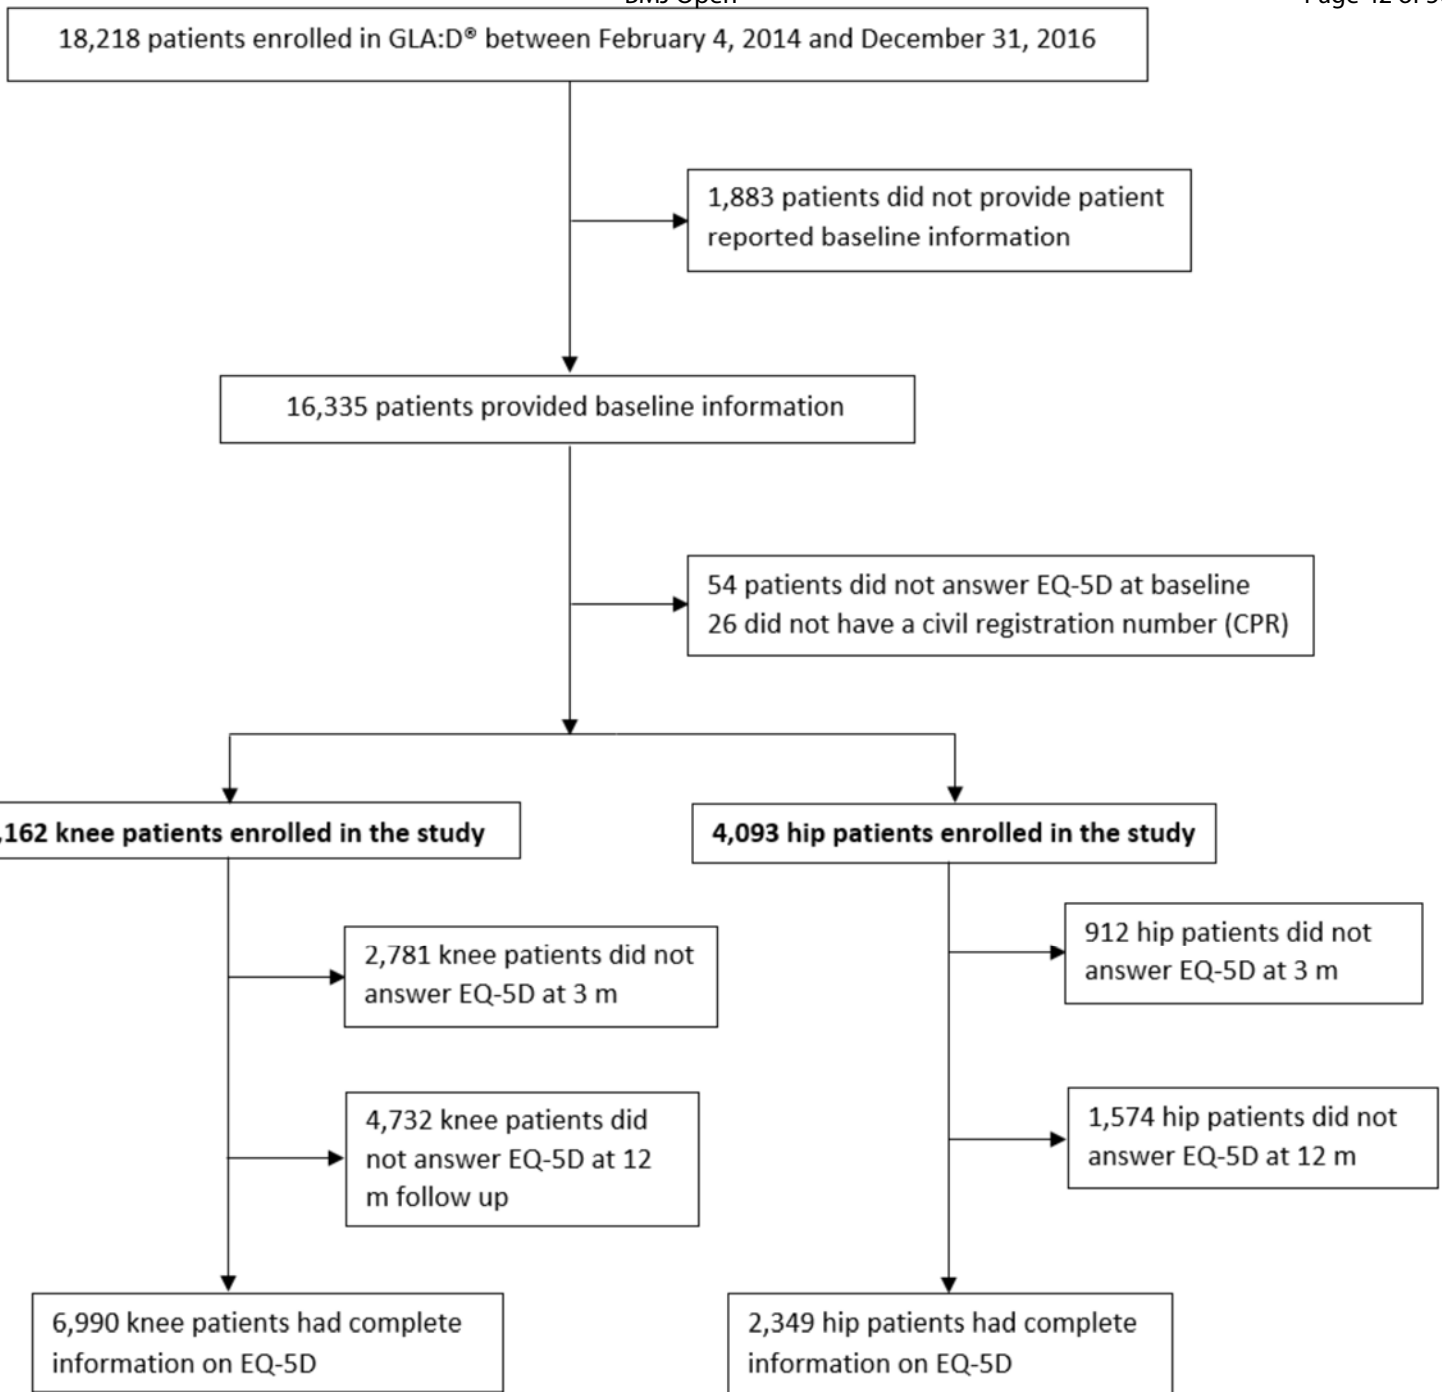

a) Adjusted health care costs/year - total

BMJ Open

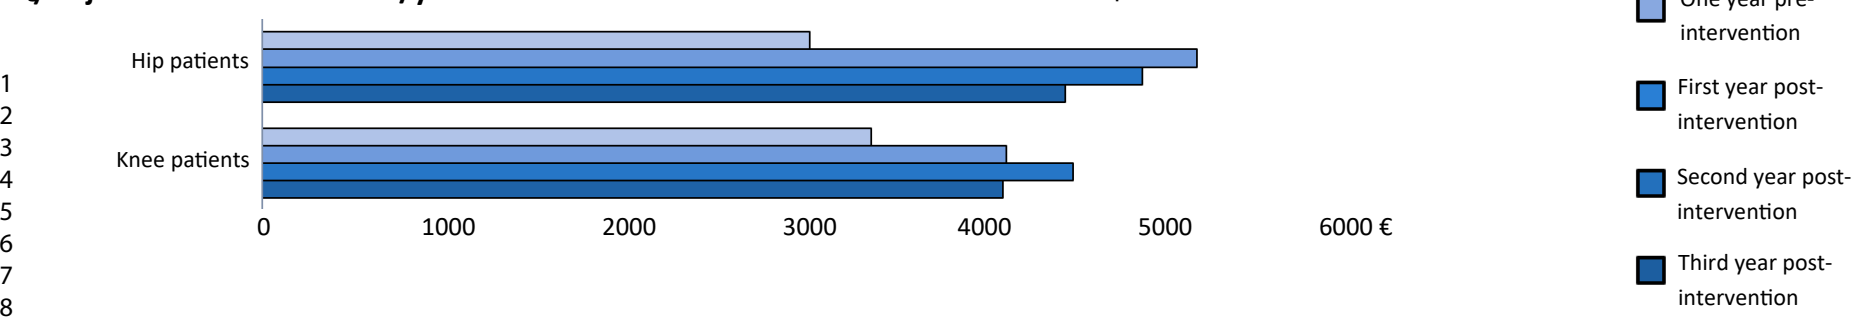

b) Adjusted health care costs/year - knee patients

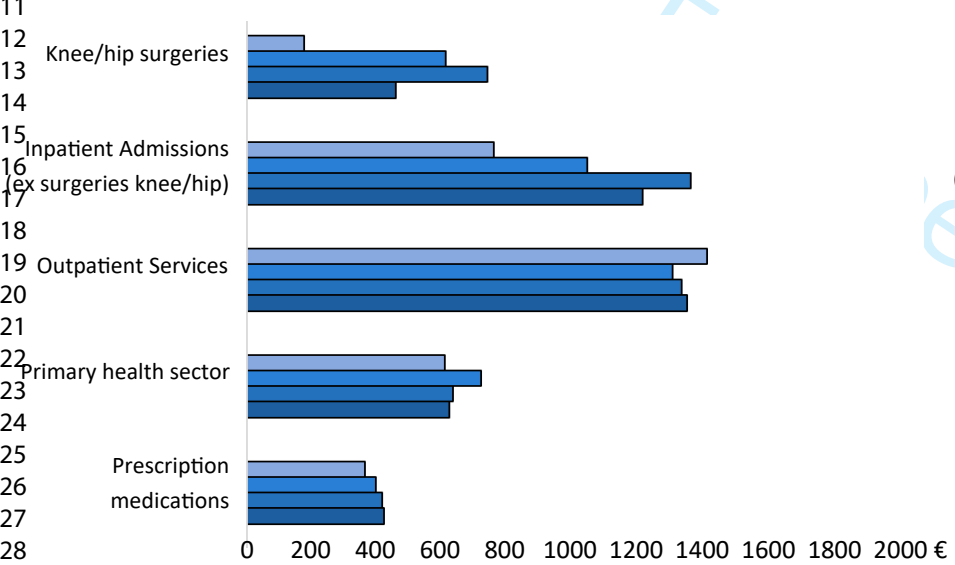

c) Adjusted health care costs/year - hip patients

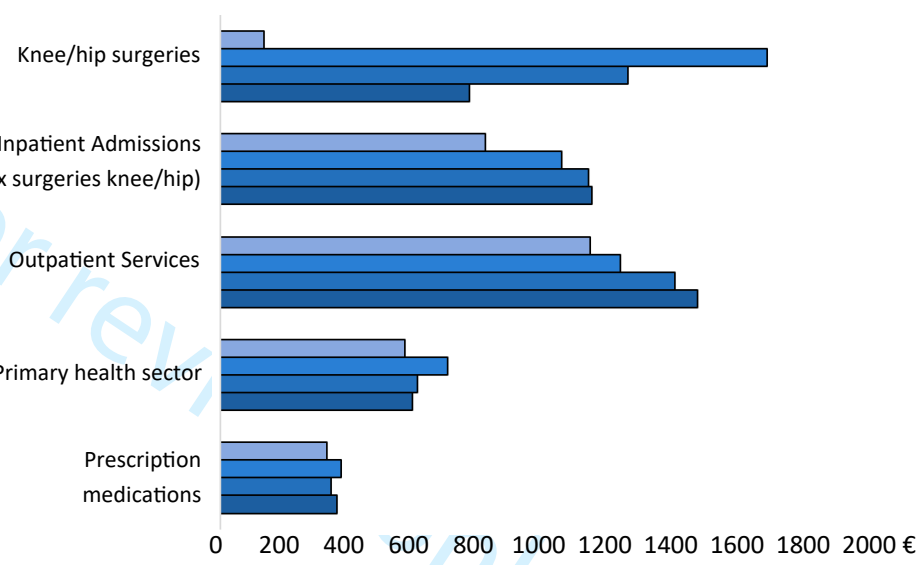

d) Adjusted costs/year home care - knee patients

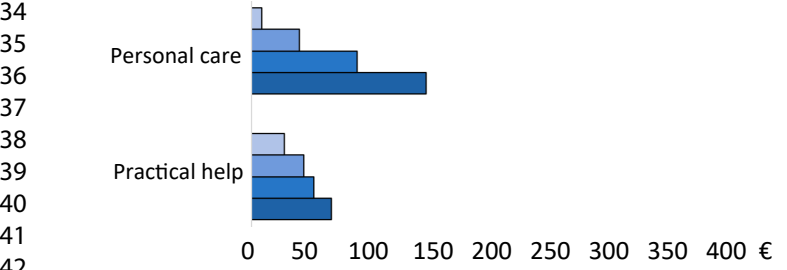

e) Adjusted costs/year home care - hip patients

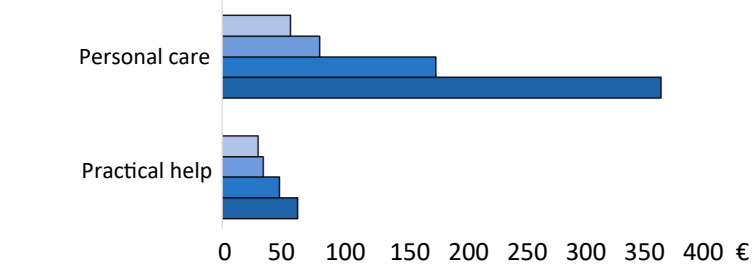

# Supplementary Appendix

Figure S1: Illustration of how quality of life was calculated the year pre- and post-intervention

Table S1: Baseline characteristics in patients with complete information and patients with loss to follow up

Table S2: Mean public transfer payments one year prior to and one or three years following GLA:D<sup>®</sup> for knee and hip patients

Table S3: Mean health care costs and home care costs one year prior to and one or three years following GLA:D<sup>®</sup> for knee and hip patients

Table S4: Adjusted health care costs and home care costs one year prior to and one or three years following GLA:D<sup>®</sup> for knee and hip patients

Table S5. Sensitivity analysis - adjusted estimated health care cost per QALY from baseline to 12 months for knee and hip patients attending GLA:D<sup>®</sup> in private clinics, municipal clinics and patients with complete information

15 **Figure S1: Illustration of how quality of life was calculated the year pre and post intervention**

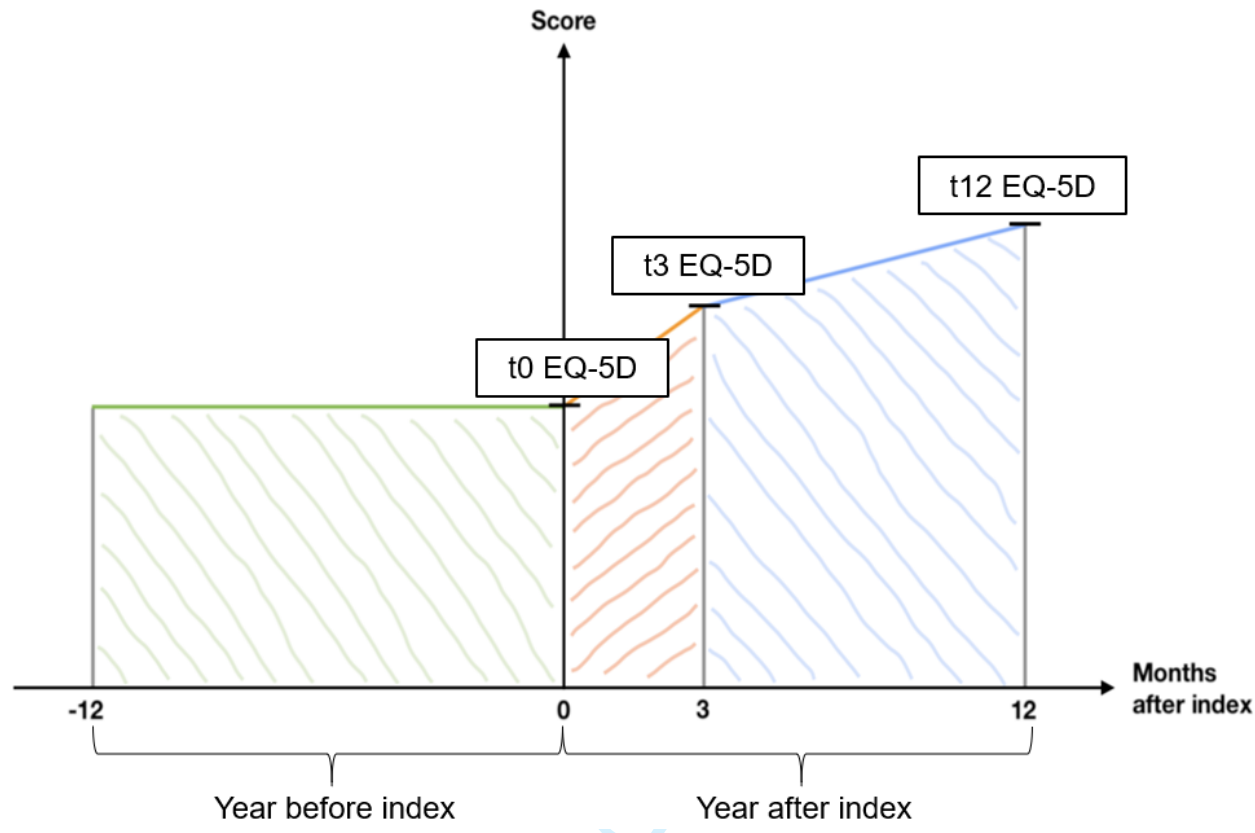

16

17 **Table S1: Baseline characteristics in patients with complete information and patients who had**  
 18 **incomplete information**

|                                                             | Complete information |                   | Incomplete information |                   |
|-------------------------------------------------------------|----------------------|-------------------|------------------------|-------------------|
|                                                             | Knee<br>(n: 6,990)   | Hip<br>(n: 2,349) | Knee<br>(n: 5,173)     | Hip<br>(n: 1,749) |
| Age (years), mean (SD)                                      | 64.4 (9.1)           | 65.7 (8.7)        | 63.7 (10.7)            | 65.7 (10.3)       |
| Gender (Female), % (n)                                      | 73.2 (5,113)         | 74.6 (1,753)      | 73.0 (3,777)           | 72.2 (1,263)      |
| BMI (kg/m <sup>2</sup> ), mean (SD)                         | 28.4 (5.2)           | 26.6 (4.4)        | 28.9 (5.4)             | 27.2 (4.9)        |
| <b>Marital status, % (n)</b>                                |                      |                   |                        |                   |
| Married or living with others                               | 75 (5,256)           | 73 (1,714)        | 69 (3,547)             | 68 (1,179)        |
| Single                                                      | 25 (1,730)           | 27 (634)          | 31 (1,629)             | 32 (566)          |
| <b>Ethnic background, % (n)</b>                             |                      |                   |                        |                   |
| Danish                                                      | 97 (6,773)           | 97 (2,276)        | 95 (4,928)             | 97 (1,685)        |
| Other western                                               | 2 (160)              | 3 (60)            | 3 (139)                | 3 (46)            |
| Not western                                                 | 1 (53)               | 0.5 (11)          | 2 (107)                | 0.8 (14)          |
| <b>Educational level, % (n)</b>                             |                      |                   |                        |                   |
| Primary                                                     | 17 (1,177)           | 18 (420)          | 21 (1,100)             | 22 (386)          |
| Secondary                                                   | 3 (197)              | 3 (69)            | 3 (170)                | 2 (43)            |
| Vocational                                                  | 38 (2,671)           | 34 (792)          | 40 (2,090)             | 39 (689)          |
| Short-term                                                  | 5 (322)              | 5 (123)           | 5 (236)                | 4 (62)            |
| Bachelor                                                    | 28 (1,999)           | 31 (722)          | 31 (1,187)             | 24 (423)          |
| Long-term                                                   | 8 (546)              | 9 (200)           | 9 (327)                | 7 (129)           |
| Unknown                                                     | 1 (74)               | 1 (22)            | 1 (66)                 | 1 (13)            |
| <b>Social status, % (n)</b>                                 |                      |                   |                        |                   |
| Employed                                                    | 44 (3,012)           | 37 (866)          | 44 (2,252)             | 37 (627)          |
| Unemployed                                                  | 0.5 (35)             | 0.3 (6)           | 0.8 (42)               | 0.4 (7)           |
| Sick pay (public funded)                                    | 0.5 (37)             | 0.4 (9)           | 1 (49)                 | 0.3 (6)           |
| Disability pension                                          | 3 (228)              | 3 (76)            | 4 (216)                | 4 (76)            |
| Early retirement                                            | 8 (527)              | 9 (2025)          | 5 (239)                | 6 (95)            |
| Age pension                                                 | 43 (3,006)           | 49 (1,137)        | 43 (2,203)             | 52 (891)          |
| Other                                                       | 1 (69)               | 1 (33)            | 1 (68)                 | 0.8 (14)          |
| <b>Sick leave<sup>1</sup>, % (n)</b>                        | 4.9 (314)            | 3.2 (77)          | 6.8 (353)              | 3.8 (67)          |
| <b>Administrative region, % (n)</b>                         |                      |                   |                        |                   |
| Capital Region                                              | 27 (1,875)           | 26 (606)          | 29 (1,492)             | 30 (525)          |
| Region Zealand                                              | 13 (936)             | 14 (327)          | 12 (642)               | 12 (208)          |
| Region of Southern Denmark                                  | 23 (1,579)           | 26 (602)          | 21 (1,075)             | 25 (428)          |
| Central Denmark Region                                      | 26 (1,796)           | 26 (609)          | 25 (1,275)             | 24 (412)          |
| North Denmark Region                                        | 11 (800)             | 9 (204)           | 13 (1,289)             | 10 (172)          |
| <b>Number of comorbidities<sup>2</sup>, % (n)</b>           |                      |                   |                        |                   |
| 0                                                           | 39.2 (2,575)         | 41.9 (928)        | 36.9 (1,798)           | 36.5 (608)        |
| 1                                                           | 36.2 (2,381)         | 35.5 (787)        | 35.0 (1,704)           | 34.7 (578)        |
| 2                                                           | 17.0 (1,118)         | 15.8 (350)        | 17.8 (867)             | 18.1 (302)        |
| 3 or more                                                   | 7.7 (504)            | 6.9 (152)         | 10.4 (505)             | 10.7 (178)        |
| <b>Symptom duration (months), median (IQR)</b>              | 24 (7-60)            | 24 (8-48)         | 24 (7-60)              | 24 (8-48)         |
| <b>Pain intensity (VAS 0-100, best to worst), mean (SD)</b> | 47.3 (21.8)          | 45.9 (21.4)       | 50.3 (22.3)            | 49.7 (22.0)       |
| <b>Bilateral symptoms, % (n)</b>                            | 46.7 (3,259)         | 26.6 (622)        | 45.7 (2,355)           | 25.4 (442)        |
| <b>Walk speed<sup>#</sup> (m/sec), mean (SD)</b>            | 1.51 (0.32)          | 1.52 (0.33)       | 1.46 (0.35)            | 1.45 (0.35)       |

1  
2  
3  
4  
5  
6  
7  
8  
9  
10  
11  
12  
13  
14  
15  
16  
17  
18  
19  
20  
21  
22  
23  
24  
25  
26  
27  
28  
29  
30  
31  
32  
33  
34  
35  
36  
37  
38  
39  
40  
41  
42  
43  
44  
45  
46  
47  
48  
49  
50  
51  
52  
53  
54  
55  
56  
57  
58  
59  
60

|                                                                    |              |              |               |              |
|--------------------------------------------------------------------|--------------|--------------|---------------|--------------|
| <b>Previous surgery in worst joint<sup>&amp;</sup>, % (n)</b>      | 30.2 (2,112) | 3.2 (78)     | 31.3 (1,619)  | 4.8 (84)     |
| <b>Receive home care, % (n)</b>                                    | 8.9 (621)    | 9.6 (224)    | 11.5 (593)    | 12.4 (215)   |
| <b>Use of pain medication<sup>o</sup> (yes), % (n)</b>             |              |              |               |              |
| Overall                                                            | 60.9 (4,256) | 62.7 (1,473) | 61.8 (3,196)  | 66.1 (1,156) |
| Paracetamol                                                        | 49.5 (3,463) | 52.9 (1,243) | 50.5 (2,610)  | 53.8 (941)   |
| NSAIDs                                                             | 35.8 (2,504) | 32.5 (764)   | 35.2 (1,1821) | 37.5 (655)   |
| Opioids                                                            | 6.6 (459)    | 8.1 (190)    | 7.9 (409)     | 10.1 (177)   |
| <b>KOOS/HOOS QOL<sup>*</sup> (0-100, best to worst), mean (SD)</b> | 46.0 (14.5)  | 47.9 (15.0)  | 44.1 (15.0)   | 46.7 (15.3)  |

Missing values: BMI: n: 2 (knee, complete), n: 5 (hip, complete), n: 3 (knee, incomplete), n: 2 (hip, incomplete); Ethnic background: n: 1 (hip, complete), n: 2 (knee, incomplete); Social status: n: 72 (knee, complete), n: 19 (hip, complete), n: 107 (knee, incomplete), n: 29 (hip, incomplete); Sick leave: n: 6 (knee, complete), n: 1 (hip, complete), n: 19 (knee, incomplete), n: 3 (hip, incomplete); Number of comorbidities: n: 412 (knee, complete), n: 132 (hip, complete), n: 299 (knee, incomplete), n: 83 (hip, incomplete); Symptom duration (mainly missing due to technical problems): n: 1.730 (knee, complete), n: 595 (hip, complete), n: 1.427 (knee, incomplete), n: 501 (hip, incomplete); Pain intensity: n: 8 (knee, complete), n: 3 (hip, complete), n: 15 (knee, incomplete), n: 6 (hip, incomplete); Bilateral symptoms: n: 14 (knee, complete), n: 10 (hip, complete), n: 18 (knee, incomplete), n: 10 (hip, incomplete); Walk speed: n: 309 (knee, complete), n: 100 (hip, complete), n: 301 (knee, incomplete), n: 121 (hip, incomplete); Receive home care: n: 31 (knee, complete), n: 8 (hip, complete), n: 36 (knee, incomplete), n: 8 (hip, incomplete); KOOS/HOOS QOL: n: 17 (knee, complete), n: 9 (hip, complete), n: 19 (knee, incomplete), n: 10 (hip, incomplete).

<sup>#</sup>Walking speed was assessed with the 40 m Fast-paces Walk Test under instruction of the GLA:D<sup>®</sup>-therapist

<sup>o</sup>Self-reported use of pain medication during last 3 months

<sup>l</sup>Self-reported sick leave for more than 1 month during last year due to knee/hip

<sup>%</sup>Number of comorbidities calculated from self-report of the following conditions: hypertension, cardiovascular diseases, lung diseases, diabetes, stomach diseases, liver- or kidney diseases, blood diseases, cancer, depression, rheumatoid arthritis, neurological disorders, other medical diseases

<sup>&</sup>Self-reported previous surgery in worst joint

<sup>\*</sup>Knee injury and Osteoarthritis Outcome Score or Hip disability or Osteoarthritis Outcome Score Quality Of Life sub-scale score



35 **Table S2. Mean public transfer payments one year prior to and one or three years following GLA:D® for knee and hip patients**

|                                 | One-year horizon                             |             |                       |             |                        |             |                      |             | Three-year horizon                         |            |                      |         |                      |         |                      |         |  |
|---------------------------------|----------------------------------------------|-------------|-----------------------|-------------|------------------------|-------------|----------------------|-------------|--------------------------------------------|------------|----------------------|---------|----------------------|---------|----------------------|---------|--|
|                                 | Pre-period (1 year)                          |             | Post-period (mth 1-3) |             | Post-period (mth 4-12) |             | Post-period (1 year) |             | Pre-period (1 year)                        |            | Post-period (year 1) |         | Post-period (year 2) |         | Post-period (year 3) |         |  |
|                                 | Weeks/month                                  | Weeks/month | p-value               | Weeks/month | p-value                | Weeks/month | p-value              | Weeks/month | p-value                                    | Weeks/year | Weeks/year           | p-value | Weeks/year           | p-value | Weeks/year           | p-value |  |
|                                 | <b>Knee patients in workforce (n: 5,586)</b> |             |                       |             |                        |             |                      |             | <b>Knee patients in workforce (n: 905)</b> |            |                      |         |                      |         |                      |         |  |
| <b>Public transfer payments</b> |                                              |             |                       |             |                        |             |                      |             |                                            |            |                      |         |                      |         |                      |         |  |
| Unemployed                      | 0.26                                         | 0.29        | 0.465                 | 0.30        | 0.104                  | 0.29        | 0.148                |             | 2.93                                       | 3.23       | 0.996                | 3.03    | 1.000                | 2.91    | 1.000                |         |  |
| Sheltered employment            | 0.17                                         | 0.16        | 1.000                 | 0.16        | 1.000                  | 0.16        | 1.000                |             | 1.48                                       | 1.52       | 1.000                | 1.61    | 1.000                | 1.68    | 0.999                |         |  |
| Sick pay                        | 0.14                                         | 0.19        | 0.000                 | 0.16        | 0.807                  | 0.17        | 0.159                |             | 1.55                                       | 1.88       | 0.830                | 1.64    | 1.000                | 1.24    | 0.798                |         |  |
| Rehabilitation                  | 0.01                                         | 0.01        | 0.998                 | 0.01        | 1.000                  | 0.01        | 0.999                |             | 0.09                                       | 0.03       | 0.964                | 0.09    | 1.000                | 0.06    | 1.000                |         |  |
| Education                       | 0.01                                         | 0.01        | 1.000                 | 0.01        | 1.000                  | 0.01        | 1.000                |             | 0.20                                       | 0.18       | 1.000                | 0.23    | 1.000                | 0.20    | 1.000                |         |  |
| Disability pension              | 0.29                                         | 0.30        | 1.000                 | 0.29        | 1.000                  | 0.30        | 1.000                |             | 3.51                                       | 3.53       | 1.000                | 3.20    | 0.000                | 2.93    | 0.939                |         |  |
| Early retirement                | 0.37                                         | 0.46        | 0.001                 | 0.46        | 0.002                  | 0.46        | 0.001                |             | 5.58                                       | 6.73       | 0.598                | 6.36    | 0.907                | 4.89    | 0.935                |         |  |
|                                 | <b>Hip patients in workforce (n: 1,543)</b>  |             |                       |             |                        |             |                      |             | <b>Hip patients in workforce (n: 264)</b>  |            |                      |         |                      |         |                      |         |  |
| <b>Public transfer payments</b> |                                              |             |                       |             |                        |             |                      |             |                                            |            |                      |         |                      |         |                      |         |  |
| Unemployed                      | 0.22                                         | 0.23        | 1.000                 | 0.24        | 0.998                  | 0.23        | 0.999                |             | 2.28                                       | 2.57       | 1.000                | 2.30    | 1.000                | 1.80    | 0.995                |         |  |
| Sheltered employment            | 0.16                                         | 0.16        | 1.000                 | 0.16        | 1.000                  | 0.16        | 1.000                |             | 1.72                                       | 1.72       | 1.000                | 1.50    | 1.000                | 1.78    | 1.000                |         |  |
| Sick pay                        | 0.10                                         | 0.14        | 0.202                 | 0.16        | 0.006                  | 0.15        | 0.009                |             | 1.35                                       | 1.85       | 0.963                | 1.72    | 0.992                | 1.48    | 1.000                |         |  |
| Rehabilitation                  | 0.00                                         | 0.01        | 0.996                 | 0.00        | 1.000                  | 0.00        | 1.000                |             | 0.04                                       | 0.06       | 1.000                | 0.19    | 0.986                | 0.41    | 0.622                |         |  |
| Education                       | 0.01                                         | 0.01        | 1.000                 | 0.01        | 1.000                  | 0.01        | 1.000                |             | 0.27                                       | 0.20       | 1.000                | 0.20    | 1.000                | 0.12    | 0.997                |         |  |
| Disability pension              | 0.37                                         | 0.37        | 1.000                 | 0.37        | 1.000                  | 0.37        | 1.000                |             | 4.34                                       | 4.45       | 1.000                | 3.98    | 1.000                | 3.47    | 0.991                |         |  |
| Early retirement                | 0.45                                         | 0.56        | 0.128                 | 0.56        | 0.129                  | 0.56        | 0.126                |             | 7.73                                       | 9.78       | 0.810                | 8.59    | 0.999                | 6.08    | 0.876                |         |  |

36

Review only

37 Table S3. Mean health care costs and home care costs one year prior to and one or three years following GLA:D® for knee and hip patients

|                                       | Pre-period<br>(1 year) | Post-period<br>(mth 1-3) |         | Post-period<br>(mth 4-12) |         | Post-period<br>(1 year) |         | Pre-period<br>(1 year) | Post-period<br>(year 1) |         | Post-period<br>(year 2) |         | Post-period<br>(year 3) |         |  |
|---------------------------------------|------------------------|--------------------------|---------|---------------------------|---------|-------------------------|---------|------------------------|-------------------------|---------|-------------------------|---------|-------------------------|---------|--|
|                                       | Cost<br>(€/month)      | Cost<br>(€/month)        | p-value | Cost<br>(€/month)         | p-value | Cost<br>(€/month)       | p-value | Cost<br>(€/Year)       | Cost<br>(€/year)        | p-value | Cost<br>(€/year)        | p-value | Cost<br>(€/year)        | p-value |  |
| <b>Knee (n: 12,162)</b>               |                        |                          |         |                           |         |                         |         | <b>Knee (n: 1,879)</b> |                         |         |                         |         |                         |         |  |
| <b>Health costs (somatic)</b>         |                        |                          |         |                           |         |                         |         |                        |                         |         |                         |         |                         |         |  |
| <b>Inpatient Admissions total</b>     | <b>73.1</b>            | <b>67.7</b>              | 0.999   | <b>170.6</b>              | 0.000   | <b>144.8</b>            | 0.000   | <b>962.1</b>           | <b>1,785.3</b>          | 0.000   | <b>2,086.1</b>          | 0.000   | <b>1,729.7</b>          | 0.000   |  |
| Thereof inpatient                     |                        |                          |         |                           |         |                         |         |                        |                         |         |                         |         |                         |         |  |
| Surgery knee/hip                      | 9.6                    | 17.9                     | 0.004   | 67.7                      | 0.000   | 55.2                    | 0.000   | 160.0                  | 618.4                   | 0.000   | 681.6                   | 0.000   | 428.7                   | 0.000   |  |
| Surgery other                         | 11.3                   | 4.9                      | 0.000   | 14.1                      | 0.596   | 11.8                    | 1.000   | 151.3                  | 225.5                   | 0.866   | 198.8                   | 0.995   | 290.1                   | 1.000   |  |
| <b>Outpatient Services total</b>      | <b>108.4</b>           | <b>90.3</b>              | 0.000   | <b>107.4</b>              | 1.000   | <b>103.1</b>            | 0.764   | <b>1,421.0</b>         | <b>1,345.1</b>          | 1.000   | <b>1,359.0</b>          | 1.000   | <b>1,372.1</b>          | 0.771   |  |
| Thereof outpatient                    |                        |                          |         |                           |         |                         |         |                        |                         |         |                         |         |                         |         |  |
| Surgery knee/hip                      | 4.3                    | 1.2                      | 0.000   | 1.7                       | 0.000   | 1.6                     | 0.000   | 74.9                   | 16.9                    | 0.000   | 10.0                    | 0.000   | 6.0                     | 0.000   |  |
| Surgery other                         | 1.9                    | 1.8                      | 1.000   | 1.8                       | 1.000   | 1.8                     | 1.000   | 23.4                   | 15.5                    | 0.998   | 24.4                    | 1.000   | 32.1                    | 1.000   |  |
| <b>Primary health sector total</b>    | <b>48.9</b>            | <b>75.5</b>              | 0.000   | <b>49.6</b>               | 0.963   | <b>56.1</b>             | 0.000   | <b>562.7</b>           | <b>669.7</b>            | 0.000   | <b>593.8</b>            | 0.614   | <b>581.8</b>            | 0.000   |  |
| Thereof primary                       |                        |                          |         |                           |         |                         |         |                        |                         |         |                         |         |                         |         |  |
| Physiotherapy                         | 5.2                    | 33.7                     | 0.000   | 7.7                       | 0.000   | 14.2                    | 0.000   | 66.2                   | 175.4                   | 0.000   | 68.5                    | 1.000   | 60.8                    | 0.000   |  |
| Chiropractic                          | 0.5                    | 0.5                      | 1.000   | 0.5                       | 0.768   | 0.5                     | 0.946   | 6.2                    | 6.9                     | 0.999   | 6.0                     | 1.000   | 5.7                     | 0.942   |  |
| General practitioner                  | 18.5                   | 16.7                     | 0.000   | 17.5                      | 0.000   | 17.3                    | 0.000   | 215.8                  | 206.4                   | 0.783   | 222.9                   | 0.977   | 221.1                   | 0.000   |  |
| Other primary                         | 24.7                   | 24.5                     | 1.000   | 23.9                      | 0.560   | 24.0                    | 0.816   | 274.6                  | 281.0                   | 1.000   | 296.3                   | 0.809   | 294.2                   | 0.818   |  |
| <b>Prescription medications total</b> | <b>28.8</b>            | <b>29.5</b>              | 0.998   | <b>29.9</b>               | 0.873   | <b>29.8</b>             | 0.943   | <b>314.5</b>           | <b>346.9</b>            | 0.782   | <b>367.7</b>            | 0.161   | <b>372.8</b>            | 0.938   |  |
| Thereof prescription                  |                        |                          |         |                           |         |                         |         |                        |                         |         |                         |         |                         |         |  |
| Painkiller medications                | 3.4                    | 3.6                      | 1.000   | 3.8                       | 0.985   | 3.7                     | 0.995   | 34.8                   | 38.4                    | 0.940   | 40.2                    | 0.616   | 39.3                    | 0.996   |  |
| Not painkiller medications            | 25.4                   | 25.9                     | 1.000   | 26.2                      | 0.982   | 26.1                    | 0.993   | 279.8                  | 308.5                   | 0.869   | 327.5                   | 0.252   | 333.5                   | 0.994   |  |
| <b>Health costs total (somatic)</b>   | <b>259.2</b>           | <b>263.0</b>             | 1.000   | <b>357.6</b>              | 0.000   | <b>333.8</b>            | 0.000   | <b>3,260.3</b>         | <b>4,147.0</b>          | 0.001   | <b>4,406.6</b>          | 0.000   | <b>4,056.4</b>          | 0.000   |  |
| <b>Home care</b>                      |                        |                          |         |                           |         |                         |         |                        |                         |         |                         |         |                         |         |  |
| <b>Home care total</b>                | <b>2.5</b>             | <b>3.2</b>               | 0.851   | <b>4.6</b>                | 0.001   | <b>4.2</b>              | 0.002   | <b>30.7</b>            | <b>60.1</b>             | 0.718   | <b>107.7</b>            | 0.016   | <b>203.3</b>            | 0.015   |  |
| Thereof home care                     |                        |                          |         |                           |         |                         |         |                        |                         |         |                         |         |                         |         |  |
| Home care – Care                      | 1.0                    | 1.6                      | 0.965   | 2.5                       | 0.008   | 2.2                     | 0.013   | 8.3                    | 29.8                    | 0.756   | 69.4                    | 0.019   | 151.7                   | 0.147   |  |
| Home care - Practical help            | 1.5                    | 1.7                      | 0.974   | 2.1                       | 0.078   | 2.0                     | 0.141   | 22.4                   | 30.3                    | 0.982   | 38.4                    | 0.390   | 51.7                    | 0.003   |  |
| <b>Hip (n: 4,093)</b>                 |                        |                          |         |                           |         |                         |         | <b>Hip (n: 658)</b>    |                         |         |                         |         |                         |         |  |
| <b>Health costs (somatic)</b>         |                        |                          |         |                           |         |                         |         |                        |                         |         |                         |         |                         |         |  |
| <b>Inpatient Admissions total</b>     | <b>79.8</b>            | <b>127.1</b>             | 0.000   | <b>274.4</b>              | 0.000   | <b>237.4</b>            | 0.000   | <b>1,099.4</b>         | <b>3,047.2</b>          | 0.000   | <b>2,699.7</b>          | 0.000   | <b>2,141.7</b>          | 0.000   |  |
| Thereof inpatient                     |                        |                          |         |                           |         |                         |         |                        |                         |         |                         |         |                         |         |  |
| Surgery knee/hip                      | 13.0                   | 77.2                     | 0.000   | 181.5                     | 0.000   | 155.3                   | 0.000   | 162.5                  | 1,901.2                 | 0.000   | 1,391.5                 | 0.000   | 901.2                   | 0.000   |  |
| Surgery other                         | 6.8                    | 2.7                      | 0.198   | 10.4                      | 0.732   | 8.4                     | 0.998   | 95.8                   | 122.7                   | 1.000   | 131.9                   | 1.000   | 137.1                   | 0.999   |  |
| <b>Outpatient Services total</b>      | <b>96.4</b>            | <b>87.0</b>              | 0.676   | <b>114.8</b>              | 0.040   | <b>107.8</b>            | 0.453   | <b>1,169.9</b>         | <b>1,259.9</b>          | 1.000   | <b>1,420.9</b>          | 0.947   | <b>1,478.7</b>          | 0.463   |  |
| Thereof outpatient                    |                        |                          |         |                           |         |                         |         |                        |                         |         |                         |         |                         |         |  |
| Surgery knee/hip                      | 0.3                    | 0.7                      | 0.999   | 0.9                       | 0.750   | 0.8                     | 0.661   | 6.8                    | 9.9                     | 1.000   | 0.0                     | 0.996   | 0.0                     | 0.673   |  |
| Surgery other                         | 1.7                    | 3.0                      | 0.855   | 2.2                       | 0.996   | 2.4                     | 0.874   | 28.2                   | 18.3                    | 1.000   | 17.1                    | 0.999   | 15.0                    | 1.000   |  |
| <b>Primary health sector total</b>    | <b>49.1</b>            | <b>79.9</b>              | 0.000   | <b>51.9</b>               | 0.000   | <b>58.9</b>             | 0.000   | <b>571.3</b>           | <b>701.2</b>            | 0.000   | <b>611.1</b>            | 0.934   | <b>594.4</b>            | 0.000   |  |
| Thereof primary                       |                        |                          |         |                           |         |                         |         |                        |                         |         |                         |         |                         |         |  |
| Physiotherapy                         | 6.4                    | 37.5                     | 0.000   | 8.8                       | 0.000   | 16.0                    | 0.000   | 89.6                   | 208.1                   | 0.000   | 91.3                    | 1.000   | 72.0                    | 0.000   |  |
| Chiropractic                          | 0.7                    | 0.5                      | 0.031   | 0.5                       | 0.001   | 0.5                     | 0.001   | 8.1                    | 7.2                     | 1.000   | 4.6                     | 0.034   | 6.4                     | 0.002   |  |
| General practitioner                  | 18.0                   | 16.9                     | 0.041   | 17.9                      | 1.000   | 17.7                    | 0.970   | 206.9                  | 205.7                   | 1.000   | 233.1                   | 0.759   | 218.7                   | 0.972   |  |
| Other primary                         | 23.9                   | 24.9                     | 0.983   | 24.7                      | 0.993   | 24.7                    | 0.986   | 266.6                  | 280.3                   | 1.000   | 292.1                   | 0.973   | 297.3                   | 0.988   |  |
| <b>Prescription medications total</b> | <b>28.7</b>            | <b>29.6</b>              | 1.000   | <b>30.3</b>               | 1.000   | <b>30.1</b>             | 0.977   | <b>316.9</b>           | <b>358.8</b>            | 0.989   | <b>335.2</b>            | 1.000   | <b>349.8</b>            | 0.980   |  |
| Thereof prescription                  |                        |                          |         |                           |         |                         |         |                        |                         |         |                         |         |                         |         |  |
| Painkiller medications                | 3.1                    | 4.1                      | 0.000   | 3.9                       | 0.000   | 4.0                     | 0.000   | 33.4                   | 44.6                    | 0.530   | 37.1                    | 1.000   | 35.8                    | 0.000   |  |
| Not painkiller medications            | 25.7                   | 25.6                     | 1.000   | 26.3                      | 1.000   | 26.1                    | 1.000   | 283.5                  | 314.2                   | 1.000   | 298.1                   | 1.000   | 314.0                   | 1.000   |  |
| <b>Health costs total (somatic)</b>   | <b>254.1</b>           | <b>323.6</b>             | 0.000   | <b>471.5</b>              | 0.000   | <b>434.2</b>            | 0.000   | <b>3,157.5</b>         | <b>5,367.0</b>          | 0.000   | <b>5,066.9</b>          | 0.000   | <b>4,564.6</b>          | 0.000   |  |
| <b>Home care</b>                      |                        |                          |         |                           |         |                         |         |                        |                         |         |                         |         |                         |         |  |
| <b>Home care total</b>                | <b>3.4</b>             | <b>4.0</b>               | 1.000   | <b>4.9</b>                | 0.977   | <b>4.7</b>              | 0.994   | <b>78.3</b>            | <b>108.9</b>            | 1.000   | <b>189.1</b>            | 1.000   | <b>265.0</b>            | 0.994   |  |
| Thereof home care                     |                        |                          |         |                           |         |                         |         |                        |                         |         |                         |         |                         |         |  |
| Home care – Care                      | 1.8                    | 2.1                      | 1.000   | 2.7                       | 0.999   | 2.6                     | 1.000   | 53.1                   | 79.5                    | 1.000   | 152.3                   | 0.995   | 218.6                   | 1.000   |  |
| Home care - Practical help            | 1.6                    | 1.9                      | 1.000   | 2.2                       | 0.710   | 2.1                     | 0.869   | 25.2                   | 29.3                    | 1.000   | 36.8                    | 0.999   | 46.4                    | 0.994   |  |

38 Table S4. Adjusted health care costs and home care costs one year prior to and one or three years following GLA:D® for knee and hip patients

|                                       | One-year horizon        |                |                       |                |                        |                |                     | Three-year horizon      |                     |              |                      |         |                      |         |                      |         |
|---------------------------------------|-------------------------|----------------|-----------------------|----------------|------------------------|----------------|---------------------|-------------------------|---------------------|--------------|----------------------|---------|----------------------|---------|----------------------|---------|
|                                       | Pre-period (1 year)     |                | Post-period (mth 1-3) |                | Post-period (mth 4-12) |                | Post-period (year1) |                         | Pre-period (1 year) |              | Post-period (year 1) |         | Post-period (year 2) |         | Post-period (year 3) |         |
|                                       | Cost (€/month)          | Cost (€/month) | p-value               | Cost (€/month) | p-value                | Cost (€/month) | p-value             | Cost (€/Year)           | Cost (€/year)       | p-value      | Cost (€/year)        | p-value | Cost (€/year)        | p-value | Cost (€/year)        | p-value |
|                                       | <b>Knee<sup>#</sup></b> |                |                       |                |                        |                |                     | <b>Knee<sup>§</sup></b> |                     |              |                      |         |                      |         |                      |         |
| <b>Health costs (somatic)</b>         |                         |                |                       |                |                        |                |                     |                         |                     |              |                      |         |                      |         |                      |         |
| <b>Inpatient Admissions total</b>     | <b>70.2</b>             | <b>61.6</b>    | 0.097                 | <b>159.9</b>   | 0.000                  | <b>135.2</b>   | 0.000               | <b>935.1</b>            | <b>1,657.4</b>      | 0.000        | <b>2,105.4</b>       | 0.000   | <b>1,671.9</b>       | 0.000   |                      |         |
| Thereof inpatient                     |                         |                |                       |                |                        |                |                     |                         |                     |              |                      |         |                      |         |                      |         |
| Surgery knee/hip                      | 9.1                     | 17.5           | 0.000                 | 68.2           | 0.000                  | 55.5           | 0.000               | 176.2                   | 610.9               | 0.000        | 739.9                | 0.000   | 456.0                | 0.000   |                      |         |
| Surgery other                         | 8.9                     | 3.9            | 0.002                 | 10.1           | 0.340                  | 8.5            | 0.767               | 112.1                   | 152.2               | 0.318        | 153.9                | 0.294   | 211.4                | 0.052   |                      |         |
| <b>Outpatient Services total</b>      | <b>105.7</b>            | <b>86.7</b>    | 0.000                 | <b>103.0</b>   | 0.328                  | <b>98.9</b>    | 0.006               | <b>1,415.7</b>          | <b>1,307.8</b>      | 0.273        | <b>1,337.8</b>       | 0.486   | <b>1,352.6</b>       | 0.515   |                      |         |
| Thereof outpatient                    |                         |                |                       |                |                        |                |                     |                         |                     |              |                      |         |                      |         |                      |         |
| Surgery knee/hip                      | 0.7                     | 0.2            | 0.000                 | 0.3            | 0.000                  | 0.3            | 0.000               | 80.6                    | 17.8                | -            | 7.4                  | -       | 6.7                  | -       |                      |         |
| Surgery other                         | 1.7                     | 1.5            | 0.692                 | 1.4            | 0.370                  | 1.5            | 0.376               | 25.4                    | 18.8                | 0.453        | 28.8                 | 0.736   | 38.0                 | 0.291   |                      |         |
| <b>Primary health sector total</b>    | <b>59.4</b>             | <b>92.4</b>    | 0.000                 | <b>60.3</b>    | 0.041                  | <b>68.3</b>    | 0.000               | <b>608.8</b>            | <b>720.2</b>        | 0.000        | <b>632.4</b>         | 0.031   | <b>621.8</b>         | 0.275   |                      |         |
| Thereof primary                       |                         |                |                       |                |                        |                |                     |                         |                     |              |                      |         |                      |         |                      |         |
| Physiotherapy                         | 6.5                     | 42.5           | 0.000                 | 9.5            | 0.000                  | 17.7           | 0.000               | 70.0                    | 190.5               | 0.000        | 71.8                 | 0.584   | 64.3                 | 0.103   |                      |         |
| Chiropractic                          | 0.5                     | 0.5            | 0.144                 | 0.5            | 0.004                  | 0.5            | 0.003               | 5.7                     | 6.3                 | 0.221        | 5.6                  | 0.870   | 5.1                  | 0.264   |                      |         |
| General practitioner                  | 18.3                    | 16.5           | 0.000                 | 17.3           | 0.000                  | 17.1           | 0.000               | 235.4                   | 223.5               | 0.002        | 240.2                | 0.256   | 238.6                | 0.468   |                      |         |
| Other primary                         | 33.7                    | 33.8           | 0.874                 | 32.8           | 0.029                  | 33.1           | 0.082               | 297.9                   | 298.9               | 0.904        | 314.6                | 0.066   | 313.6                | 0.118   |                      |         |
| <b>Prescription medications total</b> | <b>29.5</b>             | <b>30.4</b>    | 0.008                 | <b>30.6</b>    | 0.000                  | <b>30.6</b>    | 0.000               | <b>363.0</b>            | <b>396.8</b>        | 0.000        | <b>415.2</b>         | 0.000   | <b>419.3</b>         | 0.000   |                      |         |
| Thereof prescription                  |                         |                |                       |                |                        |                |                     |                         |                     |              |                      |         |                      |         |                      |         |
| Painkiller medications                | 3.5                     | 3.8            | 0.000                 | 3.9            | 0.000                  | 3.9            | 0.000               | 43.2                    | 47.9                | 0.001        | 49.8                 | 0.001   | 49.2                 | 0.004   |                      |         |
| Not painkiller medications            | 25.8                    | 26.3           | 0.061                 | 26.5           | 0.003                  | 26.4           | 0.003               | 318.8                   | 348.1               | 0.000        | 364.3                | 0.000   | 368.6                | 0.000   |                      |         |
| <b>Health costs total (somatic)</b>   | <b>263.3</b>            | <b>263.7</b>   | 0.952                 | <b>354.0</b>   | 0.000                  | <b>331.3</b>   | 0.000               | <b>3,391.7</b>          | <b>4,146.2</b>      | 0.000        | <b>4,518.3</b>       | 0.000   | <b>4,127.5</b>       | 0.000   |                      |         |
| <b>Home care</b>                      |                         |                |                       |                |                        |                |                     |                         |                     |              |                      |         |                      |         |                      |         |
| <b>Home care total</b>                | <b>2.7</b>              | <b>3.6</b>     | 0.029                 | <b>5.0</b>     | 0.001                  | <b>4.6</b>     | 0.001               | <b>35.5</b>             | <b>77.2</b>         | <b>0.011</b> | <b>131.1</b>         | 0.000   | <b>214.6</b>         | 0.000   |                      |         |
| Thereof home care                     |                         |                |                       |                |                        |                |                     |                         |                     |              |                      |         |                      |         |                      |         |
| Home care – Care                      | 0.9                     | 1.4            | 0.004                 | 2.1            | 0.082                  | 2.0            | 0.153               | 8.5                     | 41.1                | 0.014        | 90.2                 | 0.000   | 149.0                | 0.000   |                      |         |
| Home care - Practical help            | 1.8                     | 2.2            | 0.029                 | 2.8            | 0.000                  | 2.6            | 0.000               | 28.1                    | 44.5                | 0.052        | 53.0                 | 0.001   | 68.1                 | 0.000   |                      |         |
|                                       | <b>Hip<sup>#</sup></b>  |                |                       |                |                        |                |                     | <b>Hip<sup>§</sup></b>  |                     |              |                      |         |                      |         |                      |         |
| <b>Health costs (somatic)</b>         |                         |                |                       |                |                        |                |                     |                         |                     |              |                      |         |                      |         |                      |         |
| <b>Inpatient Admissions total</b>     | <b>71.7</b>             | <b>111.3</b>   | 0.000                 | <b>243.2</b>   | 0.000                  | <b>208.9</b>   | 0.000               | <b>978.4</b>            | <b>2,818.4</b>      | 0.000        | <b>2,461.1</b>       | 0.000   | <b>1,966.0</b>       | 0.006   |                      |         |
| Thereof inpatient                     |                         |                |                       |                |                        |                |                     |                         |                     |              |                      |         |                      |         |                      |         |
| Surgery knee/hip                      | 11.6                    | 67.0           | 0.000                 | 167.5          | 0.000                  | 142.3          | 0.000               | 138.1                   | 1,734.6             | 0.000        | 1,294.2              | 0.000   | 788.5                | 0.000   |                      |         |
| Surgery other                         | 6.9                     | 1.3            | 0.001                 | 11.8           | 0.086                  | 9.2            | 0.353               | 89.2                    | 145.3               | 0.342        | 129.6                | 0.465   | 139.2                | 0.370   |                      |         |
| <b>Outpatient Services total</b>      | <b>77.1</b>             | <b>68.9</b>    | 0.006                 | <b>91.2</b>    | 0.000                  | <b>85.4</b>    | 0.012               | <b>1,174.6</b>          | <b>1,270.1</b>      | 0.401        | <b>1,441.3</b>       | 0.074   | <b>1,513.5</b>       | 0.038   |                      |         |
| Thereof outpatient                    |                         |                |                       |                |                        |                |                     |                         |                     |              |                      |         |                      |         |                      |         |
| Surgery knee/hip*                     | 0.0                     | 0.0            | 0.238                 | 0.2            | 0.000                  | 0.1            | 0.000               | -                       | -                   | -            | -                    | -       | -                    | -       |                      |         |
| Surgery other                         | 0.4                     | 0.3            | 0.799                 | 0.4            | 0.927                  | 0.4            | 0.881               | 37.7                    | 29.6                | 0.643        | 24.5                 | 0.383   | 22.1                 | 0.395   |                      |         |
| <b>Primary health sector total</b>    | <b>58.7</b>             | <b>96.3</b>    | 0.000                 | <b>62.4</b>    | 0.000                  | <b>70.9</b>    | 0.000               | <b>584.9</b>            | <b>719.9</b>        | 0.000        | <b>625.2</b>         | 0.021   | <b>608.4</b>         | 0.231   |                      |         |
| Thereof primary                       |                         |                |                       |                |                        |                |                     |                         |                     |              |                      |         |                      |         |                      |         |
| Physiotherapy                         | 8.1                     | 47.7           | 0.000                 | 11.0           | 0.000                  | 20.2           | 0.000               | 94.5                    | 221.7               | 0.000        | 96.4                 | 0.805   | 74.8                 | 0.003   |                      |         |
| Chiropractic                          | 0.5                     | 0.4            | 0.000                 | 0.4            | 0.000                  | 0.4            | 0.000               | 8.9                     | 7.3                 | 0.143        | 4.9                  | 0.000   | 6.6                  | 0.144   |                      |         |
| General practitioner                  | 17.3                    | 16.3           | 0.000                 | 17.2           | 0.346                  | 16.9           | 0.019               | 214.1                   | 212.0               | 0.728        | 228.4                | 0.020   | 224.9                | 0.120   |                      |         |
| Other primary                         | 32.4                    | 33.9           | 0.120                 | 34.0           | 0.038                  | 33.9           | 0.029               | 269.0                   | 283.3               | 0.386        | 294.0                | 0.098   | 300.4                | 0.056   |                      |         |
| <b>Prescription medications total</b> | <b>28.3</b>             | <b>28.9</b>    | 0.333                 | <b>29.6</b>    | 0.005                  | <b>29.4</b>    | 0.023               | <b>337.5</b>            | <b>381.9</b>        | 0.016        | <b>350.5</b>         | 0.642   | <b>368.7</b>         | 0.298   |                      |         |
| Thereof prescription                  |                         |                |                       |                |                        |                |                     |                         |                     |              |                      |         |                      |         |                      |         |
| Painkiller medications                | 2.9                     | 3.8            | 0.000                 | 3.7            | 0.000                  | 3.7            | 0.000               | 38.0                    | 49.2                | 0.000        | 41.8                 | 0.189   | 41.5                 | 0.327   |                      |         |
| Not painkiller medications            | 25.2                    | 24.8           | 0.452                 | 25.7           | 0.330                  | 25.4           | 0.747               | 298.0                   | 332.1               | 0.058        | 306.2                | 0.766   | 324.5                | 0.365   |                      |         |
| <b>Health costs total (somatic)</b>   | <b>234.5</b>            | <b>297.6</b>   | 0.000                 | <b>433.0</b>   | 0.000                  | <b>397.3</b>   | 0.000               | <b>3,051.0</b>          | <b>5,207.7</b>      | 0.000        | <b>4,902.1</b>       | 0.000   | <b>4,473.4</b>       | 0.001   |                      |         |
| <b>Home care</b>                      |                         |                |                       |                |                        |                |                     |                         |                     |              |                      |         |                      |         |                      |         |
| <b>Home care total</b>                | <b>1.1</b>              | <b>1.7</b>     | 0.255                 | <b>1.9</b>     | 0.009                  | <b>1.9</b>     | 0.009               | <b>82.4</b>             | <b>111.4</b>        | 0.012        | <b>214.5</b>         | 0.000   | <b>406.0</b>         | 0.041   |                      |         |
| Thereof home care                     |                         |                |                       |                |                        |                |                     |                         |                     |              |                      |         |                      |         |                      |         |
| Home care – Care                      | 0.3                     | 0.3            | 0.881                 | 0.4            | 0.195                  | 0.4            | 0.264               | 55.1                    | 79.1                | 0.099        | 173.3                | 0.062   | 356.3                | 0.064   |                      |         |

|   |                            |                                                                                                                                                                                                                |     |       |     |       |     |       |      |      |       |      |       |      |       |
|---|----------------------------|----------------------------------------------------------------------------------------------------------------------------------------------------------------------------------------------------------------|-----|-------|-----|-------|-----|-------|------|------|-------|------|-------|------|-------|
| 1 | Home care - Practical help | 1.1                                                                                                                                                                                                            | 1.4 | 0.067 | 1.7 | 0.010 | 1.7 | 0.008 | 28.7 | 33.1 | 0.001 | 46.1 | 0.000 | 61.0 | 0.012 |
| 2 | 39                         | #Adjusted health care costs and costs for home care in one-year horizon for women, 65 years, married/co-living, Danish ethnicity, low education and living in the Capital Region estimated using a generalized |     |       |     |       |     |       |      |      |       |      |       |      |       |
| 3 | 40                         | estimating equation gamma regression model for repeated measures including sex, age, marital status, ethnicity, education and region as covariates. Because of no convergence in the model material status and |     |       |     |       |     |       |      |      |       |      |       |      |       |
| 4 | 41                         | ethnicity were omitted estimating costs for home care.                                                                                                                                                         |     |       |     |       |     |       |      |      |       |      |       |      |       |
| 5 | 42                         | §Adjusted health care costs and costs for home care in three-year horizon for women, 65 years, married/co-living and low education estimated using a generalized estimating equation gamma regression model    |     |       |     |       |     |       |      |      |       |      |       |      |       |
| 6 | 43                         | for repeated measures including sex, age and education. Because of no convergence in the model age and education were omitted estimating costs for home care.                                                  |     |       |     |       |     |       |      |      |       |      |       |      |       |
| 7 | 44                         | &Surgery is not predicted in a three-year horizon because of no convergence of the model.                                                                                                                      |     |       |     |       |     |       |      |      |       |      |       |      |       |
| 8 | 45                         |                                                                                                                                                                                                                |     |       |     |       |     |       |      |      |       |      |       |      |       |

For peer review only

1  
2  
3  
4 46 **Table S5. Sensitivity analysis - adjusted estimated health care cost per QALY from baseline to 12**  
5 47 **months for knee and hip patients attending GLA:D® in private clinics, municipal clinics and patients**  
6 48 **with complete information**  
7  
8  
9 49

|                                     | Knee                                      |                                  |                          | Hip                                       |                                  |                           |
|-------------------------------------|-------------------------------------------|----------------------------------|--------------------------|-------------------------------------------|----------------------------------|---------------------------|
|                                     | Change in health care costs (€) (95 % CI) | Change in EQ-5D (QALY) (95 % CI) | Euro pr. QALY (95 % CI)  | Change in health care costs (€) (95 % CI) | Change in EQ-5D (QALY) (95 % CI) | Euro pr. QALY (95 % CI)   |
| <b>Private clinic<sup>§</sup></b>   | 267<br>(181-385)                          | 0.036<br>(0.033-0.038)           | 7,464<br>(5,485-10,132)  | 651<br>(398-1,050)                        | 0.028<br>(0.024-0.033)           | 22,914<br>(16,583-31,818) |
| <b>Municipal clinic<sup>#</sup></b> | 396<br>(118-949)                          | 0.032<br>(0.026-0.039)           | 12,292<br>(4,538-24,333) | 443<br>(69-2,056)                         | 0.028<br>(0.017-0.043)           | 15,550<br>(4,059-47,814)  |
| <b>Complete cases<sup>‡</sup></b>   | 167<br>(74-310)                           | 0.035<br>(0.032-0.037)           | 4,829<br>(2,313-8,378)   | 579<br>(284-1,142)                        | 0.027<br>(0.023-0.032)           | 21,067<br>(12,348-35,388) |

50 All analyses are adjusted for age, gender, marital status, ethnicity, educational level and region

51 <sup>§</sup>Analysis restricted to patients attending GLA:D® in a private clinic

52 <sup>#</sup>Analysis restricted to patients attending GLA:D® in a private clinic

53 <sup>‡</sup>Analysis restricted to patients with complete information on EQ-5D

# CHEERS Checklist

CHEERS checklist—Items to include when reporting economic evaluations of health interventions

| Section/item                    | Item No | Recommendation                                                                                                                                                                          | Reported on page No/ line No |
|---------------------------------|---------|-----------------------------------------------------------------------------------------------------------------------------------------------------------------------------------------|------------------------------|
| <b>Title and abstract</b>       |         |                                                                                                                                                                                         |                              |
| Title                           | 1       | Identify the study as an economic evaluation or use more specific terms such as “cost-effectiveness analysis”, and describe the interventions compared.                                 | Title, page 1                |
| Abstract                        | 2       | Provide a structured summary of objectives, perspective, setting, methods (including study design and inputs), results (including base case and uncertainty analyses), and conclusions. | Abstract, page 2             |
| <b>Introduction</b>             |         |                                                                                                                                                                                         |                              |
| Background and objectives       | 3       | Provide an explicit statement of the broader context for the study.                                                                                                                     | Line 75-81                   |
|                                 |         | Present the study question and its relevance for health policy or practice decisions.                                                                                                   | Line 88-91                   |
| <b>Methods</b>                  |         |                                                                                                                                                                                         |                              |
| Target population and subgroups | 4       | Describe characteristics of the base case population and subgroups analysed, including why they were chosen.                                                                            | Line 125 –142                |
| Setting and location            | 5       | State relevant aspects of the system(s) in which the decision(s) need(s) to be made.                                                                                                    | Line 110-117                 |
| Study perspective               | 6       | Describe the perspective of the study and relate this to the costs being evaluated.                                                                                                     | Line 97-102                  |
| Comparators                     | 7       | Describe the interventions or strategies being compared and state why they were chosen.                                                                                                 | Line 97-102                  |

| Section/item                                           | Item No | Recommendation                                                                                                                                                                                                                                                                                                              | Reported on page No/ line No |
|--------------------------------------------------------|---------|-----------------------------------------------------------------------------------------------------------------------------------------------------------------------------------------------------------------------------------------------------------------------------------------------------------------------------|------------------------------|
| Time horizon                                           | 8       | State the time horizon(s) over which costs and consequences are being evaluated and say why appropriate.                                                                                                                                                                                                                    | Line 97-102                  |
| Discount rate                                          | 9       | Report the choice of discount rate(s) used for costs and outcomes and say why appropriate.                                                                                                                                                                                                                                  | N/A                          |
| Choice of health outcomes                              | 10      | Describe what outcomes were used as the measure(s) of benefit in the evaluation and their relevance for the type of analysis performed.                                                                                                                                                                                     | Line 97-102;                 |
| Measurement of effectiveness                           | 11a     | <i>Single study-based estimates:</i> Describe fully the design features of the single effectiveness study and why the single study was a sufficient source of clinical effectiveness data.                                                                                                                                  | Line 183-188                 |
|                                                        | 11b     | <i>Synthesis-based estimates:</i> Describe fully the methods used for identification of included studies and synthesis of clinical effectiveness data.                                                                                                                                                                      | -                            |
| Measurement and valuation of preference based outcomes | 12      | If applicable, describe the population and methods used to elicit preferences for outcomes.                                                                                                                                                                                                                                 | N/A                          |
| Estimating resources and costs                         | 13a     | <i>Single study-based economic evaluation:</i> Describe approaches used to estimate resource use associated with the alternative interventions. Describe primary or secondary research methods for valuing each resource item in terms of its unit cost. Describe any adjustments made to approximate to opportunity costs. | Line 146-181                 |
|                                                        | 13b     | <i>Model-based economic evaluation:</i> Describe approaches and data sources used to estimate resource use associated with model health states. Describe primary or secondary research methods for                                                                                                                          | -                            |

| Section/item                         | Item No | Recommendation                                                                                                                                                                                                                                                                                                                                        | Reported on page No/ line No |
|--------------------------------------|---------|-------------------------------------------------------------------------------------------------------------------------------------------------------------------------------------------------------------------------------------------------------------------------------------------------------------------------------------------------------|------------------------------|
|                                      |         | valuing each resource item in terms of its unit cost. Describe any adjustments made to approximate to opportunity costs.                                                                                                                                                                                                                              |                              |
| Currency, price date, and conversion | 14      | Report the dates of the estimated resource quantities and unit costs. Describe methods for adjusting estimated unit costs to the year of reported costs if necessary. Describe methods for converting costs into a common currency base and the exchange rate.                                                                                        | Line 154-158                 |
| Choice of model                      | 15      | Describe and give reasons for the specific type of decision-analytical model used. Providing a figure to show model structure is strongly recommended.                                                                                                                                                                                                | N/A                          |
| Assumptions                          | 16      | Describe all structural or other assumptions underpinning the decision-analytical model.                                                                                                                                                                                                                                                              | N/A                          |
| Analytical methods                   | 17      | Describe all analytical methods supporting the evaluation. This could include methods for dealing with skewed, missing, or censored data; extrapolation methods; methods for pooling data; approaches to validate or make adjustments (such as half cycle corrections) to a model; and methods for handling population heterogeneity and uncertainty. | Line 210-219; Line 229-235   |
| <b>Results</b>                       |         |                                                                                                                                                                                                                                                                                                                                                       |                              |
| Study parameters                     | 18      | Report the values, ranges, references, and, if used, probability distributions for all parameters. Report reasons or sources for distributions used to represent uncertainty where appropriate. Providing a table to show the input values is strongly recommended.                                                                                   | Line 146-181                 |



| Section/item                                                         | Item No | Recommendation                                                                                                                                                                                                                                                              | Reported on page No/ line No                   |
|----------------------------------------------------------------------|---------|-----------------------------------------------------------------------------------------------------------------------------------------------------------------------------------------------------------------------------------------------------------------------------|------------------------------------------------|
| Incremental costs and outcomes                                       | 19      | For each intervention, report mean values for the main categories of estimated costs and outcomes of interest, as well as mean differences between the comparator groups. If applicable, report incremental cost-effectiveness ratios.                                      | Table 3; Table 4; Figure 2; Table S2; Table S3 |
| Characterising uncertainty                                           | 20a     | <i>Single study-based economic evaluation:</i> Describe the effects of sampling uncertainty for the estimated incremental cost and incremental effectiveness parameters, together with the impact of methodological assumptions (such as discount rate, study perspective). | N/A                                            |
|                                                                      | 20b     | <i>Model-based economic evaluation:</i> Describe the effects on the results of uncertainty for all input parameters, and uncertainty related to the structure of the model and assumptions.                                                                                 | -                                              |
| Characterising heterogeneity                                         | 21      | If applicable, report differences in costs, outcomes, or cost-effectiveness that can be explained by variations between subgroups of patients with different baseline characteristics or other observed variability in effects that are not reducible by more information.  | Line 237-241                                   |
| <b>Discussion</b>                                                    |         |                                                                                                                                                                                                                                                                             |                                                |
| Study findings, limitations, generalisability, and current knowledge | 22      | Summarise key study findings and describe how they support the conclusions reached. Discuss limitations and the generalisability of the findings and how the findings fit with current knowledge.                                                                           | Discussion                                     |
| <b>Other</b>                                                         |         |                                                                                                                                                                                                                                                                             |                                                |
| Source of funding                                                    | 23      | Describe how the study was funded and the role of the funder in the identification, design, conduct, and                                                                                                                                                                    | Line 455-456                                   |

| Section/item          | Item No | Recommendation                                                                                                                                                                                                                                    | Reported on page No/ line No |
|-----------------------|---------|---------------------------------------------------------------------------------------------------------------------------------------------------------------------------------------------------------------------------------------------------|------------------------------|
|                       |         | reporting of the analysis. Describe other non-monetary sources of support.                                                                                                                                                                        |                              |
| Conflicts of interest | 24      | Describe any potential for conflict of interest of study contributors in accordance with journal policy. In the absence of a journal policy, we recommend authors comply with International Committee of Medical Journal Editors recommendations. | Line 469-483                 |

For consistency, the CHEERS statement checklist format is based on the format of the CONSORT statement checklist

peer review only

1  
2  
3  
4  
5  
6  
7  
8  
9  
10  
11  
12  
13  
14  
15  
16  
17  
18  
19  
20  
21  
22  
23  
24  
25  
26  
27  
28  
29  
30  
31  
32  
33  
34  
35  
36  
37  
38  
39  
40  
41  
42  
43  
44  
45  
46
