# Supplementary material for: Cost-effectiveness of an 8-week supervised education and exercise therapy programme for knee and hip osteoarthritis: a pre–post analysis of 16 255 patients participating in Good Life with osteoArthritis in Denmark (GLA:D)
Source: PubMed Central journal article supplement — BMJ Open. 2021 Dec 12;11(12):e049541. doi: 10.1136/bmjopen-2021-049541 (PMC8672017; doi:10.1136/bmjopen-2021-049541), 2021-12-12
Supplement: bmjopen-2021-049541supp001.pdf [file bmjopen-2021-049541supp001.pdf]

# 1 **Supplementary Appendix**

2

3 Figure S1: Illustration of how quality of life was calculated the year pre- and post-intervention

4 Table S1: Baseline characteristics in patients with complete information and patients with loss to  
5 follow up

6 Table S2: Mean public transfer payments one year prior to and one or three years following  
7 GLA:D<sup>®</sup> for knee and hip patients

8 Table S3: Mean health care costs and home care costs one year prior to and one or three years  
9 following GLA:D<sup>®</sup> for knee and hip patients

10 Table S4: Adjusted health care costs and home care costs one year prior to and one or three years  
11 following GLA:D<sup>®</sup> for knee and hip patients

12 Table S5. Sensitivity analysis - adjusted estimated health care cost per QALY from baseline to 12  
13 months for knee and hip patients attending GLA:D<sup>®</sup> in private clinics, municipal clinics and  
14 patients with complete information

15 **Figure S1: Illustration of how quality of life was calculated the year pre and post intervention**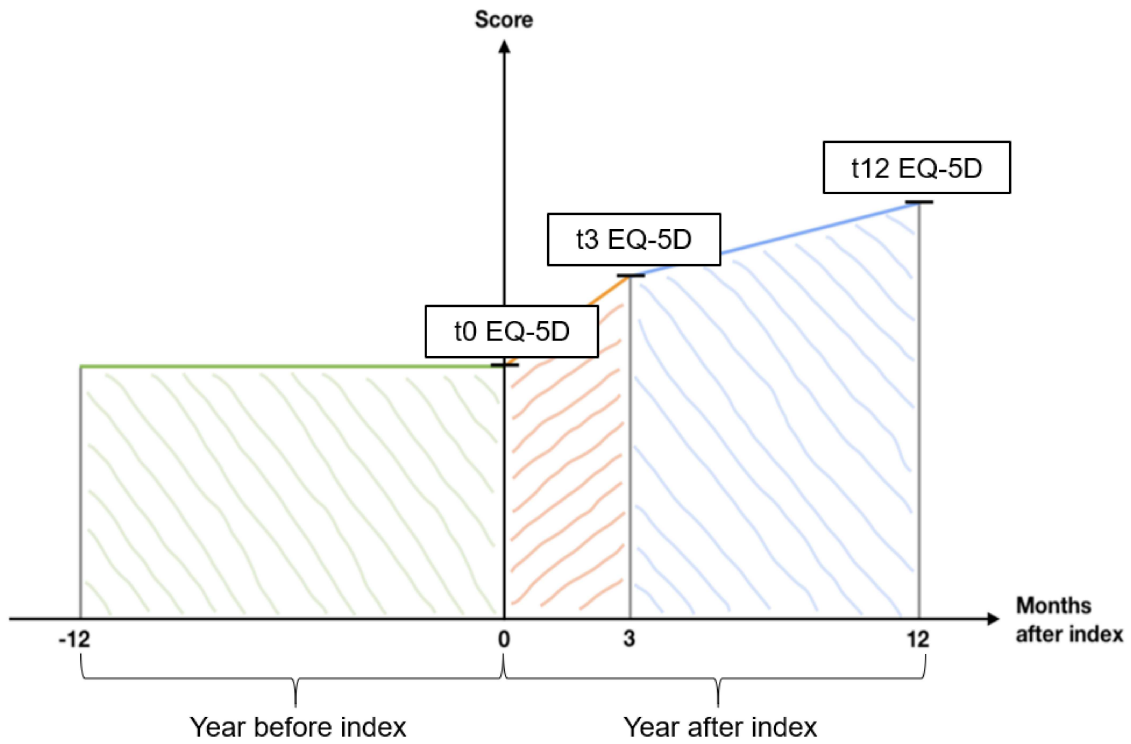

16

17 **Table S1: Baseline characteristics in patients with complete information and patients who had**  
 18 **incomplete information**

|                                                             | Complete information |                   | Incomplete information |                   |
|-------------------------------------------------------------|----------------------|-------------------|------------------------|-------------------|
|                                                             | Knee<br>(n: 6,990)   | Hip<br>(n: 2,349) | Knee<br>(n: 5,173)     | Hip<br>(n: 1,749) |
| <b>Age</b> (years), mean (SD)                               | 64.4 (9.1)           | 65.7 (8.7)        | 63.7 (10.7)            | 65.7 (10.3)       |
| <b>Gender</b> (Female), % (n)                               | 73.2 (5,113)         | 74.6 (1,753)      | 73.0 (3,777)           | 72.2 (1,263)      |
| <b>BMI</b> (kg/m <sup>2</sup> ), mean (SD)                  | 28.4 (5.2)           | 26.6 (4.4)        | 28.9 (5.4)             | 27.2 (4.9)        |
| <b>Marital status</b> , % (n)                               |                      |                   |                        |                   |
| Married or living with others                               | 75 (5,256)           | 73 (1,714)        | 69 (3,547)             | 68 (1,179)        |
| Single                                                      | 25 (1,730)           | 27 (634)          | 31 (1,629)             | 32 (566)          |
| <b>Ethnic background</b> , % (n)                            |                      |                   |                        |                   |
| Danish                                                      | 97 (6,773)           | 97 (2,276)        | 95 (4,928)             | 97 (1,685)        |
| Other western                                               | 2 (160)              | 3 (60)            | 3 (139)                | 3 (46)            |
| Not western                                                 | 1 (53)               | 0.5 (11)          | 2 (107)                | 0.8 (14)          |
| <b>Educational level</b> , % (n)                            |                      |                   |                        |                   |
| Primary                                                     | 17 (1,177)           | 18 (420)          | 21 (1,100)             | 22 (386)          |
| Secondary                                                   | 3 (197)              | 3 (69)            | 3 (170)                | 2 (43)            |
| Vocational                                                  | 38 (2,671)           | 34 (792)          | 40 (2,090)             | 39 (689)          |
| Short-term                                                  | 5 (322)              | 5 (123)           | 5 (236)                | 4 (62)            |
| Bachelor                                                    | 28 (1,999)           | 31 (722)          | 31 (1,187)             | 24 (423)          |
| Long-term                                                   | 8 (546)              | 9 (200)           | 9 (327)                | 7 (129)           |
| Unknown                                                     | 1 (74)               | 1 (22)            | 1 (66)                 | 1 (13)            |
| <b>Social status</b> , % (n)                                |                      |                   |                        |                   |
| Employed                                                    | 44 (3,012)           | 37 (866)          | 44 (2,252)             | 37 (627)          |
| Unemployed                                                  | 0.5 (35)             | 0.3 (6)           | 0.8 (42)               | 0.4 (7)           |
| Sick pay (public funded)                                    | 0.5 (37)             | 0.4 (9)           | 1 (49)                 | 0.3 (6)           |
| Disability pension                                          | 3 (228)              | 3 (76)            | 4 (216)                | 4 (76)            |
| Early retirement                                            | 8 (527)              | 9 (2025)          | 5 (239)                | 6 (95)            |
| Age pension                                                 | 43 (3,006)           | 49 (1,137)        | 43 (2,203)             | 52 (891)          |
| Other                                                       | 1 (69)               | 1 (33)            | 1 (68)                 | 0.8 (14)          |
| <b>Sick leave</b> <sup>†</sup> , % (n)                      | 4.9 (314)            | 3.2 (77)          | 6.8 (353)              | 3.8 (67)          |
| <b>Administrative region</b> , % (n)                        |                      |                   |                        |                   |
| Capital Region                                              | 27 (1,875)           | 26 (606)          | 29 (1,492)             | 30 (525)          |
| Region Zealand                                              | 13 (936)             | 14 (327)          | 12 (642)               | 12 (208)          |
| Region of Southern Denmark                                  | 23 (1,579)           | 26 (602)          | 21 (1,075)             | 25 (428)          |
| Central Denmark Region                                      | 26 (1,796)           | 26 (609)          | 25 (1,275)             | 24 (412)          |
| North Denmark Region                                        | 11 (800)             | 9 (204)           | 13 (1,289)             | 10 (172)          |
| <b>Number of comorbidities</b> <sup>‡</sup> , % (n)         |                      |                   |                        |                   |
| 0                                                           | 39.2 (2,575)         | 41.9 (928)        | 36.9 (1,798)           | 36.5 (608)        |
| 1                                                           | 36.2 (2,381)         | 35.5 (787)        | 35.0 (1,704)           | 34.7 (578)        |
| 2                                                           | 17.0 (1,118)         | 15.8 (350)        | 17.8 (867)             | 18.1 (302)        |
| 3 or more                                                   | 7.7 (504)            | 6.9 (152)678      | 10.4 (505)             | 10.7 (178)        |
| <b>Symptom duration</b> (months), median (IQR)              | 24 (7-60)            | 24 (8-48)         | 24 (7-60)              | 24 (8-48)         |
| <b>Pain intensity</b> (VAS 0-100, best to worst), mean (SD) | 47.3 (21.8)          | 45.9 (21.4)       | 50.3 (22.3)            | 49.7 (22.0)       |
| <b>Bilateral symptoms</b> , % (n)                           | 46.7 (3,259)         | 26.6 (622)        | 45.7 (2,355)           | 25.4 (442)        |
| <b>Walk speed</b> <sup>#</sup> (m/sec), mean (SD)           | 1.51 (0.32)          | 1.52 (0.33)       | 1.46 (0.35)            | 1.45 (0.35)       |

|                                                                    |              |              |              |              |
|--------------------------------------------------------------------|--------------|--------------|--------------|--------------|
| <b>Previous surgery in worst joint<sup>‡</sup>, % (n)</b>          | 30.2 (2,112) | 3.2 (78)     | 31.3 (1,619) | 4.8 (84)     |
| <b>Receive home care, % (n)</b>                                    | 8.9 (621)    | 9.6 (224)    | 11.5 (593)   | 12.4 (215)   |
| <b>Use of pain medication<sup>§</sup> (yes), % (n)</b>             |              |              |              |              |
| Overall                                                            | 60.9 (4,256) | 62.7 (1,473) | 61.8 (3,196) | 66.1 (1,156) |
| Paracetamol                                                        | 49.5 (3,463) | 52.9 (1,243) | 50.5 (2,610) | 53.8 (941)   |
| NSAIDs                                                             | 35.8 (2,504) | 32.5 (764)   | 35.2 (1,821) | 37.5 (655)   |
| Opioids                                                            | 6.6 (459)    | 8.1 (190)    | 7.9 (409)    | 10.1 (177)   |
| <b>KOOS/HOOS QOL<sup>*</sup> (0-100, best to worst), mean (SD)</b> | 46.0 (14.5)  | 47.9 (15.0)  | 44.1 (15.0)  | 46.7 (15.3)  |

19 Missing values: BMI: n: 2 (knee, complete), n: 5 (hip, complete), n: 3 (knee, incomplete), n: 2 (hip, incomplete); Ethnic background: n: 1 (hip,  
20 complete), n: 2 (knee, incomplete); Social status: n: 72 (knee, complete), n: 19 (hip, complete), n: 107 (knee, incomplete), n: 29 (hip, incomplete);  
21 Sick leave: n: 6 (knee, complete), n: 1 (hip, complete), n: 19 (knee, incomplete), n: 3 (hip, incomplete); Number of comorbidities: n: 412 (knee,  
22 complete), n: 132 (hip, complete), n: 299 (knee, incomplete), n: 83 (hip, incomplete); Symptom duration (mainly missing due to technical problems):  
23 n: 1,730 (knee, complete), n: 595 (hip, complete), n: 1,427 (knee, incomplete), n: 501 (hip, incomplete); Pain intensity: n: 8 (knee, complete), n: 3  
24 (hip, complete), n: 15 (knee, incomplete), n: 6 (hip, incomplete); Bilateral symptoms: n: 14 (knee, complete), n: 10 (hip, complete), n: 18 (knee,  
25 incomplete), n: 10 (hip, incomplete); Walk speed: n: 309 (knee, complete), n: 100 (hip, complete), n: 301 (knee, incomplete), n: 121 (hip,  
26 incomplete); Receive home care: n: 31 (knee, complete), n: 8 (hip, complete), n: 36 (knee, incomplete), n: 8 (hip, incomplete); KOOS/HOOS QOL: n:  
27 17 (knee, complete), n: 9 (hip, complete), n: 19 (knee, incomplete), n: 10 (hip, incomplete).

28 <sup>‡</sup>Walking speed was assessed with the 40 m Fast-paces Walk Test under instruction of the GLA:D<sup>®</sup>-therapist

29 <sup>§</sup>Self-reported use of pain medication during last 3 months

30 <sup>||</sup>Self-reported sick leave for more than 1 month during last year due to knee/hip

31 <sup>¶</sup>Number of comorbidities calculated from self-report of the following conditions: hypertension, cardiovascular diseases, lung diseases, diabetes,  
32 stomach diseases, liver- or kidney diseases, blood diseases, cancer, depression, rheumatoid arthritis, neurological disorders, other medical diseases

33 <sup>‡</sup>Self-reported previous surgery in worst joint

34 <sup>\*</sup>Knee injury and Osteoarthritis Outcome Score or Hip disability or Osteoarthritis Outcome Score Quality Of Life sub-scale score

35 Table S2. Mean public transfer payments one year prior to and one or three years following GLA:D® for knee and hip patients

|                                 | One-year horizon                             |             |                       |             |                        |             |                      | Three-year horizon                         |                     |            |                      |         |                      |         |                      |         |
|---------------------------------|----------------------------------------------|-------------|-----------------------|-------------|------------------------|-------------|----------------------|--------------------------------------------|---------------------|------------|----------------------|---------|----------------------|---------|----------------------|---------|
|                                 | Pre-period (1 year)                          |             | Post-period (mth 1-3) |             | Post-period (mth 4-12) |             | Post-period (1 year) |                                            | Pre-period (1 year) |            | Post-period (year 1) |         | Post-period (year 2) |         | Post-period (year 3) |         |
|                                 | Weeks/month                                  | Weeks/month | p-value               | Weeks/month | p-value                | Weeks/month | p-value              | Weeks/month                                | p-value             | Weeks/year | Weeks/year           | p-value | Weeks/year           | p-value | Weeks/year           | p-value |
|                                 | <b>Knee patients in workforce (n: 5,586)</b> |             |                       |             |                        |             |                      | <b>Knee patients in workforce (n: 905)</b> |                     |            |                      |         |                      |         |                      |         |
| <b>Public transfer payments</b> |                                              |             |                       |             |                        |             |                      |                                            |                     |            |                      |         |                      |         |                      |         |
| Unemployed                      | 0.26                                         | 0.29        | 0.465                 | 0.30        | 0.104                  | 0.29        | 0.148                | 2.93                                       | 3.23                | 0.996      | 3.03                 | 1.000   | 2.91                 | 1.000   |                      |         |
| Sheltered employment            | 0.17                                         | 0.16        | 1.000                 | 0.16        | 1.000                  | 0.16        | 1.000                | 1.48                                       | 1.52                | 1.000      | 1.61                 | 1.000   | 1.68                 | 0.999   |                      |         |
| Sick pay                        | 0.14                                         | 0.19        | 0.000                 | 0.16        | 0.807                  | 0.17        | 0.159                | 1.55                                       | 1.88                | 0.830      | 1.64                 | 1.000   | 1.24                 | 0.798   |                      |         |
| Rehabilitation                  | 0.01                                         | 0.01        | 0.998                 | 0.01        | 1.000                  | 0.01        | 0.999                | 0.09                                       | 0.03                | 0.964      | 0.09                 | 1.000   | 0.06                 | 1.000   |                      |         |
| Education                       | 0.01                                         | 0.01        | 1.000                 | 0.01        | 1.000                  | 0.01        | 1.000                | 0.20                                       | 0.18                | 1.000      | 0.23                 | 1.000   | 0.20                 | 1.000   |                      |         |
| Disability pension              | 0.29                                         | 0.30        | 1.000                 | 0.29        | 1.000                  | 0.30        | 1.000                | 3.51                                       | 3.53                | 1.000      | 3.20                 | 0.000   | 2.93                 | 0.939   |                      |         |
| Early retirement                | 0.37                                         | 0.46        | 0.001                 | 0.46        | 0.002                  | 0.46        | 0.001                | 5.58                                       | 6.73                | 0.598      | 6.36                 | 0.907   | 4.89                 | 0.935   |                      |         |
|                                 | <b>Hip patients in workforce (n: 1,543)</b>  |             |                       |             |                        |             |                      | <b>Hip patients in workforce (n: 264)</b>  |                     |            |                      |         |                      |         |                      |         |
| <b>Public transfer payments</b> |                                              |             |                       |             |                        |             |                      |                                            |                     |            |                      |         |                      |         |                      |         |
| Unemployed                      | 0.22                                         | 0.23        | 1.000                 | 0.24        | 0.998                  | 0.23        | 0.999                | 2.28                                       | 2.57                | 1.000      | 2.30                 | 1.000   | 1.80                 | 0.995   |                      |         |
| Sheltered employment            | 0.16                                         | 0.16        | 1.000                 | 0.16        | 1.000                  | 0.16        | 1.000                | 1.72                                       | 1.72                | 1.000      | 1.50                 | 1.000   | 1.78                 | 1.000   |                      |         |
| Sick pay                        | 0.10                                         | 0.14        | 0.202                 | 0.16        | 0.006                  | 0.15        | 0.009                | 1.35                                       | 1.85                | 0.963      | 1.72                 | 0.992   | 1.48                 | 1.000   |                      |         |
| Rehabilitation                  | 0.00                                         | 0.01        | 0.996                 | 0.00        | 1.000                  | 0.00        | 1.000                | 0.04                                       | 0.06                | 1.000      | 0.19                 | 0.986   | 0.41                 | 0.622   |                      |         |
| Education                       | 0.01                                         | 0.01        | 1.000                 | 0.01        | 1.000                  | 0.01        | 1.000                | 0.27                                       | 0.20                | 1.000      | 0.20                 | 1.000   | 0.12                 | 0.997   |                      |         |
| Disability pension              | 0.37                                         | 0.37        | 1.000                 | 0.37        | 1.000                  | 0.37        | 1.000                | 4.34                                       | 4.45                | 1.000      | 3.98                 | 1.000   | 3.47                 | 0.991   |                      |         |
| Early retirement                | 0.45                                         | 0.56        | 0.128                 | 0.56        | 0.129                  | 0.56        | 0.126                | 7.73                                       | 9.78                | 0.810      | 8.59                 | 0.999   | 6.08                 | 0.876   |                      |         |

36

37 Table S3. Mean health care costs and home care costs one year prior to and one or three years following GLA:D® for knee and hip patients

|                                       | Pre-period (1 year) |                | Post-period (mth 1-3) |                | Post-period (mth 4-12) |                | Post-period (1 year) |                        | Pre-period (1 year) |         | Post-period (year 1) |         | Post-period (year 2) |         | Post-period (year 3) |         |
|---------------------------------------|---------------------|----------------|-----------------------|----------------|------------------------|----------------|----------------------|------------------------|---------------------|---------|----------------------|---------|----------------------|---------|----------------------|---------|
|                                       | Cost (£/month)      | Cost (£/month) | p-value               | Cost (£/month) | p-value                | Cost (£/month) | p-value              | Cost (£/Year)          | Cost (£/Year)       | p-value | Cost (£/Year)        | p-value | Cost (£/Year)        | p-value | Cost (£/Year)        | p-value |
| <b>Knee (n: 12,162)</b>               |                     |                |                       |                |                        |                |                      | <b>Knee (n: 1,879)</b> |                     |         |                      |         |                      |         |                      |         |
| <b>Health costs (somatic)</b>         |                     |                |                       |                |                        |                |                      |                        |                     |         |                      |         |                      |         |                      |         |
| <b>Inpatient Admissions total</b>     | 73.1                | 67.7           | 0.999                 | 170.6          | 0.000                  | 144.8          | 0.000                | 962.1                  | 1,785.3             | 0.000   | 2,086.1              | 0.000   | 1,729.7              | 0.000   |                      |         |
| Thereof inpatient                     |                     |                |                       |                |                        |                |                      |                        |                     |         |                      |         |                      |         |                      |         |
| Surgery knee/hip                      | 9.6                 | 17.9           | 0.004                 | 67.7           | 0.000                  | 55.2           | 0.000                | 160.0                  | 618.4               | 0.000   | 681.6                | 0.000   | 428.7                | 0.000   |                      |         |
| Surgery other                         | 11.3                | 4.9            | 0.000                 | 14.1           | 0.596                  | 11.8           | 1.000                | 151.3                  | 225.5               | 0.866   | 198.8                | 0.995   | 290.1                | 1.000   |                      |         |
| <b>Outpatient Services total</b>      | 108.4               | 90.3           | 0.000                 | 107.4          | 1.000                  | 103.1          | 0.764                | 1,421.0                | 1,345.1             | 1.000   | 1,359.0              | 1.000   | 1,372.1              | 0.771   |                      |         |
| Thereof outpatient                    |                     |                |                       |                |                        |                |                      |                        |                     |         |                      |         |                      |         |                      |         |
| Surgery knee/hip                      | 4.3                 | 1.2            | 0.000                 | 1.7            | 0.000                  | 1.6            | 0.000                | 74.9                   | 16.9                | 0.000   | 10.0                 | 0.000   | 6.0                  | 0.000   |                      |         |
| Surgery other                         | 1.9                 | 1.8            | 1.000                 | 1.8            | 1.000                  | 1.8            | 1.000                | 23.4                   | 15.5                | 0.998   | 24.4                 | 1.000   | 32.1                 | 1.000   |                      |         |
| <b>Primary health sector total</b>    | 48.9                | 75.5           | 0.000                 | 49.6           | 0.963                  | 56.1           | 0.000                | 562.7                  | 669.7               | 0.000   | 593.8                | 0.614   | 581.8                | 0.000   |                      |         |
| Thereof primary                       |                     |                |                       |                |                        |                |                      |                        |                     |         |                      |         |                      |         |                      |         |
| Physiotherapy                         | 5.2                 | 33.7           | 0.000                 | 7.7            | 0.000                  | 14.2           | 0.000                | 66.2                   | 175.4               | 0.000   | 68.5                 | 1.000   | 60.8                 | 0.000   |                      |         |
| Chiropractic                          | 0.5                 | 0.5            | 1.000                 | 0.5            | 0.768                  | 0.5            | 0.946                | 6.2                    | 6.9                 | 0.999   | 6.0                  | 1.000   | 5.7                  | 0.942   |                      |         |
| General practitioner                  | 18.5                | 16.7           | 0.000                 | 17.5           | 0.000                  | 17.3           | 0.000                | 215.8                  | 206.4               | 0.783   | 222.9                | 0.977   | 221.1                | 0.000   |                      |         |
| Other primary                         | 24.7                | 24.5           | 1.000                 | 23.9           | 0.560                  | 24.0           | 0.816                | 274.6                  | 281.0               | 1.000   | 296.3                | 0.809   | 294.2                | 0.818   |                      |         |
| <b>Prescription medications total</b> | 28.8                | 29.5           | 0.998                 | 29.9           | 0.873                  | 29.8           | 0.943                | 314.5                  | 346.9               | 0.782   | 367.7                | 0.161   | 372.8                | 0.938   |                      |         |
| Thereof prescription                  |                     |                |                       |                |                        |                |                      |                        |                     |         |                      |         |                      |         |                      |         |
| Painkiller medications                | 3.4                 | 3.6            | 1.000                 | 3.8            | 0.985                  | 3.7            | 0.995                | 34.8                   | 38.4                | 0.940   | 40.2                 | 0.616   | 39.3                 | 0.996   |                      |         |
| Not painkiller medications            | 25.4                | 25.9           | 1.000                 | 26.2           | 0.982                  | 26.1           | 0.993                | 279.8                  | 308.5               | 0.869   | 327.5                | 0.252   | 333.5                | 0.994   |                      |         |
| <b>Health costs total (somatic)</b>   | 259.2               | 263.0          | 1.000                 | 357.6          | 0.000                  | 333.8          | 0.000                | 3,260.3                | 4,147.0             | 0.001   | 4,406.6              | 0.000   | 4,056.4              | 0.000   |                      |         |
| <b>Home care</b>                      |                     |                |                       |                |                        |                |                      |                        |                     |         |                      |         |                      |         |                      |         |
| <b>Home care total</b>                | 2.5                 | 3.2            | 0.851                 | 4.6            | 0.001                  | 4.2            | 0.002                | 30.7                   | 60.1                | 0.718   | 107.7                | 0.016   | 203.3                | 0.015   |                      |         |
| Thereof home care                     |                     |                |                       |                |                        |                |                      |                        |                     |         |                      |         |                      |         |                      |         |
| Home care – Care                      | 1.0                 | 1.6            | 0.965                 | 2.5            | 0.008                  | 2.2            | 0.013                | 8.3                    | 29.8                | 0.756   | 69.4                 | 0.019   | 151.7                | 0.147   |                      |         |
| Home care - Practical help            | 1.5                 | 1.7            | 0.974                 | 2.1            | 0.078                  | 2.0            | 0.141                | 22.4                   | 30.3                | 0.982   | 38.4                 | 0.390   | 51.7                 | 0.003   |                      |         |
| <b>Hip (n: 4,093)</b>                 |                     |                |                       |                |                        |                |                      | <b>Hip (n: 658)</b>    |                     |         |                      |         |                      |         |                      |         |
| <b>Health costs (somatic)</b>         |                     |                |                       |                |                        |                |                      |                        |                     |         |                      |         |                      |         |                      |         |
| <b>Inpatient Admissions total</b>     | 79.8                | 127.1          | 0.000                 | 274.4          | 0.000                  | 237.4          | 0.000                | 1,099.4                | 3,047.2             | 0.000   | 2,699.7              | 0.000   | 2,141.7              | 0.000   |                      |         |
| Thereof inpatient                     |                     |                |                       |                |                        |                |                      |                        |                     |         |                      |         |                      |         |                      |         |
| Surgery knee/hip                      | 13.0                | 77.2           | 0.000                 | 181.5          | 0.000                  | 155.3          | 0.000                | 162.5                  | 1,901.2             | 0.000   | 1,391.5              | 0.000   | 901.2                | 0.000   |                      |         |
| Surgery other                         | 6.8                 | 2.7            | 0.198                 | 10.4           | 0.732                  | 8.4            | 0.998                | 95.8                   | 122.7               | 1.000   | 131.9                | 1.000   | 137.1                | 0.999   |                      |         |
| <b>Outpatient Services total</b>      | 96.4                | 87.0           | 0.676                 | 114.8          | 0.040                  | 107.8          | 0.453                | 1,169.9                | 1,259.9             | 1.000   | 1,420.9              | 0.947   | 1,478.7              | 0.463   |                      |         |
| Thereof outpatient                    |                     |                |                       |                |                        |                |                      |                        |                     |         |                      |         |                      |         |                      |         |
| Surgery knee/hip                      | 0.3                 | 0.7            | 0.999                 | 0.9            | 0.750                  | 0.8            | 0.661                | 6.8                    | 9.9                 | 1.000   | 0.0                  | 0.996   | 0.0                  | 0.673   |                      |         |
| Surgery other                         | 1.7                 | 3.0            | 0.855                 | 2.2            | 0.996                  | 2.4            | 0.874                | 28.2                   | 18.3                | 1.000   | 17.1                 | 0.999   | 15.0                 | 1.000   |                      |         |
| <b>Primary health sector total</b>    | 49.1                | 79.9           | 0.000                 | 51.9           | 0.000                  | 58.9           | 0.000                | 571.3                  | 701.2               | 0.000   | 611.1                | 0.934   | 594.4                | 0.000   |                      |         |
| Thereof primary                       |                     |                |                       |                |                        |                |                      |                        |                     |         |                      |         |                      |         |                      |         |
| Physiotherapy                         | 6.4                 | 37.5           | 0.000                 | 8.8            | 0.000                  | 16.0           | 0.000                | 89.6                   | 208.1               | 0.000   | 91.3                 | 1.000   | 72.0                 | 0.000   |                      |         |
| Chiropractic                          | 0.7                 | 0.5            | 0.031                 | 0.5            | 0.001                  | 0.5            | 0.001                | 8.1                    | 7.2                 | 1.000   | 4.6                  | 0.034   | 6.4                  | 0.002   |                      |         |
| General practitioner                  | 18.0                | 16.9           | 0.041                 | 17.9           | 1.000                  | 17.7           | 0.970                | 206.9                  | 205.7               | 1.000   | 233.1                | 0.759   | 218.7                | 0.972   |                      |         |
| Other primary                         | 23.9                | 24.9           | 0.983                 | 24.7           | 0.993                  | 24.7           | 0.986                | 266.6                  | 280.3               | 1.000   | 292.1                | 0.973   | 297.3                | 0.988   |                      |         |
| <b>Prescription medications total</b> | 28.7                | 29.6           | 1.000                 | 30.3           | 1.000                  | 30.1           | 0.977                | 316.9                  | 358.8               | 0.989   | 335.2                | 1.000   | 349.8                | 0.980   |                      |         |
| Thereof prescription                  |                     |                |                       |                |                        |                |                      |                        |                     |         |                      |         |                      |         |                      |         |
| Painkiller medications                | 3.1                 | 4.1            | 0.000                 | 3.9            | 0.000                  | 4.0            | 0.000                | 33.4                   | 44.6                | 0.530   | 37.1                 | 1.000   | 35.8                 | 0.000   |                      |         |
| Not painkiller medications            | 25.7                | 25.6           | 1.000                 | 26.3           | 1.000                  | 26.1           | 1.000                | 283.5                  | 314.2               | 1.000   | 298.1                | 1.000   | 314.0                | 1.000   |                      |         |
| <b>Health costs total (somatic)</b>   | 254.1               | 323.6          | 0.000                 | 471.5          | 0.000                  | 434.2          | 0.000                | 3,157.5                | 5,367.0             | 0.000   | 5,066.9              | 0.000   | 4,564.6              | 0.000   |                      |         |
| <b>Home care</b>                      |                     |                |                       |                |                        |                |                      |                        |                     |         |                      |         |                      |         |                      |         |
| <b>Home care total</b>                | 3.4                 | 4.0            | 1.000                 | 4.9            | 0.977                  | 4.7            | 0.994                | 78.3                   | 108.9               | 1.000   | 189.1                | 1.000   | 265.0                | 0.994   |                      |         |
| Thereof home care                     |                     |                |                       |                |                        |                |                      |                        |                     |         |                      |         |                      |         |                      |         |
| Home care – Care                      | 1.8                 | 2.1            | 1.000                 | 2.7            | 0.999                  | 2.6            | 1.000                | 53.1                   | 79.5                | 1.000   | 152.3                | 0.995   | 218.6                | 1.000   |                      |         |
| Home care - Practical help            | 1.6                 | 1.9            | 1.000                 | 2.2            | 0.710                  | 2.1            | 0.869                | 25.2                   | 29.3                | 1.000   | 36.8                 | 0.999   | 46.4                 | 0.994   |                      |         |

38 Table S4. Adjusted health care costs and home care costs one year prior to and one or three years following GLA:D® for knee and hip patients

|                                       | One-year horizon        |                |                       |                |                        |                |                     | Three-year horizon      |                     |              |                      |         |                      |         |                      |         |
|---------------------------------------|-------------------------|----------------|-----------------------|----------------|------------------------|----------------|---------------------|-------------------------|---------------------|--------------|----------------------|---------|----------------------|---------|----------------------|---------|
|                                       | Pre-period (1 year)     |                | Post-period (mth 1-3) |                | Post-period (mth 4-12) |                | Post-period (year1) |                         | Pre-period (1 year) |              | Post-period (year 1) |         | Post-period (year 2) |         | Post-period (year 3) |         |
|                                       | Cost (€/month)          | Cost (€/month) | p-value               | Cost (€/month) | p-value                | Cost (€/month) | p-value             | Cost (€/Year)           | Cost (€/year)       | p-value      | Cost (€/year)        | p-value | Cost (€/year)        | p-value | Cost (€/year)        | p-value |
|                                       | <b>Knee<sup>‡</sup></b> |                |                       |                |                        |                |                     | <b>Knee<sup>§</sup></b> |                     |              |                      |         |                      |         |                      |         |
| <b>Health costs (somatic)</b>         |                         |                |                       |                |                        |                |                     |                         |                     |              |                      |         |                      |         |                      |         |
| <b>Inpatient Admissions total</b>     | <b>70.2</b>             | <b>61.6</b>    | 0.097                 | <b>159.9</b>   | 0.000                  | <b>135.2</b>   | 0.000               | <b>935.1</b>            | <b>1,657.4</b>      | 0.000        | <b>2,105.4</b>       | 0.000   | <b>1,671.9</b>       | 0.000   |                      |         |
| Thereof inpatient                     |                         |                |                       |                |                        |                |                     |                         |                     |              |                      |         |                      |         |                      |         |
| Surgery knee/hip                      | 9.1                     | 17.5           | 0.000                 | 68.2           | 0.000                  | 55.5           | 0.000               | 176.2                   | 610.9               | 0.000        | 739.9                | 0.000   | 456.0                | 0.000   |                      |         |
| Surgery other                         | 8.9                     | 3.9            | 0.002                 | 10.1           | 0.340                  | 8.5            | 0.767               | 112.1                   | 152.2               | 0.318        | 153.9                | 0.294   | 211.4                | 0.052   |                      |         |
| <b>Outpatient Services total</b>      | <b>105.7</b>            | <b>86.7</b>    | 0.000                 | <b>103.0</b>   | 0.328                  | <b>98.9</b>    | 0.006               | <b>1,415.7</b>          | <b>1,307.8</b>      | 0.273        | <b>1,337.8</b>       | 0.486   | <b>1,352.6</b>       | 0.515   |                      |         |
| Thereof outpatient                    |                         |                |                       |                |                        |                |                     |                         |                     |              |                      |         |                      |         |                      |         |
| Surgery knee/hip                      | 0.7                     | 0.2            | 0.000                 | 0.3            | 0.000                  | 0.3            | 0.000               | 80.6                    | 17.8                | -            | 7.4                  | -       | 6.7                  | -       |                      |         |
| Surgery other                         | 1.7                     | 1.5            | 0.692                 | 1.4            | 0.370                  | 1.5            | 0.376               | 25.4                    | 18.8                | 0.453        | 28.8                 | 0.736   | 38.0                 | 0.291   |                      |         |
| <b>Primary health sector total</b>    | <b>59.4</b>             | <b>92.4</b>    | 0.000                 | <b>60.3</b>    | 0.041                  | <b>68.3</b>    | 0.000               | <b>608.8</b>            | <b>720.2</b>        | 0.000        | <b>632.4</b>         | 0.031   | <b>621.8</b>         | 0.275   |                      |         |
| Thereof primary                       |                         |                |                       |                |                        |                |                     |                         |                     |              |                      |         |                      |         |                      |         |
| Physiotherapy                         | 6.5                     | 42.5           | 0.000                 | 9.5            | 0.000                  | 17.7           | 0.000               | 70.0                    | 190.5               | 0.000        | 71.8                 | 0.584   | 64.3                 | 0.103   |                      |         |
| Chiropractic                          | 0.5                     | 0.5            | 0.144                 | 0.5            | 0.004                  | 0.5            | 0.003               | 5.7                     | 6.3                 | 0.221        | 5.6                  | 0.870   | 5.1                  | 0.264   |                      |         |
| General practitioner                  | 18.3                    | 16.5           | 0.000                 | 17.3           | 0.000                  | 17.1           | 0.000               | 235.4                   | 223.5               | 0.002        | 240.2                | 0.256   | 238.6                | 0.468   |                      |         |
| Other primary                         | 33.7                    | 33.8           | 0.874                 | 32.8           | 0.029                  | 33.1           | 0.082               | 297.9                   | 298.9               | 0.904        | 314.6                | 0.066   | 313.6                | 0.118   |                      |         |
| <b>Prescription medications total</b> | <b>29.5</b>             | <b>30.4</b>    | 0.008                 | <b>30.6</b>    | 0.000                  | <b>30.6</b>    | 0.000               | <b>363.0</b>            | <b>396.8</b>        | 0.000        | <b>415.2</b>         | 0.000   | <b>419.3</b>         | 0.000   |                      |         |
| Thereof prescription                  |                         |                |                       |                |                        |                |                     |                         |                     |              |                      |         |                      |         |                      |         |
| Painkiller medications                | 3.5                     | 3.8            | 0.000                 | 3.9            | 0.000                  | 3.9            | 0.000               | 43.2                    | 47.9                | 0.001        | 49.8                 | 0.001   | 49.2                 | 0.004   |                      |         |
| Not painkiller medications            | 25.8                    | 26.3           | 0.061                 | 26.5           | 0.003                  | 26.4           | 0.003               | 318.8                   | 348.1               | 0.000        | 364.3                | 0.000   | 368.6                | 0.000   |                      |         |
| <b>Health costs total (somatic)</b>   | <b>263.3</b>            | <b>263.7</b>   | 0.952                 | <b>354.0</b>   | 0.000                  | <b>331.3</b>   | 0.000               | <b>3,391.7</b>          | <b>4,146.2</b>      | 0.000        | <b>4,518.3</b>       | 0.000   | <b>4,127.5</b>       | 0.000   |                      |         |
| <b>Home care</b>                      |                         |                |                       |                |                        |                |                     |                         |                     |              |                      |         |                      |         |                      |         |
| <b>Home care total</b>                | <b>2.7</b>              | <b>3.6</b>     | 0.029                 | <b>5.0</b>     | 0.001                  | <b>4.6</b>     | 0.001               | <b>35.5</b>             | <b>77.2</b>         | <b>0.011</b> | <b>131.1</b>         | 0.000   | <b>214.6</b>         | 0.000   |                      |         |
| Thereof home care                     |                         |                |                       |                |                        |                |                     |                         |                     |              |                      |         |                      |         |                      |         |
| Home care – Care                      | 0.9                     | 1.4            | 0.004                 | 2.1            | 0.082                  | 2.0            | 0.153               | 8.5                     | 41.1                | 0.014        | 90.2                 | 0.000   | 149.0                | 0.000   |                      |         |
| Home care – Practical help            | 1.8                     | 2.2            | 0.029                 | 2.8            | 0.000                  | 2.6            | 0.000               | 28.1                    | 44.5                | 0.052        | 53.0                 | 0.001   | 68.1                 | 0.000   |                      |         |
|                                       | <b>Hip<sup>#</sup></b>  |                |                       |                |                        |                |                     | <b>Hip<sup>§</sup></b>  |                     |              |                      |         |                      |         |                      |         |
| <b>Health costs (somatic)</b>         |                         |                |                       |                |                        |                |                     |                         |                     |              |                      |         |                      |         |                      |         |
| <b>Inpatient Admissions total</b>     | <b>71.7</b>             | <b>111.3</b>   | 0.000                 | <b>243.2</b>   | 0.000                  | <b>208.9</b>   | 0.000               | <b>978.4</b>            | <b>2,818.4</b>      | 0.000        | <b>2,461.1</b>       | 0.000   | <b>1,966.0</b>       | 0.006   |                      |         |
| Thereof inpatient                     |                         |                |                       |                |                        |                |                     |                         |                     |              |                      |         |                      |         |                      |         |
| Surgery knee/hip                      | 11.6                    | 67.0           | 0.000                 | 167.5          | 0.000                  | 142.3          | 0.000               | 138.1                   | 1,734.6             | 0.000        | 1,294.2              | 0.000   | 788.5                | 0.000   |                      |         |
| Surgery other                         | 6.9                     | 1.3            | 0.001                 | 11.8           | 0.086                  | 9.2            | 0.353               | 89.2                    | 145.3               | 0.342        | 129.6                | 0.465   | 139.2                | 0.370   |                      |         |
| <b>Outpatient Services total</b>      | <b>77.1</b>             | <b>68.9</b>    | 0.006                 | <b>91.2</b>    | 0.000                  | <b>85.4</b>    | 0.012               | <b>1,174.6</b>          | <b>1,270.1</b>      | 0.401        | <b>1,441.3</b>       | 0.074   | <b>1,513.5</b>       | 0.038   |                      |         |
| Thereof outpatient                    |                         |                |                       |                |                        |                |                     |                         |                     |              |                      |         |                      |         |                      |         |
| Surgery knee/hip*                     | 0.0                     | 0.0            | 0.238                 | 0.2            | 0.000                  | 0.1            | 0.000               | -                       | -                   |              | -                    |         | -                    |         |                      |         |
| Surgery other                         | 0.4                     | 0.3            | 0.799                 | 0.4            | 0.927                  | 0.4            | 0.881               | 37.7                    | 29.6                | 0.643        | 24.5                 | 0.383   | 22.1                 | 0.395   |                      |         |
| <b>Primary health sector total</b>    | <b>58.7</b>             | <b>96.3</b>    | 0.000                 | <b>62.4</b>    | 0.000                  | <b>70.9</b>    | 0.000               | <b>584.9</b>            | <b>719.9</b>        | 0.000        | <b>625.2</b>         | 0.021   | <b>608.4</b>         | 0.231   |                      |         |
| Thereof primary                       |                         |                |                       |                |                        |                |                     |                         |                     |              |                      |         |                      |         |                      |         |
| Physiotherapy                         | 8.1                     | 47.7           | 0.000                 | 11.0           | 0.000                  | 20.2           | 0.000               | 94.5                    | 221.7               | 0.000        | 96.4                 | 0.805   | 74.8                 | 0.003   |                      |         |
| Chiropractic                          | 0.5                     | 0.4            | 0.000                 | 0.4            | 0.000                  | 0.4            | 0.000               | 8.9                     | 7.3                 | 0.143        | 4.9                  | 0.000   | 6.6                  | 0.144   |                      |         |
| General practitioner                  | 17.3                    | 16.3           | 0.000                 | 17.2           | 0.346                  | 16.9           | 0.019               | 214.1                   | 212.0               | 0.728        | 228.4                | 0.020   | 224.9                | 0.120   |                      |         |
| Other primary                         | 32.4                    | 33.9           | 0.120                 | 34.0           | 0.038                  | 33.9           | 0.029               | 269.0                   | 283.3               | 0.386        | 294.0                | 0.098   | 300.4                | 0.056   |                      |         |
| <b>Prescription medications total</b> | <b>28.3</b>             | <b>28.9</b>    | 0.333                 | <b>29.6</b>    | 0.005                  | <b>29.4</b>    | 0.023               | <b>337.5</b>            | <b>381.9</b>        | 0.016        | <b>350.5</b>         | 0.642   | <b>368.7</b>         | 0.298   |                      |         |
| Thereof prescription                  |                         |                |                       |                |                        |                |                     |                         |                     |              |                      |         |                      |         |                      |         |
| Painkiller medications                | 2.9                     | 3.8            | 0.000                 | 3.7            | 0.000                  | 3.7            | 0.000               | 38.0                    | 49.2                | 0.000        | 41.8                 | 0.189   | 41.5                 | 0.327   |                      |         |
| Not painkiller medications            | 25.2                    | 24.8           | 0.452                 | 25.7           | 0.330                  | 25.4           | 0.747               | 298.0                   | 332.1               | 0.058        | 306.2                | 0.766   | 324.5                | 0.365   |                      |         |
| <b>Health costs total (somatic)</b>   | <b>234.5</b>            | <b>297.6</b>   | 0.000                 | <b>433.0</b>   | 0.000                  | <b>397.3</b>   | 0.000               | <b>3,051.0</b>          | <b>5,207.7</b>      | 0.000        | <b>4,902.1</b>       | 0.000   | <b>4,473.4</b>       | 0.001   |                      |         |
| <b>Home care</b>                      |                         |                |                       |                |                        |                |                     |                         |                     |              |                      |         |                      |         |                      |         |
| <b>Home care total</b>                | <b>1.1</b>              | <b>1.7</b>     | 0.255                 | <b>1.9</b>     | 0.009                  | <b>1.9</b>     | 0.009               | <b>82.4</b>             | <b>111.4</b>        | 0.012        | <b>214.5</b>         | 0.000   | <b>406.0</b>         | 0.041   |                      |         |
| Thereof home care                     |                         |                |                       |                |                        |                |                     |                         |                     |              |                      |         |                      |         |                      |         |
| Home care – Care                      | 0.3                     | 0.3            | 0.881                 | 0.4            | 0.195                  | 0.4            | 0.264               | 55.1                    | 79.1                | 0.099        | 173.3                | 0.062   | 356.3                | 0.064   |                      |         |

|                            |                                                                                                                                                                                                                |     |       |     |       |     |       |      |      |       |      |       |      |       |
|----------------------------|----------------------------------------------------------------------------------------------------------------------------------------------------------------------------------------------------------------|-----|-------|-----|-------|-----|-------|------|------|-------|------|-------|------|-------|
| Home care - Practical help | 1.1                                                                                                                                                                                                            | 1.4 | 0.067 | 1.7 | 0.010 | 1.7 | 0.008 | 28.7 | 33.1 | 0.001 | 46.1 | 0.000 | 61.0 | 0.012 |
| 39                         | *Adjusted health care costs and costs for home care in one-year horizon for women, 65 years, married/co-living, Danish ethnicity, low education and living in the Capital Region estimated using a generalized |     |       |     |       |     |       |      |      |       |      |       |      |       |
| 40                         | estimating equation gamma regression model for repeated measures including sex, age, marital status, ethnicity, education and region as covariates. Because of no convergence in the model marital status and  |     |       |     |       |     |       |      |      |       |      |       |      |       |
| 41                         | ethnicity were omitted estimating costs for home care.                                                                                                                                                         |     |       |     |       |     |       |      |      |       |      |       |      |       |
| 42                         | ‡Adjusted health care costs and costs for home care in three-year horizon for women, 65 years, married/co-living and low education estimated using a generalized estimating equation gamma regression model    |     |       |     |       |     |       |      |      |       |      |       |      |       |
| 43                         | for repeated measures including sex, age and education. Because of no convergence in the model age and education were omitted estimating costs for home care.                                                  |     |       |     |       |     |       |      |      |       |      |       |      |       |
| 44                         | *Surgery is not predicted in a three-year horizon because of no convergence of the model.                                                                                                                      |     |       |     |       |     |       |      |      |       |      |       |      |       |

45



46 **Table S5. Sensitivity analysis - adjusted estimated health care cost per QALY from baseline to 12**  
 47 **months for knee and hip patients attending GLA:D® in private clinics, municipal clinics and patients**  
 48 **with complete information**

49

|                                     | Knee                                      |                                  |                          | Hip                                       |                                  |                           |
|-------------------------------------|-------------------------------------------|----------------------------------|--------------------------|-------------------------------------------|----------------------------------|---------------------------|
|                                     | Change in health care costs (€) (95 % CI) | Change in EQ-5D (QALY) (95 % CI) | Euro pr. QALY (95 % CI)  | Change in health care costs (€) (95 % CI) | Change in EQ-5D (QALY) (95 % CI) | Euro pr. QALY (95 % CI)   |
| <b>Private clinic<sup>§</sup></b>   | 267<br>(181-385)                          | 0.036<br>(0.033-0.038)           | 7,464<br>(5,485-10,132)  | 651<br>(398-1,050)                        | 0.028<br>(0.024-0.033)           | 22,914<br>(16,583-31,818) |
| <b>Municipal clinic<sup>#</sup></b> | 396<br>(118-949)                          | 0.032<br>(0.026-0.039)           | 12,292<br>(4,538-24,333) | 443<br>(69-2,056)                         | 0.028<br>(0.017-0.043)           | 15,550<br>(4,059-47,814)  |
| <b>Complete cases<sup>¶</sup></b>   | 167<br>(74-310)                           | 0.035<br>(0.032-0.037)           | 4,829<br>(2,313-8,378)   | 579<br>(284-1,142)                        | 0.027<br>(0.023-0.032)           | 21,067<br>(12,348-35,388) |

50

All analyses are adjusted for age, gender, marital status, ethnicity, educational level and region

51

<sup>§</sup>Analysis restricted to patients attending GLA:D® in a private clinic

52

<sup>#</sup>Analysis restricted to patients attending GLA:D® in a private clinic

53

<sup>¶</sup>Analysis restricted to patients with complete information on EQ-5D
